# Supplementary material for: Cyclopentadienylcobalt azaboranes violating the Wade–Mingos rules: a degree 3 vertex for the nitrogen atom
Source: Royal Society of Chemistry journal article supplement (doi:10.1039/c5ra09849a), 2015-01-01
Supplement: c5ra09849a1.pdf [file c5ra09849a1.pdf]

## Supporting Information

# Cyclopentadienylcobalt Azaboranes Violating the Wade-Mingos Rules: A Degree 3 Vertex For the Nitrogen Atom

Amr A. A. Attia,<sup>1</sup> Alexandru Lupan,\*<sup>1</sup> and R. Bruce King\*<sup>2</sup>

<sup>1</sup>*Department of Chemistry, Faculty of Chemistry and Chemical Engineering, Babeş-Bolyai University, Cluj-Napoca, Romania*

<sup>2</sup>*Department of Chemistry and Center for Computational Quantum Chemistry, University of Georgia, Athens, Georgia, 30602, USA*

Table S1A. Initial CpCoNHB<sub>6</sub>H<sub>6</sub> structures.

Table S1B. Distance table for the lowest-lying CpCoNHB<sub>6</sub>H<sub>6</sub> structures.

Table S1C. Energy ranking for all the CpCoNHB<sub>6</sub>H<sub>6</sub> structures.

Table S2A. Initial CpCoNHB<sub>7</sub>H<sub>7</sub> structures.

Table S2B. Distance table for the lowest-lying CpCoNHB<sub>7</sub>H<sub>7</sub> structures.

Table S2C. Energy ranking for all the CpCoNHB<sub>7</sub>H<sub>7</sub> structures.

Table S3A. Initial CpCoNHB<sub>8</sub>H<sub>8</sub> structures.

Table S3B. Distances table for the lowest-lying CpCoNHB<sub>8</sub>H<sub>8</sub> structures.

Table S3C. Energy ranking for all the CpCoNHB<sub>8</sub>H<sub>8</sub> structures.

Table S4A. Initial CpCoNHB<sub>9</sub>H<sub>9</sub> structures.

Table S4B. Distance table for the lowest-lying CpCoNHB<sub>9</sub>H<sub>9</sub> structures.

Table S4C. Energy ranking for all the CpCoNHB<sub>9</sub>H<sub>9</sub> structures.

Table S5A. Initial CpCoNHB<sub>10</sub>H<sub>10</sub> structures.

Table S5B. Distance table for the lowest-lying CpCoNHB<sub>10</sub>H<sub>10</sub> structures.

Table S5C. Energy ranking for all the CpCoNHB<sub>10</sub>H<sub>10</sub> structures.

Complete Gaussian09 Reference (reference 15)

Gaussian 09, Revision A.02,

M. J. Frisch, G. W. Trucks, H. B. Schlegel, G. E. Scuseria, M. A. Robb, J. R. Cheeseman, G. Scalmani, V. Barone, B. Mennucci, G. A. Petersson, H. Nakatsuji, M. Caricato, X. Li, H. P. Hratchian, A. F. Izmaylov, J. Bloino, G. Zheng, J. L. Sonnenberg, M. Hada, M. Ehara, K. Toyota, R. Fukuda, J. Hasegawa, M. Ishida, T. Nakajima, Y. Honda, O. Kitao, H. Nakai, T. Vreven, J. A. Montgomery, Jr., J. E. Peralta, F. Ogliaro, M. Bearpark, J. J. Heyd, E. Brothers, K. N. Kudin, V. N. Staroverov, R. Kobayashi, J. Normand, K. Raghavachari, A. Rendell, J. C. Burant, S. S. Iyengar, J. Tomasi, M. Cossi, N. Rega, J. M. Millam, M. Klene, J. E. Knox, J. B. Cross, V. Bakken, C. Adamo, J. Jaramillo, R. Gomperts, R. E. Stratmann, O. Yazyev, A. J. Austin, R. Cammi, C. Pomelli, J. W. Ochterski, R. L. Martin, K. Morokuma, V. G. Zakrzewski, G. A. Voth, P. Salvador, J. J. Dannenberg, S. Dapprich, A. D. Daniels, O. Farkas, J. B. Foresman, J. V. Ortiz, J. Cioslowski, and D. J. Fox, Gaussian, Inc., Wallingford CT, 2009.

Table S1A. Initial CpCoNHB<sub>6</sub>H<sub>6</sub> structures, 101 in all.

|                                                                                                                   |                                                                                                                                      |                                                                                                                                       |
|-------------------------------------------------------------------------------------------------------------------|--------------------------------------------------------------------------------------------------------------------------------------|---------------------------------------------------------------------------------------------------------------------------------------|
| <p>Initial structures</p>                                                                                         | 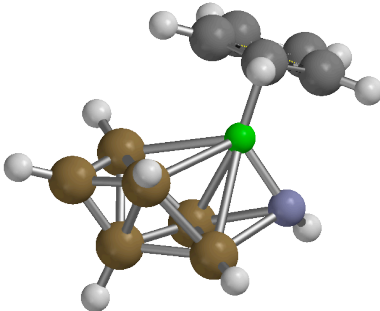 <p>Trigonal Antiprism 6</p>                        |  <p>Antiprism 4</p>                                |
|  <p>Hexagonal bipyramid 8</p>    |  <p>Bisdisphenoid 13</p>                            |  <p>Cube 3</p>                                     |
|  <p>Bicapped octahedron 13</p> |  <p>Bicapped trigonal prism C<sub>2v</sub> 18</p> |  <p>Bicapped trigonal prism C<sub>s</sub> 24</p> |
|  <p>Nido 4</p>                 |  <p>Trigonal prism 5</p>                          |  <p>Tetracapped tetrahedron 3</p>                |

Table S1B. Distance table for the lowest-lying CpCoNHB<sub>6</sub>H<sub>6</sub> structures after M06L/6-311G(d,p) optimization. Included are the ZPcorrected E (a.u.), relative energy (kcal/mol), HOMO/LUMO gaps (eV) and symmetry.

| 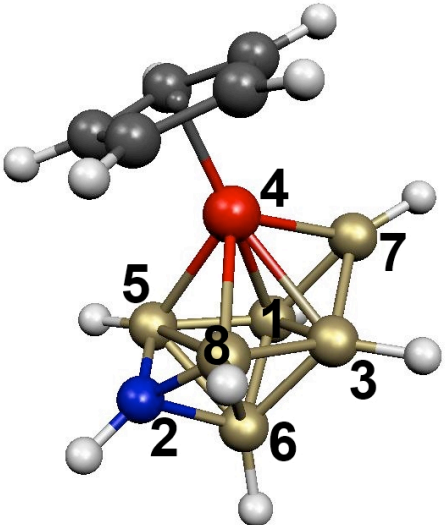 <p>1. -1784.305162 0.0 H/L 2.90 C<sub>s</sub></p>    | <table border="1"> <thead> <tr> <th></th> <th>1</th> <th>2</th> <th>3</th> <th>4</th> <th>5</th> </tr> </thead> <tbody> <tr><td>1 B</td><td>0.000000</td><td></td><td></td><td></td><td></td></tr> <tr><td>2 N</td><td>2.596985</td><td>0.000000</td><td></td><td></td><td></td></tr> <tr><td>3 B</td><td>1.732800</td><td>2.596985</td><td>0.000000</td><td></td><td></td></tr> <tr><td>4 Co</td><td>2.108922</td><td>2.678440</td><td>2.108922</td><td>0.000000</td><td></td></tr> <tr><td>5 B</td><td>1.717723</td><td>1.500716</td><td>2.635670</td><td>2.101490</td><td>0.000000</td></tr> <tr><td>6 B</td><td>1.750527</td><td>1.567663</td><td>1.750527</td><td>2.875961</td><td>1.886243</td></tr> <tr><td>7 B</td><td>1.697894</td><td>3.690543</td><td>1.697894</td><td>1.876187</td><td>3.009220</td></tr> <tr><td>8 B</td><td>2.635670</td><td>1.500716</td><td>1.717723</td><td>2.101490</td><td>2.306200</td></tr> <tr> <td></td> <td>6</td> <td>7</td> <td>8</td> <td></td> <td></td> </tr> <tr><td>6 B</td><td>0.000000</td><td></td><td></td><td></td><td></td></tr> <tr><td>7 B</td><td>2.981017</td><td>0.000000</td><td></td><td></td><td></td></tr> <tr><td>8 B</td><td>1.886243</td><td>3.009220</td><td>0.000000</td><td></td><td></td></tr> </tbody> </table> |          | 1        | 2        | 3        | 4 | 5 | 1 B | 0.000000 |  |  |  |  | 2 N  | 2.596985 | 0.000000 |  |  |  | 3 B | 1.732800 | 2.596985 | 0.000000 |  |  | 4 Co | 2.108922 | 2.678440 | 2.108922 | 0.000000 |  | 5 B | 1.717723 | 1.500716 | 2.635670 | 2.101490 | 0.000000 | 6 B | 1.750527 | 1.567663 | 1.750527 | 2.875961 | 1.886243 | 7 B | 1.697894 | 3.690543 | 1.697894 | 1.876187 | 3.009220 | 8 B | 2.635670 | 1.500716 | 1.717723 | 2.101490 | 2.306200 |  | 6 | 7 | 8 |  |  | 6 B | 0.000000 |  |  |  |  | 7 B | 2.981017 | 0.000000 |  |  |  | 8 B | 1.886243 | 3.009220 | 0.000000 |  |  |
|----------------------------------------------------------------------------------------------------------------------------------------|---------------------------------------------------------------------------------------------------------------------------------------------------------------------------------------------------------------------------------------------------------------------------------------------------------------------------------------------------------------------------------------------------------------------------------------------------------------------------------------------------------------------------------------------------------------------------------------------------------------------------------------------------------------------------------------------------------------------------------------------------------------------------------------------------------------------------------------------------------------------------------------------------------------------------------------------------------------------------------------------------------------------------------------------------------------------------------------------------------------------------------------------------------------------------------------------------------------------------------------------------------------------------------------|----------|----------|----------|----------|---|---|-----|----------|--|--|--|--|------|----------|----------|--|--|--|-----|----------|----------|----------|--|--|------|----------|----------|----------|----------|--|-----|----------|----------|----------|----------|----------|-----|----------|----------|----------|----------|----------|-----|----------|----------|----------|----------|----------|-----|----------|----------|----------|----------|----------|--|---|---|---|--|--|-----|----------|--|--|--|--|-----|----------|----------|--|--|--|-----|----------|----------|----------|--|--|
|                                                                                                                                        | 1                                                                                                                                                                                                                                                                                                                                                                                                                                                                                                                                                                                                                                                                                                                                                                                                                                                                                                                                                                                                                                                                                                                                                                                                                                                                                     | 2        | 3        | 4        | 5        |   |   |     |          |  |  |  |  |      |          |          |  |  |  |     |          |          |          |  |  |      |          |          |          |          |  |     |          |          |          |          |          |     |          |          |          |          |          |     |          |          |          |          |          |     |          |          |          |          |          |  |   |   |   |  |  |     |          |  |  |  |  |     |          |          |  |  |  |     |          |          |          |  |  |
| 1 B                                                                                                                                    | 0.000000                                                                                                                                                                                                                                                                                                                                                                                                                                                                                                                                                                                                                                                                                                                                                                                                                                                                                                                                                                                                                                                                                                                                                                                                                                                                              |          |          |          |          |   |   |     |          |  |  |  |  |      |          |          |  |  |  |     |          |          |          |  |  |      |          |          |          |          |  |     |          |          |          |          |          |     |          |          |          |          |          |     |          |          |          |          |          |     |          |          |          |          |          |  |   |   |   |  |  |     |          |  |  |  |  |     |          |          |  |  |  |     |          |          |          |  |  |
| 2 N                                                                                                                                    | 2.596985                                                                                                                                                                                                                                                                                                                                                                                                                                                                                                                                                                                                                                                                                                                                                                                                                                                                                                                                                                                                                                                                                                                                                                                                                                                                              | 0.000000 |          |          |          |   |   |     |          |  |  |  |  |      |          |          |  |  |  |     |          |          |          |  |  |      |          |          |          |          |  |     |          |          |          |          |          |     |          |          |          |          |          |     |          |          |          |          |          |     |          |          |          |          |          |  |   |   |   |  |  |     |          |  |  |  |  |     |          |          |  |  |  |     |          |          |          |  |  |
| 3 B                                                                                                                                    | 1.732800                                                                                                                                                                                                                                                                                                                                                                                                                                                                                                                                                                                                                                                                                                                                                                                                                                                                                                                                                                                                                                                                                                                                                                                                                                                                              | 2.596985 | 0.000000 |          |          |   |   |     |          |  |  |  |  |      |          |          |  |  |  |     |          |          |          |  |  |      |          |          |          |          |  |     |          |          |          |          |          |     |          |          |          |          |          |     |          |          |          |          |          |     |          |          |          |          |          |  |   |   |   |  |  |     |          |  |  |  |  |     |          |          |  |  |  |     |          |          |          |  |  |
| 4 Co                                                                                                                                   | 2.108922                                                                                                                                                                                                                                                                                                                                                                                                                                                                                                                                                                                                                                                                                                                                                                                                                                                                                                                                                                                                                                                                                                                                                                                                                                                                              | 2.678440 | 2.108922 | 0.000000 |          |   |   |     |          |  |  |  |  |      |          |          |  |  |  |     |          |          |          |  |  |      |          |          |          |          |  |     |          |          |          |          |          |     |          |          |          |          |          |     |          |          |          |          |          |     |          |          |          |          |          |  |   |   |   |  |  |     |          |  |  |  |  |     |          |          |  |  |  |     |          |          |          |  |  |
| 5 B                                                                                                                                    | 1.717723                                                                                                                                                                                                                                                                                                                                                                                                                                                                                                                                                                                                                                                                                                                                                                                                                                                                                                                                                                                                                                                                                                                                                                                                                                                                              | 1.500716 | 2.635670 | 2.101490 | 0.000000 |   |   |     |          |  |  |  |  |      |          |          |  |  |  |     |          |          |          |  |  |      |          |          |          |          |  |     |          |          |          |          |          |     |          |          |          |          |          |     |          |          |          |          |          |     |          |          |          |          |          |  |   |   |   |  |  |     |          |  |  |  |  |     |          |          |  |  |  |     |          |          |          |  |  |
| 6 B                                                                                                                                    | 1.750527                                                                                                                                                                                                                                                                                                                                                                                                                                                                                                                                                                                                                                                                                                                                                                                                                                                                                                                                                                                                                                                                                                                                                                                                                                                                              | 1.567663 | 1.750527 | 2.875961 | 1.886243 |   |   |     |          |  |  |  |  |      |          |          |  |  |  |     |          |          |          |  |  |      |          |          |          |          |  |     |          |          |          |          |          |     |          |          |          |          |          |     |          |          |          |          |          |     |          |          |          |          |          |  |   |   |   |  |  |     |          |  |  |  |  |     |          |          |  |  |  |     |          |          |          |  |  |
| 7 B                                                                                                                                    | 1.697894                                                                                                                                                                                                                                                                                                                                                                                                                                                                                                                                                                                                                                                                                                                                                                                                                                                                                                                                                                                                                                                                                                                                                                                                                                                                              | 3.690543 | 1.697894 | 1.876187 | 3.009220 |   |   |     |          |  |  |  |  |      |          |          |  |  |  |     |          |          |          |  |  |      |          |          |          |          |  |     |          |          |          |          |          |     |          |          |          |          |          |     |          |          |          |          |          |     |          |          |          |          |          |  |   |   |   |  |  |     |          |  |  |  |  |     |          |          |  |  |  |     |          |          |          |  |  |
| 8 B                                                                                                                                    | 2.635670                                                                                                                                                                                                                                                                                                                                                                                                                                                                                                                                                                                                                                                                                                                                                                                                                                                                                                                                                                                                                                                                                                                                                                                                                                                                              | 1.500716 | 1.717723 | 2.101490 | 2.306200 |   |   |     |          |  |  |  |  |      |          |          |  |  |  |     |          |          |          |  |  |      |          |          |          |          |  |     |          |          |          |          |          |     |          |          |          |          |          |     |          |          |          |          |          |     |          |          |          |          |          |  |   |   |   |  |  |     |          |  |  |  |  |     |          |          |  |  |  |     |          |          |          |  |  |
|                                                                                                                                        | 6                                                                                                                                                                                                                                                                                                                                                                                                                                                                                                                                                                                                                                                                                                                                                                                                                                                                                                                                                                                                                                                                                                                                                                                                                                                                                     | 7        | 8        |          |          |   |   |     |          |  |  |  |  |      |          |          |  |  |  |     |          |          |          |  |  |      |          |          |          |          |  |     |          |          |          |          |          |     |          |          |          |          |          |     |          |          |          |          |          |     |          |          |          |          |          |  |   |   |   |  |  |     |          |  |  |  |  |     |          |          |  |  |  |     |          |          |          |  |  |
| 6 B                                                                                                                                    | 0.000000                                                                                                                                                                                                                                                                                                                                                                                                                                                                                                                                                                                                                                                                                                                                                                                                                                                                                                                                                                                                                                                                                                                                                                                                                                                                              |          |          |          |          |   |   |     |          |  |  |  |  |      |          |          |  |  |  |     |          |          |          |  |  |      |          |          |          |          |  |     |          |          |          |          |          |     |          |          |          |          |          |     |          |          |          |          |          |     |          |          |          |          |          |  |   |   |   |  |  |     |          |  |  |  |  |     |          |          |  |  |  |     |          |          |          |  |  |
| 7 B                                                                                                                                    | 2.981017                                                                                                                                                                                                                                                                                                                                                                                                                                                                                                                                                                                                                                                                                                                                                                                                                                                                                                                                                                                                                                                                                                                                                                                                                                                                              | 0.000000 |          |          |          |   |   |     |          |  |  |  |  |      |          |          |  |  |  |     |          |          |          |  |  |      |          |          |          |          |  |     |          |          |          |          |          |     |          |          |          |          |          |     |          |          |          |          |          |     |          |          |          |          |          |  |   |   |   |  |  |     |          |  |  |  |  |     |          |          |  |  |  |     |          |          |          |  |  |
| 8 B                                                                                                                                    | 1.886243                                                                                                                                                                                                                                                                                                                                                                                                                                                                                                                                                                                                                                                                                                                                                                                                                                                                                                                                                                                                                                                                                                                                                                                                                                                                              | 3.009220 | 0.000000 |          |          |   |   |     |          |  |  |  |  |      |          |          |  |  |  |     |          |          |          |  |  |      |          |          |          |          |  |     |          |          |          |          |          |     |          |          |          |          |          |     |          |          |          |          |          |     |          |          |          |          |          |  |   |   |   |  |  |     |          |  |  |  |  |     |          |          |  |  |  |     |          |          |          |  |  |
|  <p>2. -1784.302170 +1.9 H/L 2.31 C<sub>1</sub></p>  | <table border="1"> <thead> <tr> <th></th> <th>1</th> <th>2</th> <th>3</th> <th>4</th> <th>5</th> </tr> </thead> <tbody> <tr><td>1 B</td><td>0.000000</td><td></td><td></td><td></td><td></td></tr> <tr><td>2 B</td><td>2.658361</td><td>0.000000</td><td></td><td></td><td></td></tr> <tr><td>3 N</td><td>1.682180</td><td>2.758806</td><td>0.000000</td><td></td><td></td></tr> <tr><td>4 Co</td><td>2.913798</td><td>1.977579</td><td>1.957472</td><td>0.000000</td><td></td></tr> <tr><td>5 B</td><td>1.848099</td><td>1.790527</td><td>2.448347</td><td>2.199034</td><td>0.000000</td></tr> <tr><td>6 B</td><td>1.784699</td><td>2.901728</td><td>1.498394</td><td>2.031276</td><td>1.705860</td></tr> <tr><td>7 B</td><td>1.661087</td><td>1.622477</td><td>2.664865</td><td>3.001674</td><td>1.793309</td></tr> <tr><td>8 B</td><td>1.903040</td><td>1.823375</td><td>1.569739</td><td>2.179540</td><td>2.471746</td></tr> <tr> <td></td> <td>6</td> <td>7</td> <td>8</td> <td></td> <td></td> </tr> <tr><td>6 B</td><td>0.000000</td><td></td><td></td><td></td><td></td></tr> <tr><td>7 B</td><td>2.856851</td><td>0.000000</td><td></td><td></td><td></td></tr> <tr><td>8 B</td><td>2.596437</td><td>1.749882</td><td>0.000000</td><td></td><td></td></tr> </tbody> </table> |          | 1        | 2        | 3        | 4 | 5 | 1 B | 0.000000 |  |  |  |  | 2 B  | 2.658361 | 0.000000 |  |  |  | 3 N | 1.682180 | 2.758806 | 0.000000 |  |  | 4 Co | 2.913798 | 1.977579 | 1.957472 | 0.000000 |  | 5 B | 1.848099 | 1.790527 | 2.448347 | 2.199034 | 0.000000 | 6 B | 1.784699 | 2.901728 | 1.498394 | 2.031276 | 1.705860 | 7 B | 1.661087 | 1.622477 | 2.664865 | 3.001674 | 1.793309 | 8 B | 1.903040 | 1.823375 | 1.569739 | 2.179540 | 2.471746 |  | 6 | 7 | 8 |  |  | 6 B | 0.000000 |  |  |  |  | 7 B | 2.856851 | 0.000000 |  |  |  | 8 B | 2.596437 | 1.749882 | 0.000000 |  |  |
|                                                                                                                                        | 1                                                                                                                                                                                                                                                                                                                                                                                                                                                                                                                                                                                                                                                                                                                                                                                                                                                                                                                                                                                                                                                                                                                                                                                                                                                                                     | 2        | 3        | 4        | 5        |   |   |     |          |  |  |  |  |      |          |          |  |  |  |     |          |          |          |  |  |      |          |          |          |          |  |     |          |          |          |          |          |     |          |          |          |          |          |     |          |          |          |          |          |     |          |          |          |          |          |  |   |   |   |  |  |     |          |  |  |  |  |     |          |          |  |  |  |     |          |          |          |  |  |
| 1 B                                                                                                                                    | 0.000000                                                                                                                                                                                                                                                                                                                                                                                                                                                                                                                                                                                                                                                                                                                                                                                                                                                                                                                                                                                                                                                                                                                                                                                                                                                                              |          |          |          |          |   |   |     |          |  |  |  |  |      |          |          |  |  |  |     |          |          |          |  |  |      |          |          |          |          |  |     |          |          |          |          |          |     |          |          |          |          |          |     |          |          |          |          |          |     |          |          |          |          |          |  |   |   |   |  |  |     |          |  |  |  |  |     |          |          |  |  |  |     |          |          |          |  |  |
| 2 B                                                                                                                                    | 2.658361                                                                                                                                                                                                                                                                                                                                                                                                                                                                                                                                                                                                                                                                                                                                                                                                                                                                                                                                                                                                                                                                                                                                                                                                                                                                              | 0.000000 |          |          |          |   |   |     |          |  |  |  |  |      |          |          |  |  |  |     |          |          |          |  |  |      |          |          |          |          |  |     |          |          |          |          |          |     |          |          |          |          |          |     |          |          |          |          |          |     |          |          |          |          |          |  |   |   |   |  |  |     |          |  |  |  |  |     |          |          |  |  |  |     |          |          |          |  |  |
| 3 N                                                                                                                                    | 1.682180                                                                                                                                                                                                                                                                                                                                                                                                                                                                                                                                                                                                                                                                                                                                                                                                                                                                                                                                                                                                                                                                                                                                                                                                                                                                              | 2.758806 | 0.000000 |          |          |   |   |     |          |  |  |  |  |      |          |          |  |  |  |     |          |          |          |  |  |      |          |          |          |          |  |     |          |          |          |          |          |     |          |          |          |          |          |     |          |          |          |          |          |     |          |          |          |          |          |  |   |   |   |  |  |     |          |  |  |  |  |     |          |          |  |  |  |     |          |          |          |  |  |
| 4 Co                                                                                                                                   | 2.913798                                                                                                                                                                                                                                                                                                                                                                                                                                                                                                                                                                                                                                                                                                                                                                                                                                                                                                                                                                                                                                                                                                                                                                                                                                                                              | 1.977579 | 1.957472 | 0.000000 |          |   |   |     |          |  |  |  |  |      |          |          |  |  |  |     |          |          |          |  |  |      |          |          |          |          |  |     |          |          |          |          |          |     |          |          |          |          |          |     |          |          |          |          |          |     |          |          |          |          |          |  |   |   |   |  |  |     |          |  |  |  |  |     |          |          |  |  |  |     |          |          |          |  |  |
| 5 B                                                                                                                                    | 1.848099                                                                                                                                                                                                                                                                                                                                                                                                                                                                                                                                                                                                                                                                                                                                                                                                                                                                                                                                                                                                                                                                                                                                                                                                                                                                              | 1.790527 | 2.448347 | 2.199034 | 0.000000 |   |   |     |          |  |  |  |  |      |          |          |  |  |  |     |          |          |          |  |  |      |          |          |          |          |  |     |          |          |          |          |          |     |          |          |          |          |          |     |          |          |          |          |          |     |          |          |          |          |          |  |   |   |   |  |  |     |          |  |  |  |  |     |          |          |  |  |  |     |          |          |          |  |  |
| 6 B                                                                                                                                    | 1.784699                                                                                                                                                                                                                                                                                                                                                                                                                                                                                                                                                                                                                                                                                                                                                                                                                                                                                                                                                                                                                                                                                                                                                                                                                                                                              | 2.901728 | 1.498394 | 2.031276 | 1.705860 |   |   |     |          |  |  |  |  |      |          |          |  |  |  |     |          |          |          |  |  |      |          |          |          |          |  |     |          |          |          |          |          |     |          |          |          |          |          |     |          |          |          |          |          |     |          |          |          |          |          |  |   |   |   |  |  |     |          |  |  |  |  |     |          |          |  |  |  |     |          |          |          |  |  |
| 7 B                                                                                                                                    | 1.661087                                                                                                                                                                                                                                                                                                                                                                                                                                                                                                                                                                                                                                                                                                                                                                                                                                                                                                                                                                                                                                                                                                                                                                                                                                                                              | 1.622477 | 2.664865 | 3.001674 | 1.793309 |   |   |     |          |  |  |  |  |      |          |          |  |  |  |     |          |          |          |  |  |      |          |          |          |          |  |     |          |          |          |          |          |     |          |          |          |          |          |     |          |          |          |          |          |     |          |          |          |          |          |  |   |   |   |  |  |     |          |  |  |  |  |     |          |          |  |  |  |     |          |          |          |  |  |
| 8 B                                                                                                                                    | 1.903040                                                                                                                                                                                                                                                                                                                                                                                                                                                                                                                                                                                                                                                                                                                                                                                                                                                                                                                                                                                                                                                                                                                                                                                                                                                                              | 1.823375 | 1.569739 | 2.179540 | 2.471746 |   |   |     |          |  |  |  |  |      |          |          |  |  |  |     |          |          |          |  |  |      |          |          |          |          |  |     |          |          |          |          |          |     |          |          |          |          |          |     |          |          |          |          |          |     |          |          |          |          |          |  |   |   |   |  |  |     |          |  |  |  |  |     |          |          |  |  |  |     |          |          |          |  |  |
|                                                                                                                                        | 6                                                                                                                                                                                                                                                                                                                                                                                                                                                                                                                                                                                                                                                                                                                                                                                                                                                                                                                                                                                                                                                                                                                                                                                                                                                                                     | 7        | 8        |          |          |   |   |     |          |  |  |  |  |      |          |          |  |  |  |     |          |          |          |  |  |      |          |          |          |          |  |     |          |          |          |          |          |     |          |          |          |          |          |     |          |          |          |          |          |     |          |          |          |          |          |  |   |   |   |  |  |     |          |  |  |  |  |     |          |          |  |  |  |     |          |          |          |  |  |
| 6 B                                                                                                                                    | 0.000000                                                                                                                                                                                                                                                                                                                                                                                                                                                                                                                                                                                                                                                                                                                                                                                                                                                                                                                                                                                                                                                                                                                                                                                                                                                                              |          |          |          |          |   |   |     |          |  |  |  |  |      |          |          |  |  |  |     |          |          |          |  |  |      |          |          |          |          |  |     |          |          |          |          |          |     |          |          |          |          |          |     |          |          |          |          |          |     |          |          |          |          |          |  |   |   |   |  |  |     |          |  |  |  |  |     |          |          |  |  |  |     |          |          |          |  |  |
| 7 B                                                                                                                                    | 2.856851                                                                                                                                                                                                                                                                                                                                                                                                                                                                                                                                                                                                                                                                                                                                                                                                                                                                                                                                                                                                                                                                                                                                                                                                                                                                              | 0.000000 |          |          |          |   |   |     |          |  |  |  |  |      |          |          |  |  |  |     |          |          |          |  |  |      |          |          |          |          |  |     |          |          |          |          |          |     |          |          |          |          |          |     |          |          |          |          |          |     |          |          |          |          |          |  |   |   |   |  |  |     |          |  |  |  |  |     |          |          |  |  |  |     |          |          |          |  |  |
| 8 B                                                                                                                                    | 2.596437                                                                                                                                                                                                                                                                                                                                                                                                                                                                                                                                                                                                                                                                                                                                                                                                                                                                                                                                                                                                                                                                                                                                                                                                                                                                              | 1.749882 | 0.000000 |          |          |   |   |     |          |  |  |  |  |      |          |          |  |  |  |     |          |          |          |  |  |      |          |          |          |          |  |     |          |          |          |          |          |     |          |          |          |          |          |     |          |          |          |          |          |     |          |          |          |          |          |  |   |   |   |  |  |     |          |  |  |  |  |     |          |          |  |  |  |     |          |          |          |  |  |
|  <p>3. -1784.293360 +7.4 H/L 2.27 C<sub>s</sub></p> | <table border="1"> <thead> <tr> <th></th> <th>1</th> <th>2</th> <th>3</th> <th>4</th> <th>5</th> </tr> </thead> <tbody> <tr><td>1 B</td><td>0.000000</td><td></td><td></td><td></td><td></td></tr> <tr><td>2 Co</td><td>1.906709</td><td>0.000000</td><td></td><td></td><td></td></tr> <tr><td>3 N</td><td>1.483067</td><td>2.724859</td><td>0.000000</td><td></td><td></td></tr> <tr><td>4 B</td><td>2.641657</td><td>2.822450</td><td>1.581636</td><td>0.000000</td><td></td></tr> <tr><td>5 B</td><td>1.858549</td><td>2.143325</td><td>1.694717</td><td>1.888140</td><td>0.000000</td></tr> <tr><td>6 B</td><td>1.858549</td><td>2.143325</td><td>1.694717</td><td>1.888140</td><td>2.576400</td></tr> <tr><td>7 B</td><td>2.944396</td><td>2.083704</td><td>2.680456</td><td>1.741425</td><td>2.655804</td></tr> <tr><td>8 B</td><td>2.944396</td><td>2.083704</td><td>2.680456</td><td>1.741425</td><td>1.677984</td></tr> <tr> <td></td> <td>6</td> <td>7</td> <td>8</td> <td></td> <td></td> </tr> <tr><td>6 B</td><td>0.000000</td><td></td><td></td><td></td><td></td></tr> <tr><td>7 B</td><td>1.677984</td><td>0.000000</td><td></td><td></td><td></td></tr> <tr><td>8 B</td><td>2.655804</td><td>1.644800</td><td>0.000000</td><td></td><td></td></tr> </tbody> </table> |          | 1        | 2        | 3        | 4 | 5 | 1 B | 0.000000 |  |  |  |  | 2 Co | 1.906709 | 0.000000 |  |  |  | 3 N | 1.483067 | 2.724859 | 0.000000 |  |  | 4 B  | 2.641657 | 2.822450 | 1.581636 | 0.000000 |  | 5 B | 1.858549 | 2.143325 | 1.694717 | 1.888140 | 0.000000 | 6 B | 1.858549 | 2.143325 | 1.694717 | 1.888140 | 2.576400 | 7 B | 2.944396 | 2.083704 | 2.680456 | 1.741425 | 2.655804 | 8 B | 2.944396 | 2.083704 | 2.680456 | 1.741425 | 1.677984 |  | 6 | 7 | 8 |  |  | 6 B | 0.000000 |  |  |  |  | 7 B | 1.677984 | 0.000000 |  |  |  | 8 B | 2.655804 | 1.644800 | 0.000000 |  |  |
|                                                                                                                                        | 1                                                                                                                                                                                                                                                                                                                                                                                                                                                                                                                                                                                                                                                                                                                                                                                                                                                                                                                                                                                                                                                                                                                                                                                                                                                                                     | 2        | 3        | 4        | 5        |   |   |     |          |  |  |  |  |      |          |          |  |  |  |     |          |          |          |  |  |      |          |          |          |          |  |     |          |          |          |          |          |     |          |          |          |          |          |     |          |          |          |          |          |     |          |          |          |          |          |  |   |   |   |  |  |     |          |  |  |  |  |     |          |          |  |  |  |     |          |          |          |  |  |
| 1 B                                                                                                                                    | 0.000000                                                                                                                                                                                                                                                                                                                                                                                                                                                                                                                                                                                                                                                                                                                                                                                                                                                                                                                                                                                                                                                                                                                                                                                                                                                                              |          |          |          |          |   |   |     |          |  |  |  |  |      |          |          |  |  |  |     |          |          |          |  |  |      |          |          |          |          |  |     |          |          |          |          |          |     |          |          |          |          |          |     |          |          |          |          |          |     |          |          |          |          |          |  |   |   |   |  |  |     |          |  |  |  |  |     |          |          |  |  |  |     |          |          |          |  |  |
| 2 Co                                                                                                                                   | 1.906709                                                                                                                                                                                                                                                                                                                                                                                                                                                                                                                                                                                                                                                                                                                                                                                                                                                                                                                                                                                                                                                                                                                                                                                                                                                                              | 0.000000 |          |          |          |   |   |     |          |  |  |  |  |      |          |          |  |  |  |     |          |          |          |  |  |      |          |          |          |          |  |     |          |          |          |          |          |     |          |          |          |          |          |     |          |          |          |          |          |     |          |          |          |          |          |  |   |   |   |  |  |     |          |  |  |  |  |     |          |          |  |  |  |     |          |          |          |  |  |
| 3 N                                                                                                                                    | 1.483067                                                                                                                                                                                                                                                                                                                                                                                                                                                                                                                                                                                                                                                                                                                                                                                                                                                                                                                                                                                                                                                                                                                                                                                                                                                                              | 2.724859 | 0.000000 |          |          |   |   |     |          |  |  |  |  |      |          |          |  |  |  |     |          |          |          |  |  |      |          |          |          |          |  |     |          |          |          |          |          |     |          |          |          |          |          |     |          |          |          |          |          |     |          |          |          |          |          |  |   |   |   |  |  |     |          |  |  |  |  |     |          |          |  |  |  |     |          |          |          |  |  |
| 4 B                                                                                                                                    | 2.641657                                                                                                                                                                                                                                                                                                                                                                                                                                                                                                                                                                                                                                                                                                                                                                                                                                                                                                                                                                                                                                                                                                                                                                                                                                                                              | 2.822450 | 1.581636 | 0.000000 |          |   |   |     |          |  |  |  |  |      |          |          |  |  |  |     |          |          |          |  |  |      |          |          |          |          |  |     |          |          |          |          |          |     |          |          |          |          |          |     |          |          |          |          |          |     |          |          |          |          |          |  |   |   |   |  |  |     |          |  |  |  |  |     |          |          |  |  |  |     |          |          |          |  |  |
| 5 B                                                                                                                                    | 1.858549                                                                                                                                                                                                                                                                                                                                                                                                                                                                                                                                                                                                                                                                                                                                                                                                                                                                                                                                                                                                                                                                                                                                                                                                                                                                              | 2.143325 | 1.694717 | 1.888140 | 0.000000 |   |   |     |          |  |  |  |  |      |          |          |  |  |  |     |          |          |          |  |  |      |          |          |          |          |  |     |          |          |          |          |          |     |          |          |          |          |          |     |          |          |          |          |          |     |          |          |          |          |          |  |   |   |   |  |  |     |          |  |  |  |  |     |          |          |  |  |  |     |          |          |          |  |  |
| 6 B                                                                                                                                    | 1.858549                                                                                                                                                                                                                                                                                                                                                                                                                                                                                                                                                                                                                                                                                                                                                                                                                                                                                                                                                                                                                                                                                                                                                                                                                                                                              | 2.143325 | 1.694717 | 1.888140 | 2.576400 |   |   |     |          |  |  |  |  |      |          |          |  |  |  |     |          |          |          |  |  |      |          |          |          |          |  |     |          |          |          |          |          |     |          |          |          |          |          |     |          |          |          |          |          |     |          |          |          |          |          |  |   |   |   |  |  |     |          |  |  |  |  |     |          |          |  |  |  |     |          |          |          |  |  |
| 7 B                                                                                                                                    | 2.944396                                                                                                                                                                                                                                                                                                                                                                                                                                                                                                                                                                                                                                                                                                                                                                                                                                                                                                                                                                                                                                                                                                                                                                                                                                                                              | 2.083704 | 2.680456 | 1.741425 | 2.655804 |   |   |     |          |  |  |  |  |      |          |          |  |  |  |     |          |          |          |  |  |      |          |          |          |          |  |     |          |          |          |          |          |     |          |          |          |          |          |     |          |          |          |          |          |     |          |          |          |          |          |  |   |   |   |  |  |     |          |  |  |  |  |     |          |          |  |  |  |     |          |          |          |  |  |
| 8 B                                                                                                                                    | 2.944396                                                                                                                                                                                                                                                                                                                                                                                                                                                                                                                                                                                                                                                                                                                                                                                                                                                                                                                                                                                                                                                                                                                                                                                                                                                                              | 2.083704 | 2.680456 | 1.741425 | 1.677984 |   |   |     |          |  |  |  |  |      |          |          |  |  |  |     |          |          |          |  |  |      |          |          |          |          |  |     |          |          |          |          |          |     |          |          |          |          |          |     |          |          |          |          |          |     |          |          |          |          |          |  |   |   |   |  |  |     |          |  |  |  |  |     |          |          |  |  |  |     |          |          |          |  |  |
|                                                                                                                                        | 6                                                                                                                                                                                                                                                                                                                                                                                                                                                                                                                                                                                                                                                                                                                                                                                                                                                                                                                                                                                                                                                                                                                                                                                                                                                                                     | 7        | 8        |          |          |   |   |     |          |  |  |  |  |      |          |          |  |  |  |     |          |          |          |  |  |      |          |          |          |          |  |     |          |          |          |          |          |     |          |          |          |          |          |     |          |          |          |          |          |     |          |          |          |          |          |  |   |   |   |  |  |     |          |  |  |  |  |     |          |          |  |  |  |     |          |          |          |  |  |
| 6 B                                                                                                                                    | 0.000000                                                                                                                                                                                                                                                                                                                                                                                                                                                                                                                                                                                                                                                                                                                                                                                                                                                                                                                                                                                                                                                                                                                                                                                                                                                                              |          |          |          |          |   |   |     |          |  |  |  |  |      |          |          |  |  |  |     |          |          |          |  |  |      |          |          |          |          |  |     |          |          |          |          |          |     |          |          |          |          |          |     |          |          |          |          |          |     |          |          |          |          |          |  |   |   |   |  |  |     |          |  |  |  |  |     |          |          |  |  |  |     |          |          |          |  |  |
| 7 B                                                                                                                                    | 1.677984                                                                                                                                                                                                                                                                                                                                                                                                                                                                                                                                                                                                                                                                                                                                                                                                                                                                                                                                                                                                                                                                                                                                                                                                                                                                              | 0.000000 |          |          |          |   |   |     |          |  |  |  |  |      |          |          |  |  |  |     |          |          |          |  |  |      |          |          |          |          |  |     |          |          |          |          |          |     |          |          |          |          |          |     |          |          |          |          |          |     |          |          |          |          |          |  |   |   |   |  |  |     |          |  |  |  |  |     |          |          |  |  |  |     |          |          |          |  |  |
| 8 B                                                                                                                                    | 2.655804                                                                                                                                                                                                                                                                                                                                                                                                                                                                                                                                                                                                                                                                                                                                                                                                                                                                                                                                                                                                                                                                                                                                                                                                                                                                              | 1.644800 | 0.000000 |          |          |   |   |     |          |  |  |  |  |      |          |          |  |  |  |     |          |          |          |  |  |      |          |          |          |          |  |     |          |          |          |          |          |     |          |          |          |          |          |     |          |          |          |          |          |     |          |          |          |          |          |  |   |   |   |  |  |     |          |  |  |  |  |     |          |          |  |  |  |     |          |          |          |  |  |

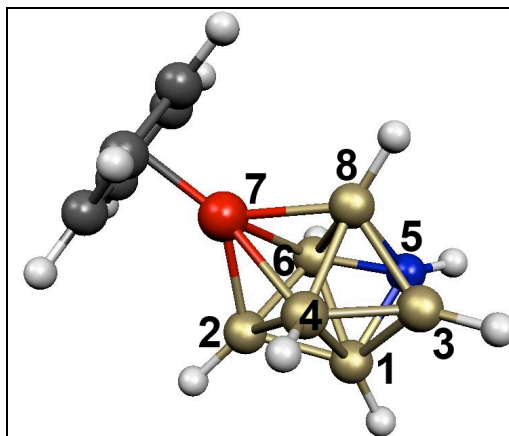

4. -1784.288443 +10.5 H/L 2.27 C<sub>1</sub>

|      | 1        | 2        | 3        | 4        | 5        |
|------|----------|----------|----------|----------|----------|
| 1 B  | 0.000000 |          |          |          |          |
| 2 B  | 1.694887 | 0.000000 |          |          |          |
| 3 B  | 1.797241 | 2.865678 | 0.000000 |          |          |
| 4 B  | 1.914251 | 1.825545 | 1.672761 | 0.000000 |          |
| 5 N  | 1.626761 | 2.668260 | 1.500285 | 2.415669 | 0.000000 |
| 6 B  | 1.878071 | 1.771267 | 2.624455 | 2.487454 | 1.580143 |
| 7 Co | 3.010911 | 1.885997 | 3.220518 | 2.099504 | 3.028487 |
| 8 B  | 2.545880 | 2.653140 | 1.793725 | 1.825221 | 1.727743 |
|      |          | 6        | 7        | 8        |          |
| 6 B  | 0.000000 |          |          |          |          |
| 7 Co | 2.037312 | 0.000000 |          |          |          |
| 8 B  | 1.936111 | 1.937272 | 0.000000 |          |          |

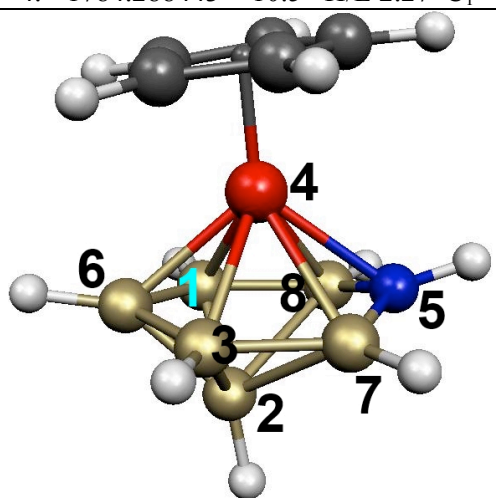

5. -1784.281127 +15.1 H/L 2.23 C<sub>s</sub>

|      | 1        | 2        | 3        | 4        | 5        |
|------|----------|----------|----------|----------|----------|
| 1 B  | 0.000000 |          |          |          |          |
| 2 B  | 1.723262 | 0.000000 |          |          |          |
| 3 B  | 2.668800 | 1.723351 | 0.000000 |          |          |
| 4 Co | 2.135899 | 2.595351 | 2.136503 | 0.000000 |          |
| 5 N  | 2.725953 | 2.437015 | 2.725850 | 2.097651 | 0.000000 |
| 6 B  | 1.642240 | 1.724746 | 1.642254 | 2.139420 | 3.312089 |
| 7 B  | 3.074754 | 2.113422 | 1.681576 | 2.218835 | 1.446072 |
| 8 B  | 1.681628 | 2.113261 | 3.074679 | 2.218319 | 1.446149 |
|      |          | 6        | 7        | 8        |          |
| 6 B  | 0.000000 |          |          |          |          |
| 7 B  | 2.909360 | 0.000000 |          |          |          |
| 8 B  | 2.909346 | 2.482800 | 0.000000 |          |          |

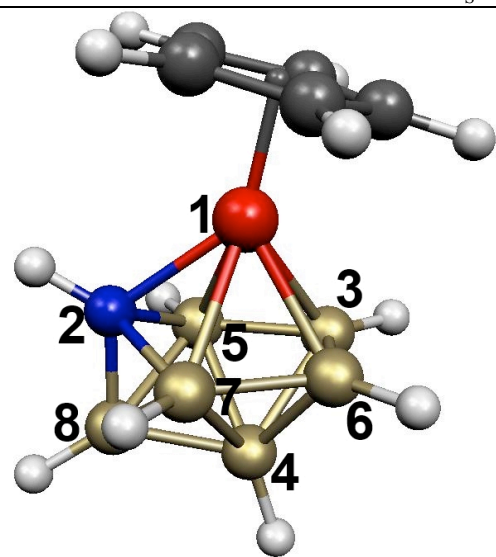

6. -1784.279751 +16.0 H/L 2.36 C<sub>s</sub>

|      | 1        | 2        | 3        | 4        | 5        |
|------|----------|----------|----------|----------|----------|
| 1 Co | 0.000000 |          |          |          |          |
| 2 N  | 1.936817 | 0.000000 |          |          |          |
| 3 B  | 2.073725 | 2.761794 | 0.000000 |          |          |
| 4 B  | 2.887389 | 2.411368 | 1.783406 | 0.000000 |          |
| 5 B  | 2.168468 | 1.667691 | 1.696322 | 1.893451 | 0.000000 |
| 6 B  | 2.073825 | 2.761815 | 1.629400 | 1.783469 | 2.642538 |
| 7 B  | 2.168540 | 1.667735 | 2.642471 | 1.893530 | 2.519600 |
| 8 B  | 3.030316 | 1.466638 | 2.883402 | 1.666867 | 1.836445 |
|      |          | 6        | 7        | 8        |          |
| 6 B  | 0.000000 |          |          |          |          |
| 7 B  | 1.696254 | 0.000000 |          |          |          |
| 8 B  | 2.883431 | 1.836548 | 0.000000 |          |          |

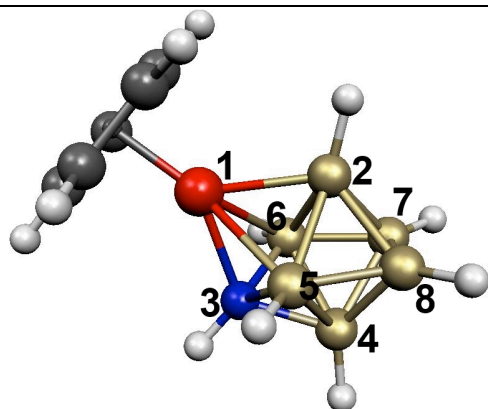

|      |          |          |          |          |          |
|------|----------|----------|----------|----------|----------|
| 1 Co | 0.000000 |          |          |          |          |
| 2 B  | 1.995536 | 0.000000 |          |          |          |
| 3 N  | 1.866798 | 2.432936 | 0.000000 |          |          |
| 4 B  | 3.093362 | 2.494796 | 1.592839 | 0.000000 |          |
| 5 B  | 2.148513 | 1.925204 | 1.606548 | 1.861082 | 0.000000 |
| 6 B  | 2.147600 | 1.929340 | 1.606397 | 1.860010 | 2.491930 |
| 7 B  | 3.264160 | 1.785391 | 2.658234 | 1.753441 | 2.634951 |
| 8 B  | 3.265584 | 1.783668 | 2.658805 | 1.754064 | 1.706313 |
|      |          | 6        | 7        | 8        |          |
| 6 B  | 0.000000 |          |          |          |          |
| 7 B  | 1.705737 | 0.000000 |          |          |          |
| 8 B  | 2.635629 | 1.618919 | 0.000000 |          |          |

7. -1784.273905 +19.6 H/L 1.56 C<sub>s</sub>

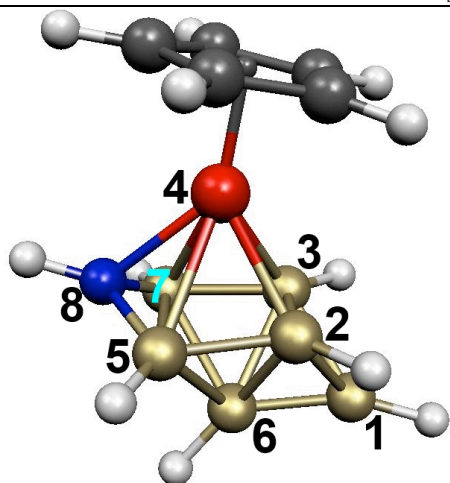

|      | 1        | 2        | 3        | 4        | 5        |
|------|----------|----------|----------|----------|----------|
| 1 B  | 0.000000 |          |          |          |          |
| 2 B  | 1.728401 | 0.000000 |          |          |          |
| 3 B  | 1.728783 | 1.725100 | 0.000000 |          |          |
| 4 Co | 3.363873 | 2.057415 | 2.057914 | 0.000000 |          |
| 5 B  | 2.990896 | 1.705728 | 2.612007 | 2.191509 | 0.000000 |
| 6 B  | 1.613535 | 1.806792 | 1.806880 | 3.015014 | 1.947238 |
| 7 B  | 2.991455 | 2.611999 | 1.705733 | 2.191641 | 2.268300 |
| 8 N  | 3.693524 | 2.635622 | 2.635730 | 1.930533 | 1.470989 |
|      |          | 6        | 7        | 8        |          |
| 6 B  | 0.000000 |          |          |          |          |
| 7 B  | 1.947769 | 0.000000 |          |          |          |
| 8 N  | 2.483644 | 1.470980 | 0.000000 |          |          |

8. -1784.264678 +25.4 H/L 1.63 C<sub>s</sub>

Table S1C. Energy ranking for all of the CpCoNHB<sub>6</sub>H<sub>6</sub> optimized structures:

| No | Initial structure        | Final energy (a.u.) | $\Delta E$ ( kcal/mol) |
|----|--------------------------|---------------------|------------------------|
| 1  | DicapTrPr-Cs-Co2-f       | -1784.1558735       | 0.00                   |
| 2  | DicapTrPr-C2v-Co1-a      | -1784.1558727       | 0.00                   |
| 3  | DicapTrPr-C2v-Co1-b      | -1784.1558727       | 0.00                   |
| 4  | DicapTrPr-Cs-Co3-g       | -1784.1558726       | 0.00                   |
| 5  | PrTrig-Co-d              | -1784.1558723       | 0.00                   |
| 6  | Antipr-Co-a              | -1784.1558717       | 0.00                   |
| 7  | DicapTrPr-C2v-Co1-d      | -1784.1558717       | 0.00                   |
| 8  | Bisdisph-Co1-a           | -1784.1558716       | 0.00                   |
| 9  | DicapOh-Co2-g            | -1784.1558716       | 0.00                   |
| 10 | DicapTrPr-Cs-Co1-d       | -1784.1558716       | 0.00                   |
| 11 | DicapTrPr-Cs-Co2-a       | -1784.1558716       | 0.00                   |
| 12 | DicapTrPr-Cs-Co3-a       | -1784.1558716       | 0.00                   |
| 13 | Nido-Co-a                | -1784.1558716       | 0.00                   |
| 14 | DicapOh-Co3-c            | -1784.1558715       | 0.00                   |
| 15 | Bisdisph-Co2-c_r-47      | -1784.1558714       | 0.00                   |
| 16 | Tdallcap-Co-a            | -1784.1558714       | 0.00                   |
| 17 | DicapTrPr-C2v-Co3-b      | -1784.1558713       | 0.00                   |
| 18 | Bisdisph-Co2-d           | -1784.1558712       | 0.00                   |
| 19 | DicapTrPr-C2v-Co3-c      | -1784.1558706       | 0.00                   |
| 20 | Bipirhex-Co2-a_r-68      | -1784.1558705       | 0.00                   |
| 21 | DicapTrPr-Cs-Co1-e       | -1784.1558704       | 0.00                   |
| 22 | DicapTrPr-C2v-Co2-b_r-42 | -1784.1558703       | 0.00                   |
| 23 | Antipr-Co-b              | -1784.1558694       | 0.00                   |
| 24 | AntiprTrig-Co-b          | -1784.1558694       | 0.00                   |
| 25 | AntiprTrig-Co-c          | -1784.1558694       | 0.00                   |
| 26 | DicapTrPr-Cs-Co3-b       | -1784.1558692       | 0.00                   |
| 27 | Bisdisph-Co1-b           | -1784.1558684       | 0.00                   |
| 28 | DicapOh-Co3-a            | -1784.1558651       | 0.01                   |
| 29 | Nido-Co-b                | -1784.1558629       | 0.01                   |
| 30 | DicapTrPr-Cs-Co4-d       | -1784.1558618       | 0.01                   |
| 31 | DicapOh-Co2-b            | -1784.1558140       | 0.04                   |
| 32 | DicapTrPr-C2v-Co2-a      | -1784.1557295       | 0.09                   |
| 33 | Nido-Co-c                | -1784.1555175       | 0.22                   |
| 34 | Tdallcap-Co-b            | -1784.1554390       | 0.27                   |
| 35 | Cub-Co-b                 | -1784.1554389       | 0.27                   |
| 36 | PrTrig-Co-e              | -1784.1554380       | 0.27                   |
| 37 | DicapOh-Co2-d            | -1784.1554379       | 0.27                   |
| 38 | AntiprTrig-Co-e_r-43     | -1784.1554373       | 0.27                   |
| 39 | DicapOh-Co2-f            | -1784.1554358       | 0.27                   |
| 40 | AntiprTrig-Co-e_i-43     | -1784.1554137       | 0.29                   |
| 41 | DicapTrPr-C2v-Co2-b_i-42 | -1784.1554124       | 0.29                   |

|    |                           |               |       |
|----|---------------------------|---------------|-------|
| 42 | Bisdisph-Co1-d            | -1784.1475177 | 5.24  |
| 43 | Antipr-Co-c               | -1784.1475131 | 5.25  |
| 44 | AntiprTrig-Co-d           | -1784.1475131 | 5.25  |
| 45 | DicapTrPr-Cs-Co3-c        | -1784.1475130 | 5.25  |
| 46 | DicapTrPr-Cs-Co1-c        | -1784.1475121 | 5.25  |
| 47 | DicapTrPr-C2v-Co3-d       | -1784.1475110 | 5.25  |
| 48 | DicapTrPr-C2v-Co1-f       | -1784.1475100 | 5.25  |
| 49 | Tdallcap-Co-c             | -1784.1475099 | 5.25  |
| 50 | Bisdisph-Co1-e r-497      | -1784.1475009 | 5.25  |
| 51 | DicapTrPr-Cs-Co1-b        | -1784.1474983 | 5.26  |
| 52 | Nido-Co-d                 | -1784.1474934 | 5.26  |
| 53 | Cub-Co-c                  | -1784.1474929 | 5.26  |
| 54 | DicapOh-Co2-c             | -1784.1457371 | 6.36  |
| 55 | Bipirhex-Co1-a            | -1784.1457358 | 6.36  |
| 56 | Antipr-Co-d               | -1784.1414718 | 9.04  |
| 57 | DicapOh-Co1-c             | -1784.1414709 | 9.04  |
| 58 | DicapTrPr-C2v-Co2-c r-180 | -1784.1414705 | 9.04  |
| 59 | DicapTrPr-Cs-Co4-b        | -1784.1414704 | 9.04  |
| 60 | DicapTrPr-C2v-Co1-c       | -1784.1414701 | 9.04  |
| 61 | DicapTrPr-Cs-Co4-e        | -1784.1414701 | 9.04  |
| 62 | Bisdisph-Co2-e            | -1784.1414700 | 9.04  |
| 63 | DicapTrPr-C2v-Co3-a r-173 | -1784.1414700 | 9.04  |
| 64 | Bisdisph-Co2-b            | -1784.1414695 | 9.04  |
| 65 | DicapTrPr-C2v-Co1-e       | -1784.1414694 | 9.04  |
| 66 | DicapTrPr-Cs-Co3-d        | -1784.1414680 | 9.04  |
| 67 | DicapTrPr-Cs-Co2-e        | -1784.1414552 | 9.05  |
| 68 | DicapTrPr-C2v-Co2-d       | -1784.1414263 | 9.07  |
| 69 | DicapTrPr-C2v-Co1-g       | -1784.1382353 | 11.07 |
| 70 | DicapTrPr-Cs-Co2-d        | -1784.1382353 | 11.07 |
| 71 | Bisdisph-Co2-a r-441      | -1784.1347463 | 13.26 |
| 72 | Bisdisph-Co1-c            | -1784.1347453 | 13.26 |
| 73 | DicapTrPr-Cs-Co1-a        | -1784.1347347 | 13.27 |
| 74 | DicapTrPr-Cs-Co2-b        | -1784.1346340 | 13.33 |
| 75 | DicapTrPr-C2v-Co3-a i-173 | -1784.1331043 | 14.29 |
| 76 | DicapTrPr-C2v-Co2-c i-180 | -1784.1324933 | 14.67 |
| 77 | Bisdisph-Co2-c i-47       | -1784.1279734 | 17.51 |
| 78 | Bipirhex-Co2-b r-45       | -1784.1222004 | 21.13 |
| 79 | Bipirhex-Co2-b i-45       | -1784.1218925 | 21.32 |
| 80 | DicapOh-Co1-b             | -1784.1209862 | 21.89 |
| 81 | PrTrig-Co-c               | -1784.1209827 | 21.89 |
| 82 | DicapTrPr-Cs-Co3-e        | -1784.1209825 | 21.89 |
| 83 | DicapTrPr-Cs-Co2-c        | -1784.1209815 | 21.90 |
| 84 | DicapOh-Co2-e             | -1784.1209811 | 21.90 |
| 85 | Bipirhex-Co2-d            | -1784.1192696 | 22.97 |

|     |                      |               |       |
|-----|----------------------|---------------|-------|
| 86  | Cub-Co-a             | -1784.1183588 | 23.54 |
| 87  | AntiprTrig-Co-a      | -1784.1182961 | 23.58 |
| 88  | PrTrig-Co-a          | -1784.1182805 | 23.59 |
| 89  | DicapOh-Co3-b        | -1784.1170684 | 24.35 |
| 90  | Bipirhex-Co2-c       | -1784.1142164 | 26.14 |
| 91  | DicapTrPr-Cs-Co3-f   | -1784.1085913 | 29.67 |
| 92  | DicapOh-Co1-a        | -1784.1085536 | 29.69 |
| 93  | DicapTrPr-Cs-Co4-c   | -1784.1085493 | 29.70 |
| 94  | DicapTrPr-Cs-Co4-a   | -1784.1085212 | 29.71 |
| 95  | Bisdisph-Co1-e i-497 | -1784.1054481 | 31.64 |
| 96  | DicapOh-Co2-a        | -1784.1024619 | 33.52 |
| 97  | PrTrig-Co-b          | -1784.0917363 | 40.25 |
| 98  | Bisdisph-Co2-a i-441 | -1784.0828017 | 45.85 |
| 99  | Bipirhex-Co1-b       | -1784.0742242 | 51.24 |
| 100 | Bipirhex-Co2-a i-68  | -1784.0697028 | 54.07 |
| 101 | DicapTrPr-Cs-Co2-g   | -1784.0498135 | 66.55 |



Table S2A. Initial CpCoNHB<sub>7</sub>H<sub>7</sub> structures, 68 in all.

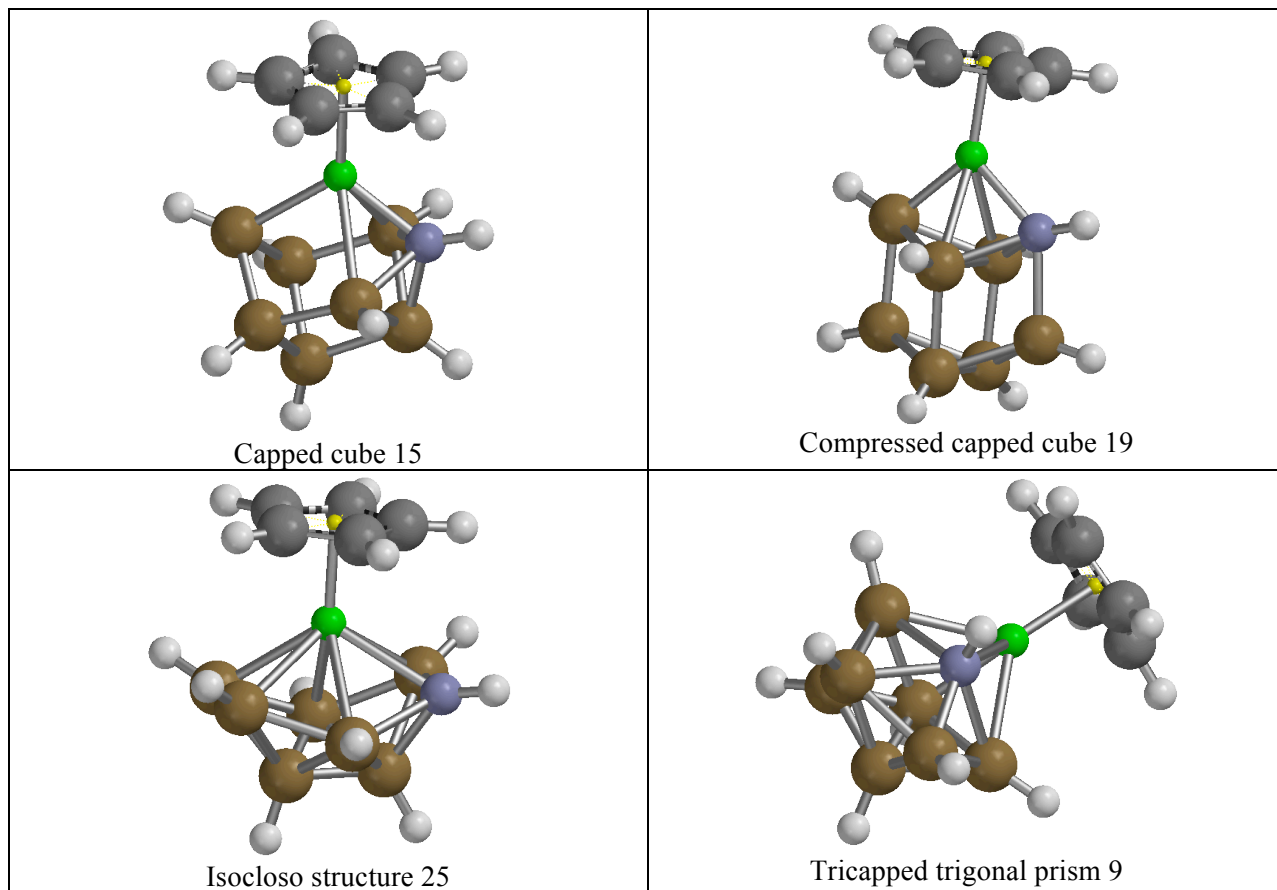

Table S2B. Distance table for the lowest-lying CpCoNHB<sub>7</sub>H<sub>7</sub> structures after M06L/6-311G(d,p) optimization. Included are the ZPcorrected E (a.u.), relative energy (kcal/mol), HOMO/LUMO gaps (eV) and symmetry.

| 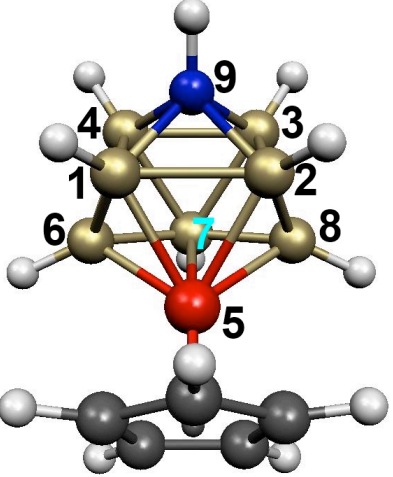 <p>1. -1809.778116 0.0 H/L 2.35 C<sub>s</sub></p>     | <table border="1"> <thead> <tr> <th></th> <th>1</th> <th>2</th> <th>3</th> <th>4</th> <th>5</th> </tr> </thead> <tbody> <tr><td>1 B</td><td>0.000000</td><td></td><td></td><td></td><td></td></tr> <tr><td>2 B</td><td>2.019500</td><td>0.000000</td><td></td><td></td><td></td></tr> <tr><td>3 B</td><td>2.672809</td><td>1.808398</td><td>0.000000</td><td></td><td></td></tr> <tr><td>4 B</td><td>1.808322</td><td>2.672833</td><td>1.918200</td><td>0.000000</td><td></td></tr> <tr><td>5 Co</td><td>2.087612</td><td>2.087661</td><td>2.944617</td><td>2.944606</td><td>0.000000</td></tr> <tr><td>6 B</td><td>1.703671</td><td>2.964852</td><td>2.901322</td><td>1.680895</td><td>1.975470</td></tr> <tr><td>7 B</td><td>2.616404</td><td>2.616443</td><td>1.858593</td><td>1.858652</td><td>2.140943</td></tr> <tr><td>8 B</td><td>2.964823</td><td>1.703739</td><td>1.680895</td><td>2.901342</td><td>1.975501</td></tr> <tr><td>9 N</td><td>1.581038</td><td>1.581102</td><td>1.592346</td><td>1.592266</td><td>2.905443</td></tr> <tr> <th></th> <th>6</th> <th>7</th> <th>8</th> <th>9</th> <th></th> </tr> <tr><td>6 B</td><td>0.000000</td><td></td><td></td><td></td><td></td></tr> <tr><td>7 B</td><td>1.717794</td><td>0.000000</td><td></td><td></td><td></td></tr> <tr><td>8 B</td><td>2.915400</td><td>1.717747</td><td>0.000000</td><td></td><td></td></tr> <tr><td>9 N</td><td>2.643145</td><td>2.623408</td><td>2.643204</td><td>0.000000</td><td></td></tr> </tbody> </table>  |          | 1        | 2        | 3        | 4 | 5 | 1 B  | 0.000000 |  |  |  |  | 2 B | 2.019500 | 0.000000 |  |  |  | 3 B | 2.672809 | 1.808398 | 0.000000 |  |  | 4 B | 1.808322 | 2.672833 | 1.918200 | 0.000000 |  | 5 Co | 2.087612 | 2.087661 | 2.944617 | 2.944606 | 0.000000 | 6 B | 1.703671 | 2.964852 | 2.901322 | 1.680895 | 1.975470 | 7 B | 2.616404 | 2.616443 | 1.858593 | 1.858652 | 2.140943 | 8 B  | 2.964823 | 1.703739 | 1.680895 | 2.901342 | 1.975501 | 9 N | 1.581038 | 1.581102 | 1.592346 | 1.592266 | 2.905443 |  | 6 | 7 | 8 | 9 |  | 6 B | 0.000000 |  |  |  |  | 7 B | 1.717794 | 0.000000 |  |  |  | 8 B  | 2.915400 | 1.717747 | 0.000000 |  |  | 9 N | 2.643145 | 2.623408 | 2.643204 | 0.000000 |  |
|-----------------------------------------------------------------------------------------------------------------------------------------|-------------------------------------------------------------------------------------------------------------------------------------------------------------------------------------------------------------------------------------------------------------------------------------------------------------------------------------------------------------------------------------------------------------------------------------------------------------------------------------------------------------------------------------------------------------------------------------------------------------------------------------------------------------------------------------------------------------------------------------------------------------------------------------------------------------------------------------------------------------------------------------------------------------------------------------------------------------------------------------------------------------------------------------------------------------------------------------------------------------------------------------------------------------------------------------------------------------------------------------------------------------------------------------------------------------------------------------------------------------------------------------------------------------------------------------------------------------------------------------------------------|----------|----------|----------|----------|---|---|------|----------|--|--|--|--|-----|----------|----------|--|--|--|-----|----------|----------|----------|--|--|-----|----------|----------|----------|----------|--|------|----------|----------|----------|----------|----------|-----|----------|----------|----------|----------|----------|-----|----------|----------|----------|----------|----------|------|----------|----------|----------|----------|----------|-----|----------|----------|----------|----------|----------|--|---|---|---|---|--|-----|----------|--|--|--|--|-----|----------|----------|--|--|--|------|----------|----------|----------|--|--|-----|----------|----------|----------|----------|--|
|                                                                                                                                         | 1                                                                                                                                                                                                                                                                                                                                                                                                                                                                                                                                                                                                                                                                                                                                                                                                                                                                                                                                                                                                                                                                                                                                                                                                                                                                                                                                                                                                                                                                                                     | 2        | 3        | 4        | 5        |   |   |      |          |  |  |  |  |     |          |          |  |  |  |     |          |          |          |  |  |     |          |          |          |          |  |      |          |          |          |          |          |     |          |          |          |          |          |     |          |          |          |          |          |      |          |          |          |          |          |     |          |          |          |          |          |  |   |   |   |   |  |     |          |  |  |  |  |     |          |          |  |  |  |      |          |          |          |  |  |     |          |          |          |          |  |
| 1 B                                                                                                                                     | 0.000000                                                                                                                                                                                                                                                                                                                                                                                                                                                                                                                                                                                                                                                                                                                                                                                                                                                                                                                                                                                                                                                                                                                                                                                                                                                                                                                                                                                                                                                                                              |          |          |          |          |   |   |      |          |  |  |  |  |     |          |          |  |  |  |     |          |          |          |  |  |     |          |          |          |          |  |      |          |          |          |          |          |     |          |          |          |          |          |     |          |          |          |          |          |      |          |          |          |          |          |     |          |          |          |          |          |  |   |   |   |   |  |     |          |  |  |  |  |     |          |          |  |  |  |      |          |          |          |  |  |     |          |          |          |          |  |
| 2 B                                                                                                                                     | 2.019500                                                                                                                                                                                                                                                                                                                                                                                                                                                                                                                                                                                                                                                                                                                                                                                                                                                                                                                                                                                                                                                                                                                                                                                                                                                                                                                                                                                                                                                                                              | 0.000000 |          |          |          |   |   |      |          |  |  |  |  |     |          |          |  |  |  |     |          |          |          |  |  |     |          |          |          |          |  |      |          |          |          |          |          |     |          |          |          |          |          |     |          |          |          |          |          |      |          |          |          |          |          |     |          |          |          |          |          |  |   |   |   |   |  |     |          |  |  |  |  |     |          |          |  |  |  |      |          |          |          |  |  |     |          |          |          |          |  |
| 3 B                                                                                                                                     | 2.672809                                                                                                                                                                                                                                                                                                                                                                                                                                                                                                                                                                                                                                                                                                                                                                                                                                                                                                                                                                                                                                                                                                                                                                                                                                                                                                                                                                                                                                                                                              | 1.808398 | 0.000000 |          |          |   |   |      |          |  |  |  |  |     |          |          |  |  |  |     |          |          |          |  |  |     |          |          |          |          |  |      |          |          |          |          |          |     |          |          |          |          |          |     |          |          |          |          |          |      |          |          |          |          |          |     |          |          |          |          |          |  |   |   |   |   |  |     |          |  |  |  |  |     |          |          |  |  |  |      |          |          |          |  |  |     |          |          |          |          |  |
| 4 B                                                                                                                                     | 1.808322                                                                                                                                                                                                                                                                                                                                                                                                                                                                                                                                                                                                                                                                                                                                                                                                                                                                                                                                                                                                                                                                                                                                                                                                                                                                                                                                                                                                                                                                                              | 2.672833 | 1.918200 | 0.000000 |          |   |   |      |          |  |  |  |  |     |          |          |  |  |  |     |          |          |          |  |  |     |          |          |          |          |  |      |          |          |          |          |          |     |          |          |          |          |          |     |          |          |          |          |          |      |          |          |          |          |          |     |          |          |          |          |          |  |   |   |   |   |  |     |          |  |  |  |  |     |          |          |  |  |  |      |          |          |          |  |  |     |          |          |          |          |  |
| 5 Co                                                                                                                                    | 2.087612                                                                                                                                                                                                                                                                                                                                                                                                                                                                                                                                                                                                                                                                                                                                                                                                                                                                                                                                                                                                                                                                                                                                                                                                                                                                                                                                                                                                                                                                                              | 2.087661 | 2.944617 | 2.944606 | 0.000000 |   |   |      |          |  |  |  |  |     |          |          |  |  |  |     |          |          |          |  |  |     |          |          |          |          |  |      |          |          |          |          |          |     |          |          |          |          |          |     |          |          |          |          |          |      |          |          |          |          |          |     |          |          |          |          |          |  |   |   |   |   |  |     |          |  |  |  |  |     |          |          |  |  |  |      |          |          |          |  |  |     |          |          |          |          |  |
| 6 B                                                                                                                                     | 1.703671                                                                                                                                                                                                                                                                                                                                                                                                                                                                                                                                                                                                                                                                                                                                                                                                                                                                                                                                                                                                                                                                                                                                                                                                                                                                                                                                                                                                                                                                                              | 2.964852 | 2.901322 | 1.680895 | 1.975470 |   |   |      |          |  |  |  |  |     |          |          |  |  |  |     |          |          |          |  |  |     |          |          |          |          |  |      |          |          |          |          |          |     |          |          |          |          |          |     |          |          |          |          |          |      |          |          |          |          |          |     |          |          |          |          |          |  |   |   |   |   |  |     |          |  |  |  |  |     |          |          |  |  |  |      |          |          |          |  |  |     |          |          |          |          |  |
| 7 B                                                                                                                                     | 2.616404                                                                                                                                                                                                                                                                                                                                                                                                                                                                                                                                                                                                                                                                                                                                                                                                                                                                                                                                                                                                                                                                                                                                                                                                                                                                                                                                                                                                                                                                                              | 2.616443 | 1.858593 | 1.858652 | 2.140943 |   |   |      |          |  |  |  |  |     |          |          |  |  |  |     |          |          |          |  |  |     |          |          |          |          |  |      |          |          |          |          |          |     |          |          |          |          |          |     |          |          |          |          |          |      |          |          |          |          |          |     |          |          |          |          |          |  |   |   |   |   |  |     |          |  |  |  |  |     |          |          |  |  |  |      |          |          |          |  |  |     |          |          |          |          |  |
| 8 B                                                                                                                                     | 2.964823                                                                                                                                                                                                                                                                                                                                                                                                                                                                                                                                                                                                                                                                                                                                                                                                                                                                                                                                                                                                                                                                                                                                                                                                                                                                                                                                                                                                                                                                                              | 1.703739 | 1.680895 | 2.901342 | 1.975501 |   |   |      |          |  |  |  |  |     |          |          |  |  |  |     |          |          |          |  |  |     |          |          |          |          |  |      |          |          |          |          |          |     |          |          |          |          |          |     |          |          |          |          |          |      |          |          |          |          |          |     |          |          |          |          |          |  |   |   |   |   |  |     |          |  |  |  |  |     |          |          |  |  |  |      |          |          |          |  |  |     |          |          |          |          |  |
| 9 N                                                                                                                                     | 1.581038                                                                                                                                                                                                                                                                                                                                                                                                                                                                                                                                                                                                                                                                                                                                                                                                                                                                                                                                                                                                                                                                                                                                                                                                                                                                                                                                                                                                                                                                                              | 1.581102 | 1.592346 | 1.592266 | 2.905443 |   |   |      |          |  |  |  |  |     |          |          |  |  |  |     |          |          |          |  |  |     |          |          |          |          |  |      |          |          |          |          |          |     |          |          |          |          |          |     |          |          |          |          |          |      |          |          |          |          |          |     |          |          |          |          |          |  |   |   |   |   |  |     |          |  |  |  |  |     |          |          |  |  |  |      |          |          |          |  |  |     |          |          |          |          |  |
|                                                                                                                                         | 6                                                                                                                                                                                                                                                                                                                                                                                                                                                                                                                                                                                                                                                                                                                                                                                                                                                                                                                                                                                                                                                                                                                                                                                                                                                                                                                                                                                                                                                                                                     | 7        | 8        | 9        |          |   |   |      |          |  |  |  |  |     |          |          |  |  |  |     |          |          |          |  |  |     |          |          |          |          |  |      |          |          |          |          |          |     |          |          |          |          |          |     |          |          |          |          |          |      |          |          |          |          |          |     |          |          |          |          |          |  |   |   |   |   |  |     |          |  |  |  |  |     |          |          |  |  |  |      |          |          |          |  |  |     |          |          |          |          |  |
| 6 B                                                                                                                                     | 0.000000                                                                                                                                                                                                                                                                                                                                                                                                                                                                                                                                                                                                                                                                                                                                                                                                                                                                                                                                                                                                                                                                                                                                                                                                                                                                                                                                                                                                                                                                                              |          |          |          |          |   |   |      |          |  |  |  |  |     |          |          |  |  |  |     |          |          |          |  |  |     |          |          |          |          |  |      |          |          |          |          |          |     |          |          |          |          |          |     |          |          |          |          |          |      |          |          |          |          |          |     |          |          |          |          |          |  |   |   |   |   |  |     |          |  |  |  |  |     |          |          |  |  |  |      |          |          |          |  |  |     |          |          |          |          |  |
| 7 B                                                                                                                                     | 1.717794                                                                                                                                                                                                                                                                                                                                                                                                                                                                                                                                                                                                                                                                                                                                                                                                                                                                                                                                                                                                                                                                                                                                                                                                                                                                                                                                                                                                                                                                                              | 0.000000 |          |          |          |   |   |      |          |  |  |  |  |     |          |          |  |  |  |     |          |          |          |  |  |     |          |          |          |          |  |      |          |          |          |          |          |     |          |          |          |          |          |     |          |          |          |          |          |      |          |          |          |          |          |     |          |          |          |          |          |  |   |   |   |   |  |     |          |  |  |  |  |     |          |          |  |  |  |      |          |          |          |  |  |     |          |          |          |          |  |
| 8 B                                                                                                                                     | 2.915400                                                                                                                                                                                                                                                                                                                                                                                                                                                                                                                                                                                                                                                                                                                                                                                                                                                                                                                                                                                                                                                                                                                                                                                                                                                                                                                                                                                                                                                                                              | 1.717747 | 0.000000 |          |          |   |   |      |          |  |  |  |  |     |          |          |  |  |  |     |          |          |          |  |  |     |          |          |          |          |  |      |          |          |          |          |          |     |          |          |          |          |          |     |          |          |          |          |          |      |          |          |          |          |          |     |          |          |          |          |          |  |   |   |   |   |  |     |          |  |  |  |  |     |          |          |  |  |  |      |          |          |          |  |  |     |          |          |          |          |  |
| 9 N                                                                                                                                     | 2.643145                                                                                                                                                                                                                                                                                                                                                                                                                                                                                                                                                                                                                                                                                                                                                                                                                                                                                                                                                                                                                                                                                                                                                                                                                                                                                                                                                                                                                                                                                              | 2.623408 | 2.643204 | 0.000000 |          |   |   |      |          |  |  |  |  |     |          |          |  |  |  |     |          |          |          |  |  |     |          |          |          |          |  |      |          |          |          |          |          |     |          |          |          |          |          |     |          |          |          |          |          |      |          |          |          |          |          |     |          |          |          |          |          |  |   |   |   |   |  |     |          |  |  |  |  |     |          |          |  |  |  |      |          |          |          |  |  |     |          |          |          |          |  |
|  <p>2. -1809.772039 +3.8 H/L 2.08 C<sub>1</sub></p>   | <table border="1"> <thead> <tr> <th></th> <th>1</th> <th>2</th> <th>3</th> <th>4</th> <th>5</th> </tr> </thead> <tbody> <tr><td>1 Co</td><td>0.000000</td><td></td><td></td><td></td><td></td></tr> <tr><td>2 B</td><td>3.090197</td><td>0.000000</td><td></td><td></td><td></td></tr> <tr><td>3 N</td><td>1.915342</td><td>1.610626</td><td>0.000000</td><td></td><td></td></tr> <tr><td>4 B</td><td>2.223328</td><td>1.816863</td><td>1.569376</td><td>0.000000</td><td></td></tr> <tr><td>5 B</td><td>3.268454</td><td>1.657586</td><td>2.625250</td><td>1.685147</td><td>0.000000</td></tr> <tr><td>6 B</td><td>2.195187</td><td>2.613207</td><td>2.683913</td><td>1.905213</td><td>1.686947</td></tr> <tr><td>7 B</td><td>2.983407</td><td>1.857106</td><td>2.623512</td><td>2.606960</td><td>1.732621</td></tr> <tr><td>8 B</td><td>1.956952</td><td>2.941918</td><td>2.709988</td><td>2.928989</td><td>2.868832</td></tr> <tr><td>9 B</td><td>2.102358</td><td>1.946531</td><td>1.541249</td><td>2.601528</td><td>2.883249</td></tr> <tr> <th></th> <th>6</th> <th>7</th> <th>8</th> <th>9</th> <th></th> </tr> <tr><td>6 B</td><td>0.000000</td><td></td><td></td><td></td><td></td></tr> <tr><td>7 B</td><td>1.806516</td><td>0.000000</td><td></td><td></td><td></td></tr> <tr><td>8 B</td><td>1.735071</td><td>1.696629</td><td>0.000000</td><td></td><td></td></tr> </tbody> </table>                                                                                                     |          | 1        | 2        | 3        | 4 | 5 | 1 Co | 0.000000 |  |  |  |  | 2 B | 3.090197 | 0.000000 |  |  |  | 3 N | 1.915342 | 1.610626 | 0.000000 |  |  | 4 B | 2.223328 | 1.816863 | 1.569376 | 0.000000 |  | 5 B  | 3.268454 | 1.657586 | 2.625250 | 1.685147 | 0.000000 | 6 B | 2.195187 | 2.613207 | 2.683913 | 1.905213 | 1.686947 | 7 B | 2.983407 | 1.857106 | 2.623512 | 2.606960 | 1.732621 | 8 B  | 1.956952 | 2.941918 | 2.709988 | 2.928989 | 2.868832 | 9 B | 2.102358 | 1.946531 | 1.541249 | 2.601528 | 2.883249 |  | 6 | 7 | 8 | 9 |  | 6 B | 0.000000 |  |  |  |  | 7 B | 1.806516 | 0.000000 |  |  |  | 8 B  | 1.735071 | 1.696629 | 0.000000 |  |  |     |          |          |          |          |  |
|                                                                                                                                         | 1                                                                                                                                                                                                                                                                                                                                                                                                                                                                                                                                                                                                                                                                                                                                                                                                                                                                                                                                                                                                                                                                                                                                                                                                                                                                                                                                                                                                                                                                                                     | 2        | 3        | 4        | 5        |   |   |      |          |  |  |  |  |     |          |          |  |  |  |     |          |          |          |  |  |     |          |          |          |          |  |      |          |          |          |          |          |     |          |          |          |          |          |     |          |          |          |          |          |      |          |          |          |          |          |     |          |          |          |          |          |  |   |   |   |   |  |     |          |  |  |  |  |     |          |          |  |  |  |      |          |          |          |  |  |     |          |          |          |          |  |
| 1 Co                                                                                                                                    | 0.000000                                                                                                                                                                                                                                                                                                                                                                                                                                                                                                                                                                                                                                                                                                                                                                                                                                                                                                                                                                                                                                                                                                                                                                                                                                                                                                                                                                                                                                                                                              |          |          |          |          |   |   |      |          |  |  |  |  |     |          |          |  |  |  |     |          |          |          |  |  |     |          |          |          |          |  |      |          |          |          |          |          |     |          |          |          |          |          |     |          |          |          |          |          |      |          |          |          |          |          |     |          |          |          |          |          |  |   |   |   |   |  |     |          |  |  |  |  |     |          |          |  |  |  |      |          |          |          |  |  |     |          |          |          |          |  |
| 2 B                                                                                                                                     | 3.090197                                                                                                                                                                                                                                                                                                                                                                                                                                                                                                                                                                                                                                                                                                                                                                                                                                                                                                                                                                                                                                                                                                                                                                                                                                                                                                                                                                                                                                                                                              | 0.000000 |          |          |          |   |   |      |          |  |  |  |  |     |          |          |  |  |  |     |          |          |          |  |  |     |          |          |          |          |  |      |          |          |          |          |          |     |          |          |          |          |          |     |          |          |          |          |          |      |          |          |          |          |          |     |          |          |          |          |          |  |   |   |   |   |  |     |          |  |  |  |  |     |          |          |  |  |  |      |          |          |          |  |  |     |          |          |          |          |  |
| 3 N                                                                                                                                     | 1.915342                                                                                                                                                                                                                                                                                                                                                                                                                                                                                                                                                                                                                                                                                                                                                                                                                                                                                                                                                                                                                                                                                                                                                                                                                                                                                                                                                                                                                                                                                              | 1.610626 | 0.000000 |          |          |   |   |      |          |  |  |  |  |     |          |          |  |  |  |     |          |          |          |  |  |     |          |          |          |          |  |      |          |          |          |          |          |     |          |          |          |          |          |     |          |          |          |          |          |      |          |          |          |          |          |     |          |          |          |          |          |  |   |   |   |   |  |     |          |  |  |  |  |     |          |          |  |  |  |      |          |          |          |  |  |     |          |          |          |          |  |
| 4 B                                                                                                                                     | 2.223328                                                                                                                                                                                                                                                                                                                                                                                                                                                                                                                                                                                                                                                                                                                                                                                                                                                                                                                                                                                                                                                                                                                                                                                                                                                                                                                                                                                                                                                                                              | 1.816863 | 1.569376 | 0.000000 |          |   |   |      |          |  |  |  |  |     |          |          |  |  |  |     |          |          |          |  |  |     |          |          |          |          |  |      |          |          |          |          |          |     |          |          |          |          |          |     |          |          |          |          |          |      |          |          |          |          |          |     |          |          |          |          |          |  |   |   |   |   |  |     |          |  |  |  |  |     |          |          |  |  |  |      |          |          |          |  |  |     |          |          |          |          |  |
| 5 B                                                                                                                                     | 3.268454                                                                                                                                                                                                                                                                                                                                                                                                                                                                                                                                                                                                                                                                                                                                                                                                                                                                                                                                                                                                                                                                                                                                                                                                                                                                                                                                                                                                                                                                                              | 1.657586 | 2.625250 | 1.685147 | 0.000000 |   |   |      |          |  |  |  |  |     |          |          |  |  |  |     |          |          |          |  |  |     |          |          |          |          |  |      |          |          |          |          |          |     |          |          |          |          |          |     |          |          |          |          |          |      |          |          |          |          |          |     |          |          |          |          |          |  |   |   |   |   |  |     |          |  |  |  |  |     |          |          |  |  |  |      |          |          |          |  |  |     |          |          |          |          |  |
| 6 B                                                                                                                                     | 2.195187                                                                                                                                                                                                                                                                                                                                                                                                                                                                                                                                                                                                                                                                                                                                                                                                                                                                                                                                                                                                                                                                                                                                                                                                                                                                                                                                                                                                                                                                                              | 2.613207 | 2.683913 | 1.905213 | 1.686947 |   |   |      |          |  |  |  |  |     |          |          |  |  |  |     |          |          |          |  |  |     |          |          |          |          |  |      |          |          |          |          |          |     |          |          |          |          |          |     |          |          |          |          |          |      |          |          |          |          |          |     |          |          |          |          |          |  |   |   |   |   |  |     |          |  |  |  |  |     |          |          |  |  |  |      |          |          |          |  |  |     |          |          |          |          |  |
| 7 B                                                                                                                                     | 2.983407                                                                                                                                                                                                                                                                                                                                                                                                                                                                                                                                                                                                                                                                                                                                                                                                                                                                                                                                                                                                                                                                                                                                                                                                                                                                                                                                                                                                                                                                                              | 1.857106 | 2.623512 | 2.606960 | 1.732621 |   |   |      |          |  |  |  |  |     |          |          |  |  |  |     |          |          |          |  |  |     |          |          |          |          |  |      |          |          |          |          |          |     |          |          |          |          |          |     |          |          |          |          |          |      |          |          |          |          |          |     |          |          |          |          |          |  |   |   |   |   |  |     |          |  |  |  |  |     |          |          |  |  |  |      |          |          |          |  |  |     |          |          |          |          |  |
| 8 B                                                                                                                                     | 1.956952                                                                                                                                                                                                                                                                                                                                                                                                                                                                                                                                                                                                                                                                                                                                                                                                                                                                                                                                                                                                                                                                                                                                                                                                                                                                                                                                                                                                                                                                                              | 2.941918 | 2.709988 | 2.928989 | 2.868832 |   |   |      |          |  |  |  |  |     |          |          |  |  |  |     |          |          |          |  |  |     |          |          |          |          |  |      |          |          |          |          |          |     |          |          |          |          |          |     |          |          |          |          |          |      |          |          |          |          |          |     |          |          |          |          |          |  |   |   |   |   |  |     |          |  |  |  |  |     |          |          |  |  |  |      |          |          |          |  |  |     |          |          |          |          |  |
| 9 B                                                                                                                                     | 2.102358                                                                                                                                                                                                                                                                                                                                                                                                                                                                                                                                                                                                                                                                                                                                                                                                                                                                                                                                                                                                                                                                                                                                                                                                                                                                                                                                                                                                                                                                                              | 1.946531 | 1.541249 | 2.601528 | 2.883249 |   |   |      |          |  |  |  |  |     |          |          |  |  |  |     |          |          |          |  |  |     |          |          |          |          |  |      |          |          |          |          |          |     |          |          |          |          |          |     |          |          |          |          |          |      |          |          |          |          |          |     |          |          |          |          |          |  |   |   |   |   |  |     |          |  |  |  |  |     |          |          |  |  |  |      |          |          |          |  |  |     |          |          |          |          |  |
|                                                                                                                                         | 6                                                                                                                                                                                                                                                                                                                                                                                                                                                                                                                                                                                                                                                                                                                                                                                                                                                                                                                                                                                                                                                                                                                                                                                                                                                                                                                                                                                                                                                                                                     | 7        | 8        | 9        |          |   |   |      |          |  |  |  |  |     |          |          |  |  |  |     |          |          |          |  |  |     |          |          |          |          |  |      |          |          |          |          |          |     |          |          |          |          |          |     |          |          |          |          |          |      |          |          |          |          |          |     |          |          |          |          |          |  |   |   |   |   |  |     |          |  |  |  |  |     |          |          |  |  |  |      |          |          |          |  |  |     |          |          |          |          |  |
| 6 B                                                                                                                                     | 0.000000                                                                                                                                                                                                                                                                                                                                                                                                                                                                                                                                                                                                                                                                                                                                                                                                                                                                                                                                                                                                                                                                                                                                                                                                                                                                                                                                                                                                                                                                                              |          |          |          |          |   |   |      |          |  |  |  |  |     |          |          |  |  |  |     |          |          |          |  |  |     |          |          |          |          |  |      |          |          |          |          |          |     |          |          |          |          |          |     |          |          |          |          |          |      |          |          |          |          |          |     |          |          |          |          |          |  |   |   |   |   |  |     |          |  |  |  |  |     |          |          |  |  |  |      |          |          |          |  |  |     |          |          |          |          |  |
| 7 B                                                                                                                                     | 1.806516                                                                                                                                                                                                                                                                                                                                                                                                                                                                                                                                                                                                                                                                                                                                                                                                                                                                                                                                                                                                                                                                                                                                                                                                                                                                                                                                                                                                                                                                                              | 0.000000 |          |          |          |   |   |      |          |  |  |  |  |     |          |          |  |  |  |     |          |          |          |  |  |     |          |          |          |          |  |      |          |          |          |          |          |     |          |          |          |          |          |     |          |          |          |          |          |      |          |          |          |          |          |     |          |          |          |          |          |  |   |   |   |   |  |     |          |  |  |  |  |     |          |          |  |  |  |      |          |          |          |  |  |     |          |          |          |          |  |
| 8 B                                                                                                                                     | 1.735071                                                                                                                                                                                                                                                                                                                                                                                                                                                                                                                                                                                                                                                                                                                                                                                                                                                                                                                                                                                                                                                                                                                                                                                                                                                                                                                                                                                                                                                                                              | 1.696629 | 0.000000 |          |          |   |   |      |          |  |  |  |  |     |          |          |  |  |  |     |          |          |          |  |  |     |          |          |          |          |  |      |          |          |          |          |          |     |          |          |          |          |          |     |          |          |          |          |          |      |          |          |          |          |          |     |          |          |          |          |          |  |   |   |   |   |  |     |          |  |  |  |  |     |          |          |  |  |  |      |          |          |          |  |  |     |          |          |          |          |  |
|  <p>3. -1809.757360 +13.0 H/L 1.53 C<sub>s</sub></p> | <table border="1"> <thead> <tr> <th></th> <th>1</th> <th>2</th> <th>3</th> <th>4</th> <th>5</th> </tr> </thead> <tbody> <tr><td>1 B</td><td>0.000000</td><td></td><td></td><td></td><td></td></tr> <tr><td>2 N</td><td>2.621913</td><td>0.000000</td><td></td><td></td><td></td></tr> <tr><td>3 B</td><td>1.850991</td><td>1.596412</td><td>0.000000</td><td></td><td></td></tr> <tr><td>4 B</td><td>1.891485</td><td>1.572480</td><td>1.927990</td><td>0.000000</td><td></td></tr> <tr><td>5 B</td><td>2.615201</td><td>1.572874</td><td>2.664905</td><td>1.804401</td><td>0.000000</td></tr> <tr><td>6 B</td><td>1.700167</td><td>2.628547</td><td>2.879191</td><td>1.701756</td><td>1.700069</td></tr> <tr><td>7 B</td><td>1.806801</td><td>2.622583</td><td>2.609772</td><td>2.616178</td><td>1.893559</td></tr> <tr><td>8 Co</td><td>2.032684</td><td>2.983697</td><td>1.962978</td><td>3.308281</td><td>3.308858</td></tr> <tr><td>9 B</td><td>2.611853</td><td>1.596518</td><td>1.874101</td><td>2.665773</td><td>1.930718</td></tr> <tr> <th></th> <th>6</th> <th>7</th> <th>8</th> <th>9</th> <th></th> </tr> <tr><td>6 B</td><td>0.000000</td><td></td><td></td><td></td><td></td></tr> <tr><td>7 B</td><td>1.700512</td><td>0.000000</td><td></td><td></td><td></td></tr> <tr><td>8 Co</td><td>3.239817</td><td>2.030823</td><td>0.000000</td><td></td><td></td></tr> <tr><td>9 B</td><td>2.880772</td><td>1.853178</td><td>1.963368</td><td>0.000000</td><td></td></tr> </tbody> </table> |          | 1        | 2        | 3        | 4 | 5 | 1 B  | 0.000000 |  |  |  |  | 2 N | 2.621913 | 0.000000 |  |  |  | 3 B | 1.850991 | 1.596412 | 0.000000 |  |  | 4 B | 1.891485 | 1.572480 | 1.927990 | 0.000000 |  | 5 B  | 2.615201 | 1.572874 | 2.664905 | 1.804401 | 0.000000 | 6 B | 1.700167 | 2.628547 | 2.879191 | 1.701756 | 1.700069 | 7 B | 1.806801 | 2.622583 | 2.609772 | 2.616178 | 1.893559 | 8 Co | 2.032684 | 2.983697 | 1.962978 | 3.308281 | 3.308858 | 9 B | 2.611853 | 1.596518 | 1.874101 | 2.665773 | 1.930718 |  | 6 | 7 | 8 | 9 |  | 6 B | 0.000000 |  |  |  |  | 7 B | 1.700512 | 0.000000 |  |  |  | 8 Co | 3.239817 | 2.030823 | 0.000000 |  |  | 9 B | 2.880772 | 1.853178 | 1.963368 | 0.000000 |  |
|                                                                                                                                         | 1                                                                                                                                                                                                                                                                                                                                                                                                                                                                                                                                                                                                                                                                                                                                                                                                                                                                                                                                                                                                                                                                                                                                                                                                                                                                                                                                                                                                                                                                                                     | 2        | 3        | 4        | 5        |   |   |      |          |  |  |  |  |     |          |          |  |  |  |     |          |          |          |  |  |     |          |          |          |          |  |      |          |          |          |          |          |     |          |          |          |          |          |     |          |          |          |          |          |      |          |          |          |          |          |     |          |          |          |          |          |  |   |   |   |   |  |     |          |  |  |  |  |     |          |          |  |  |  |      |          |          |          |  |  |     |          |          |          |          |  |
| 1 B                                                                                                                                     | 0.000000                                                                                                                                                                                                                                                                                                                                                                                                                                                                                                                                                                                                                                                                                                                                                                                                                                                                                                                                                                                                                                                                                                                                                                                                                                                                                                                                                                                                                                                                                              |          |          |          |          |   |   |      |          |  |  |  |  |     |          |          |  |  |  |     |          |          |          |  |  |     |          |          |          |          |  |      |          |          |          |          |          |     |          |          |          |          |          |     |          |          |          |          |          |      |          |          |          |          |          |     |          |          |          |          |          |  |   |   |   |   |  |     |          |  |  |  |  |     |          |          |  |  |  |      |          |          |          |  |  |     |          |          |          |          |  |
| 2 N                                                                                                                                     | 2.621913                                                                                                                                                                                                                                                                                                                                                                                                                                                                                                                                                                                                                                                                                                                                                                                                                                                                                                                                                                                                                                                                                                                                                                                                                                                                                                                                                                                                                                                                                              | 0.000000 |          |          |          |   |   |      |          |  |  |  |  |     |          |          |  |  |  |     |          |          |          |  |  |     |          |          |          |          |  |      |          |          |          |          |          |     |          |          |          |          |          |     |          |          |          |          |          |      |          |          |          |          |          |     |          |          |          |          |          |  |   |   |   |   |  |     |          |  |  |  |  |     |          |          |  |  |  |      |          |          |          |  |  |     |          |          |          |          |  |
| 3 B                                                                                                                                     | 1.850991                                                                                                                                                                                                                                                                                                                                                                                                                                                                                                                                                                                                                                                                                                                                                                                                                                                                                                                                                                                                                                                                                                                                                                                                                                                                                                                                                                                                                                                                                              | 1.596412 | 0.000000 |          |          |   |   |      |          |  |  |  |  |     |          |          |  |  |  |     |          |          |          |  |  |     |          |          |          |          |  |      |          |          |          |          |          |     |          |          |          |          |          |     |          |          |          |          |          |      |          |          |          |          |          |     |          |          |          |          |          |  |   |   |   |   |  |     |          |  |  |  |  |     |          |          |  |  |  |      |          |          |          |  |  |     |          |          |          |          |  |
| 4 B                                                                                                                                     | 1.891485                                                                                                                                                                                                                                                                                                                                                                                                                                                                                                                                                                                                                                                                                                                                                                                                                                                                                                                                                                                                                                                                                                                                                                                                                                                                                                                                                                                                                                                                                              | 1.572480 | 1.927990 | 0.000000 |          |   |   |      |          |  |  |  |  |     |          |          |  |  |  |     |          |          |          |  |  |     |          |          |          |          |  |      |          |          |          |          |          |     |          |          |          |          |          |     |          |          |          |          |          |      |          |          |          |          |          |     |          |          |          |          |          |  |   |   |   |   |  |     |          |  |  |  |  |     |          |          |  |  |  |      |          |          |          |  |  |     |          |          |          |          |  |
| 5 B                                                                                                                                     | 2.615201                                                                                                                                                                                                                                                                                                                                                                                                                                                                                                                                                                                                                                                                                                                                                                                                                                                                                                                                                                                                                                                                                                                                                                                                                                                                                                                                                                                                                                                                                              | 1.572874 | 2.664905 | 1.804401 | 0.000000 |   |   |      |          |  |  |  |  |     |          |          |  |  |  |     |          |          |          |  |  |     |          |          |          |          |  |      |          |          |          |          |          |     |          |          |          |          |          |     |          |          |          |          |          |      |          |          |          |          |          |     |          |          |          |          |          |  |   |   |   |   |  |     |          |  |  |  |  |     |          |          |  |  |  |      |          |          |          |  |  |     |          |          |          |          |  |
| 6 B                                                                                                                                     | 1.700167                                                                                                                                                                                                                                                                                                                                                                                                                                                                                                                                                                                                                                                                                                                                                                                                                                                                                                                                                                                                                                                                                                                                                                                                                                                                                                                                                                                                                                                                                              | 2.628547 | 2.879191 | 1.701756 | 1.700069 |   |   |      |          |  |  |  |  |     |          |          |  |  |  |     |          |          |          |  |  |     |          |          |          |          |  |      |          |          |          |          |          |     |          |          |          |          |          |     |          |          |          |          |          |      |          |          |          |          |          |     |          |          |          |          |          |  |   |   |   |   |  |     |          |  |  |  |  |     |          |          |  |  |  |      |          |          |          |  |  |     |          |          |          |          |  |
| 7 B                                                                                                                                     | 1.806801                                                                                                                                                                                                                                                                                                                                                                                                                                                                                                                                                                                                                                                                                                                                                                                                                                                                                                                                                                                                                                                                                                                                                                                                                                                                                                                                                                                                                                                                                              | 2.622583 | 2.609772 | 2.616178 | 1.893559 |   |   |      |          |  |  |  |  |     |          |          |  |  |  |     |          |          |          |  |  |     |          |          |          |          |  |      |          |          |          |          |          |     |          |          |          |          |          |     |          |          |          |          |          |      |          |          |          |          |          |     |          |          |          |          |          |  |   |   |   |   |  |     |          |  |  |  |  |     |          |          |  |  |  |      |          |          |          |  |  |     |          |          |          |          |  |
| 8 Co                                                                                                                                    | 2.032684                                                                                                                                                                                                                                                                                                                                                                                                                                                                                                                                                                                                                                                                                                                                                                                                                                                                                                                                                                                                                                                                                                                                                                                                                                                                                                                                                                                                                                                                                              | 2.983697 | 1.962978 | 3.308281 | 3.308858 |   |   |      |          |  |  |  |  |     |          |          |  |  |  |     |          |          |          |  |  |     |          |          |          |          |  |      |          |          |          |          |          |     |          |          |          |          |          |     |          |          |          |          |          |      |          |          |          |          |          |     |          |          |          |          |          |  |   |   |   |   |  |     |          |  |  |  |  |     |          |          |  |  |  |      |          |          |          |  |  |     |          |          |          |          |  |
| 9 B                                                                                                                                     | 2.611853                                                                                                                                                                                                                                                                                                                                                                                                                                                                                                                                                                                                                                                                                                                                                                                                                                                                                                                                                                                                                                                                                                                                                                                                                                                                                                                                                                                                                                                                                              | 1.596518 | 1.874101 | 2.665773 | 1.930718 |   |   |      |          |  |  |  |  |     |          |          |  |  |  |     |          |          |          |  |  |     |          |          |          |          |  |      |          |          |          |          |          |     |          |          |          |          |          |     |          |          |          |          |          |      |          |          |          |          |          |     |          |          |          |          |          |  |   |   |   |   |  |     |          |  |  |  |  |     |          |          |  |  |  |      |          |          |          |  |  |     |          |          |          |          |  |
|                                                                                                                                         | 6                                                                                                                                                                                                                                                                                                                                                                                                                                                                                                                                                                                                                                                                                                                                                                                                                                                                                                                                                                                                                                                                                                                                                                                                                                                                                                                                                                                                                                                                                                     | 7        | 8        | 9        |          |   |   |      |          |  |  |  |  |     |          |          |  |  |  |     |          |          |          |  |  |     |          |          |          |          |  |      |          |          |          |          |          |     |          |          |          |          |          |     |          |          |          |          |          |      |          |          |          |          |          |     |          |          |          |          |          |  |   |   |   |   |  |     |          |  |  |  |  |     |          |          |  |  |  |      |          |          |          |  |  |     |          |          |          |          |  |
| 6 B                                                                                                                                     | 0.000000                                                                                                                                                                                                                                                                                                                                                                                                                                                                                                                                                                                                                                                                                                                                                                                                                                                                                                                                                                                                                                                                                                                                                                                                                                                                                                                                                                                                                                                                                              |          |          |          |          |   |   |      |          |  |  |  |  |     |          |          |  |  |  |     |          |          |          |  |  |     |          |          |          |          |  |      |          |          |          |          |          |     |          |          |          |          |          |     |          |          |          |          |          |      |          |          |          |          |          |     |          |          |          |          |          |  |   |   |   |   |  |     |          |  |  |  |  |     |          |          |  |  |  |      |          |          |          |  |  |     |          |          |          |          |  |
| 7 B                                                                                                                                     | 1.700512                                                                                                                                                                                                                                                                                                                                                                                                                                                                                                                                                                                                                                                                                                                                                                                                                                                                                                                                                                                                                                                                                                                                                                                                                                                                                                                                                                                                                                                                                              | 0.000000 |          |          |          |   |   |      |          |  |  |  |  |     |          |          |  |  |  |     |          |          |          |  |  |     |          |          |          |          |  |      |          |          |          |          |          |     |          |          |          |          |          |     |          |          |          |          |          |      |          |          |          |          |          |     |          |          |          |          |          |  |   |   |   |   |  |     |          |  |  |  |  |     |          |          |  |  |  |      |          |          |          |  |  |     |          |          |          |          |  |
| 8 Co                                                                                                                                    | 3.239817                                                                                                                                                                                                                                                                                                                                                                                                                                                                                                                                                                                                                                                                                                                                                                                                                                                                                                                                                                                                                                                                                                                                                                                                                                                                                                                                                                                                                                                                                              | 2.030823 | 0.000000 |          |          |   |   |      |          |  |  |  |  |     |          |          |  |  |  |     |          |          |          |  |  |     |          |          |          |          |  |      |          |          |          |          |          |     |          |          |          |          |          |     |          |          |          |          |          |      |          |          |          |          |          |     |          |          |          |          |          |  |   |   |   |   |  |     |          |  |  |  |  |     |          |          |  |  |  |      |          |          |          |  |  |     |          |          |          |          |  |
| 9 B                                                                                                                                     | 2.880772                                                                                                                                                                                                                                                                                                                                                                                                                                                                                                                                                                                                                                                                                                                                                                                                                                                                                                                                                                                                                                                                                                                                                                                                                                                                                                                                                                                                                                                                                              | 1.853178 | 1.963368 | 0.000000 |          |   |   |      |          |  |  |  |  |     |          |          |  |  |  |     |          |          |          |  |  |     |          |          |          |          |  |      |          |          |          |          |          |     |          |          |          |          |          |     |          |          |          |          |          |      |          |          |          |          |          |     |          |          |          |          |          |  |   |   |   |   |  |     |          |  |  |  |  |     |          |          |  |  |  |      |          |          |          |  |  |     |          |          |          |          |  |

|                                               | <table border="1"> <thead> <tr> <th></th> <th>1</th> <th>2</th> <th>3</th> <th>4</th> <th>5</th> </tr> </thead> <tbody> <tr><td>1 B</td><td>0.000000</td><td></td><td></td><td></td><td></td></tr> <tr><td>2 B</td><td>1.781515</td><td>0.000000</td><td></td><td></td><td></td></tr> <tr><td>3 Co</td><td>2.747112</td><td>3.002764</td><td>0.000000</td><td></td><td></td></tr> <tr><td>4 B</td><td>2.906660</td><td>1.865125</td><td>2.081421</td><td>0.000000</td><td></td></tr> <tr><td>5 N</td><td>2.775992</td><td>1.535288</td><td>2.681913</td><td>1.486543</td><td>0.000000</td></tr> <tr><td>6 B</td><td>1.823631</td><td>1.766553</td><td>2.146774</td><td>1.737855</td><td>2.568040</td></tr> <tr><td>7 B</td><td>1.699261</td><td>2.914748</td><td>2.025089</td><td>3.041290</td><td>3.564170</td></tr> <tr><td>8 B</td><td>1.941522</td><td>1.907916</td><td>2.214923</td><td>2.341844</td><td>1.532268</td></tr> <tr><td>9 B</td><td>1.760372</td><td>2.947625</td><td>1.950266</td><td>3.235553</td><td>3.087200</td></tr> <tr> <th></th> <th>6</th> <th>7</th> <th>8</th> <th>9</th> <th></th> </tr> <tr><td>6 B</td><td>0.000000</td><td></td><td></td><td></td><td></td></tr> <tr><td>7 B</td><td>1.692544</td><td>0.000000</td><td></td><td></td><td></td></tr> <tr><td>8 B</td><td>2.569487</td><td>2.767503</td><td>0.000000</td><td></td><td></td></tr> <tr><td>9 B</td><td>2.648249</td><td>1.720306</td><td>1.724936</td><td>0.000000</td><td></td></tr> </tbody> </table> |          | 1        | 2        | 3        | 4 | 5 | 1 B  | 0.000000 |  |  |  |  | 2 B | 1.781515 | 0.000000 |  |  |  | 3 Co | 2.747112 | 3.002764 | 0.000000 |  |  | 4 B | 2.906660 | 1.865125 | 2.081421 | 0.000000 |  | 5 N  | 2.775992 | 1.535288 | 2.681913 | 1.486543 | 0.000000 | 6 B | 1.823631 | 1.766553 | 2.146774 | 1.737855 | 2.568040 | 7 B | 1.699261 | 2.914748 | 2.025089 | 3.041290 | 3.564170 | 8 B | 1.941522 | 1.907916 | 2.214923 | 2.341844 | 1.532268 | 9 B | 1.760372 | 2.947625 | 1.950266 | 3.235553 | 3.087200 |  | 6 | 7 | 8 | 9 |  | 6 B | 0.000000 |  |  |  |  | 7 B | 1.692544 | 0.000000 |  |  |  | 8 B | 2.569487 | 2.767503 | 0.000000 |  |  | 9 B | 2.648249 | 1.720306 | 1.724936 | 0.000000 |  |
|-----------------------------------------------|------------------------------------------------------------------------------------------------------------------------------------------------------------------------------------------------------------------------------------------------------------------------------------------------------------------------------------------------------------------------------------------------------------------------------------------------------------------------------------------------------------------------------------------------------------------------------------------------------------------------------------------------------------------------------------------------------------------------------------------------------------------------------------------------------------------------------------------------------------------------------------------------------------------------------------------------------------------------------------------------------------------------------------------------------------------------------------------------------------------------------------------------------------------------------------------------------------------------------------------------------------------------------------------------------------------------------------------------------------------------------------------------------------------------------------------------------------------------------------------------------|----------|----------|----------|----------|---|---|------|----------|--|--|--|--|-----|----------|----------|--|--|--|------|----------|----------|----------|--|--|-----|----------|----------|----------|----------|--|------|----------|----------|----------|----------|----------|-----|----------|----------|----------|----------|----------|-----|----------|----------|----------|----------|----------|-----|----------|----------|----------|----------|----------|-----|----------|----------|----------|----------|----------|--|---|---|---|---|--|-----|----------|--|--|--|--|-----|----------|----------|--|--|--|-----|----------|----------|----------|--|--|-----|----------|----------|----------|----------|--|
|                                               | 1                                                                                                                                                                                                                                                                                                                                                                                                                                                                                                                                                                                                                                                                                                                                                                                                                                                                                                                                                                                                                                                                                                                                                                                                                                                                                                                                                                                                                                                                                                    | 2        | 3        | 4        | 5        |   |   |      |          |  |  |  |  |     |          |          |  |  |  |      |          |          |          |  |  |     |          |          |          |          |  |      |          |          |          |          |          |     |          |          |          |          |          |     |          |          |          |          |          |     |          |          |          |          |          |     |          |          |          |          |          |  |   |   |   |   |  |     |          |  |  |  |  |     |          |          |  |  |  |     |          |          |          |  |  |     |          |          |          |          |  |
| 1 B                                           | 0.000000                                                                                                                                                                                                                                                                                                                                                                                                                                                                                                                                                                                                                                                                                                                                                                                                                                                                                                                                                                                                                                                                                                                                                                                                                                                                                                                                                                                                                                                                                             |          |          |          |          |   |   |      |          |  |  |  |  |     |          |          |  |  |  |      |          |          |          |  |  |     |          |          |          |          |  |      |          |          |          |          |          |     |          |          |          |          |          |     |          |          |          |          |          |     |          |          |          |          |          |     |          |          |          |          |          |  |   |   |   |   |  |     |          |  |  |  |  |     |          |          |  |  |  |     |          |          |          |  |  |     |          |          |          |          |  |
| 2 B                                           | 1.781515                                                                                                                                                                                                                                                                                                                                                                                                                                                                                                                                                                                                                                                                                                                                                                                                                                                                                                                                                                                                                                                                                                                                                                                                                                                                                                                                                                                                                                                                                             | 0.000000 |          |          |          |   |   |      |          |  |  |  |  |     |          |          |  |  |  |      |          |          |          |  |  |     |          |          |          |          |  |      |          |          |          |          |          |     |          |          |          |          |          |     |          |          |          |          |          |     |          |          |          |          |          |     |          |          |          |          |          |  |   |   |   |   |  |     |          |  |  |  |  |     |          |          |  |  |  |     |          |          |          |  |  |     |          |          |          |          |  |
| 3 Co                                          | 2.747112                                                                                                                                                                                                                                                                                                                                                                                                                                                                                                                                                                                                                                                                                                                                                                                                                                                                                                                                                                                                                                                                                                                                                                                                                                                                                                                                                                                                                                                                                             | 3.002764 | 0.000000 |          |          |   |   |      |          |  |  |  |  |     |          |          |  |  |  |      |          |          |          |  |  |     |          |          |          |          |  |      |          |          |          |          |          |     |          |          |          |          |          |     |          |          |          |          |          |     |          |          |          |          |          |     |          |          |          |          |          |  |   |   |   |   |  |     |          |  |  |  |  |     |          |          |  |  |  |     |          |          |          |  |  |     |          |          |          |          |  |
| 4 B                                           | 2.906660                                                                                                                                                                                                                                                                                                                                                                                                                                                                                                                                                                                                                                                                                                                                                                                                                                                                                                                                                                                                                                                                                                                                                                                                                                                                                                                                                                                                                                                                                             | 1.865125 | 2.081421 | 0.000000 |          |   |   |      |          |  |  |  |  |     |          |          |  |  |  |      |          |          |          |  |  |     |          |          |          |          |  |      |          |          |          |          |          |     |          |          |          |          |          |     |          |          |          |          |          |     |          |          |          |          |          |     |          |          |          |          |          |  |   |   |   |   |  |     |          |  |  |  |  |     |          |          |  |  |  |     |          |          |          |  |  |     |          |          |          |          |  |
| 5 N                                           | 2.775992                                                                                                                                                                                                                                                                                                                                                                                                                                                                                                                                                                                                                                                                                                                                                                                                                                                                                                                                                                                                                                                                                                                                                                                                                                                                                                                                                                                                                                                                                             | 1.535288 | 2.681913 | 1.486543 | 0.000000 |   |   |      |          |  |  |  |  |     |          |          |  |  |  |      |          |          |          |  |  |     |          |          |          |          |  |      |          |          |          |          |          |     |          |          |          |          |          |     |          |          |          |          |          |     |          |          |          |          |          |     |          |          |          |          |          |  |   |   |   |   |  |     |          |  |  |  |  |     |          |          |  |  |  |     |          |          |          |  |  |     |          |          |          |          |  |
| 6 B                                           | 1.823631                                                                                                                                                                                                                                                                                                                                                                                                                                                                                                                                                                                                                                                                                                                                                                                                                                                                                                                                                                                                                                                                                                                                                                                                                                                                                                                                                                                                                                                                                             | 1.766553 | 2.146774 | 1.737855 | 2.568040 |   |   |      |          |  |  |  |  |     |          |          |  |  |  |      |          |          |          |  |  |     |          |          |          |          |  |      |          |          |          |          |          |     |          |          |          |          |          |     |          |          |          |          |          |     |          |          |          |          |          |     |          |          |          |          |          |  |   |   |   |   |  |     |          |  |  |  |  |     |          |          |  |  |  |     |          |          |          |  |  |     |          |          |          |          |  |
| 7 B                                           | 1.699261                                                                                                                                                                                                                                                                                                                                                                                                                                                                                                                                                                                                                                                                                                                                                                                                                                                                                                                                                                                                                                                                                                                                                                                                                                                                                                                                                                                                                                                                                             | 2.914748 | 2.025089 | 3.041290 | 3.564170 |   |   |      |          |  |  |  |  |     |          |          |  |  |  |      |          |          |          |  |  |     |          |          |          |          |  |      |          |          |          |          |          |     |          |          |          |          |          |     |          |          |          |          |          |     |          |          |          |          |          |     |          |          |          |          |          |  |   |   |   |   |  |     |          |  |  |  |  |     |          |          |  |  |  |     |          |          |          |  |  |     |          |          |          |          |  |
| 8 B                                           | 1.941522                                                                                                                                                                                                                                                                                                                                                                                                                                                                                                                                                                                                                                                                                                                                                                                                                                                                                                                                                                                                                                                                                                                                                                                                                                                                                                                                                                                                                                                                                             | 1.907916 | 2.214923 | 2.341844 | 1.532268 |   |   |      |          |  |  |  |  |     |          |          |  |  |  |      |          |          |          |  |  |     |          |          |          |          |  |      |          |          |          |          |          |     |          |          |          |          |          |     |          |          |          |          |          |     |          |          |          |          |          |     |          |          |          |          |          |  |   |   |   |   |  |     |          |  |  |  |  |     |          |          |  |  |  |     |          |          |          |  |  |     |          |          |          |          |  |
| 9 B                                           | 1.760372                                                                                                                                                                                                                                                                                                                                                                                                                                                                                                                                                                                                                                                                                                                                                                                                                                                                                                                                                                                                                                                                                                                                                                                                                                                                                                                                                                                                                                                                                             | 2.947625 | 1.950266 | 3.235553 | 3.087200 |   |   |      |          |  |  |  |  |     |          |          |  |  |  |      |          |          |          |  |  |     |          |          |          |          |  |      |          |          |          |          |          |     |          |          |          |          |          |     |          |          |          |          |          |     |          |          |          |          |          |     |          |          |          |          |          |  |   |   |   |   |  |     |          |  |  |  |  |     |          |          |  |  |  |     |          |          |          |  |  |     |          |          |          |          |  |
|                                               | 6                                                                                                                                                                                                                                                                                                                                                                                                                                                                                                                                                                                                                                                                                                                                                                                                                                                                                                                                                                                                                                                                                                                                                                                                                                                                                                                                                                                                                                                                                                    | 7        | 8        | 9        |          |   |   |      |          |  |  |  |  |     |          |          |  |  |  |      |          |          |          |  |  |     |          |          |          |          |  |      |          |          |          |          |          |     |          |          |          |          |          |     |          |          |          |          |          |     |          |          |          |          |          |     |          |          |          |          |          |  |   |   |   |   |  |     |          |  |  |  |  |     |          |          |  |  |  |     |          |          |          |  |  |     |          |          |          |          |  |
| 6 B                                           | 0.000000                                                                                                                                                                                                                                                                                                                                                                                                                                                                                                                                                                                                                                                                                                                                                                                                                                                                                                                                                                                                                                                                                                                                                                                                                                                                                                                                                                                                                                                                                             |          |          |          |          |   |   |      |          |  |  |  |  |     |          |          |  |  |  |      |          |          |          |  |  |     |          |          |          |          |  |      |          |          |          |          |          |     |          |          |          |          |          |     |          |          |          |          |          |     |          |          |          |          |          |     |          |          |          |          |          |  |   |   |   |   |  |     |          |  |  |  |  |     |          |          |  |  |  |     |          |          |          |  |  |     |          |          |          |          |  |
| 7 B                                           | 1.692544                                                                                                                                                                                                                                                                                                                                                                                                                                                                                                                                                                                                                                                                                                                                                                                                                                                                                                                                                                                                                                                                                                                                                                                                                                                                                                                                                                                                                                                                                             | 0.000000 |          |          |          |   |   |      |          |  |  |  |  |     |          |          |  |  |  |      |          |          |          |  |  |     |          |          |          |          |  |      |          |          |          |          |          |     |          |          |          |          |          |     |          |          |          |          |          |     |          |          |          |          |          |     |          |          |          |          |          |  |   |   |   |   |  |     |          |  |  |  |  |     |          |          |  |  |  |     |          |          |          |  |  |     |          |          |          |          |  |
| 8 B                                           | 2.569487                                                                                                                                                                                                                                                                                                                                                                                                                                                                                                                                                                                                                                                                                                                                                                                                                                                                                                                                                                                                                                                                                                                                                                                                                                                                                                                                                                                                                                                                                             | 2.767503 | 0.000000 |          |          |   |   |      |          |  |  |  |  |     |          |          |  |  |  |      |          |          |          |  |  |     |          |          |          |          |  |      |          |          |          |          |          |     |          |          |          |          |          |     |          |          |          |          |          |     |          |          |          |          |          |     |          |          |          |          |          |  |   |   |   |   |  |     |          |  |  |  |  |     |          |          |  |  |  |     |          |          |          |  |  |     |          |          |          |          |  |
| 9 B                                           | 2.648249                                                                                                                                                                                                                                                                                                                                                                                                                                                                                                                                                                                                                                                                                                                                                                                                                                                                                                                                                                                                                                                                                                                                                                                                                                                                                                                                                                                                                                                                                             | 1.720306 | 1.724936 | 0.000000 |          |   |   |      |          |  |  |  |  |     |          |          |  |  |  |      |          |          |          |  |  |     |          |          |          |          |  |      |          |          |          |          |          |     |          |          |          |          |          |     |          |          |          |          |          |     |          |          |          |          |          |     |          |          |          |          |          |  |   |   |   |   |  |     |          |  |  |  |  |     |          |          |  |  |  |     |          |          |          |  |  |     |          |          |          |          |  |
| 4. -1809.757117 +13.2 H/L 2.15 C <sub>1</sub> | <table border="1"> <thead> <tr> <th></th> <th>1</th> <th>2</th> <th>3</th> <th>4</th> <th>5</th> </tr> </thead> <tbody> <tr><td>1 B</td><td>0.000000</td><td></td><td></td><td></td><td></td></tr> <tr><td>2 B</td><td>1.747970</td><td>0.000000</td><td></td><td></td><td></td></tr> <tr><td>3 B</td><td>2.729940</td><td>1.930917</td><td>0.000000</td><td></td><td></td></tr> <tr><td>4 B</td><td>1.747908</td><td>2.430800</td><td>1.930970</td><td>0.000000</td><td></td></tr> <tr><td>5 Co</td><td>1.948164</td><td>2.123575</td><td>2.763637</td><td>2.123603</td><td>0.000000</td></tr> <tr><td>6 B</td><td>3.046232</td><td>2.940034</td><td>1.963742</td><td>1.767565</td><td>2.060127</td></tr> <tr><td>7 N</td><td>3.627431</td><td>2.728327</td><td>1.610224</td><td>2.728416</td><td>2.658980</td></tr> <tr><td>8 B</td><td>3.046268</td><td>1.767609</td><td>1.963867</td><td>2.940096</td><td>2.060002</td></tr> <tr><td>9 B</td><td>1.673585</td><td>1.715087</td><td>1.730145</td><td>1.715188</td><td>2.926145</td></tr> <tr> <th></th> <th>6</th> <th>7</th> <th>8</th> <th>9</th> <th></th> </tr> <tr><td>6 B</td><td>0.000000</td><td></td><td></td><td></td><td></td></tr> <tr><td>7 N</td><td>1.476114</td><td>0.000000</td><td></td><td></td><td></td></tr> <tr><td>8 B</td><td>2.270700</td><td>1.476077</td><td>0.000000</td><td></td><td></td></tr> <tr><td>9 B</td><td>2.996119</td><td>3.200565</td><td>2.996176</td><td>0.000000</td><td></td></tr> </tbody> </table> |          | 1        | 2        | 3        | 4 | 5 | 1 B  | 0.000000 |  |  |  |  | 2 B | 1.747970 | 0.000000 |  |  |  | 3 B  | 2.729940 | 1.930917 | 0.000000 |  |  | 4 B | 1.747908 | 2.430800 | 1.930970 | 0.000000 |  | 5 Co | 1.948164 | 2.123575 | 2.763637 | 2.123603 | 0.000000 | 6 B | 3.046232 | 2.940034 | 1.963742 | 1.767565 | 2.060127 | 7 N | 3.627431 | 2.728327 | 1.610224 | 2.728416 | 2.658980 | 8 B | 3.046268 | 1.767609 | 1.963867 | 2.940096 | 2.060002 | 9 B | 1.673585 | 1.715087 | 1.730145 | 1.715188 | 2.926145 |  | 6 | 7 | 8 | 9 |  | 6 B | 0.000000 |  |  |  |  | 7 N | 1.476114 | 0.000000 |  |  |  | 8 B | 2.270700 | 1.476077 | 0.000000 |  |  | 9 B | 2.996119 | 3.200565 | 2.996176 | 0.000000 |  |
|                                               | 1                                                                                                                                                                                                                                                                                                                                                                                                                                                                                                                                                                                                                                                                                                                                                                                                                                                                                                                                                                                                                                                                                                                                                                                                                                                                                                                                                                                                                                                                                                    | 2        | 3        | 4        | 5        |   |   |      |          |  |  |  |  |     |          |          |  |  |  |      |          |          |          |  |  |     |          |          |          |          |  |      |          |          |          |          |          |     |          |          |          |          |          |     |          |          |          |          |          |     |          |          |          |          |          |     |          |          |          |          |          |  |   |   |   |   |  |     |          |  |  |  |  |     |          |          |  |  |  |     |          |          |          |  |  |     |          |          |          |          |  |
| 1 B                                           | 0.000000                                                                                                                                                                                                                                                                                                                                                                                                                                                                                                                                                                                                                                                                                                                                                                                                                                                                                                                                                                                                                                                                                                                                                                                                                                                                                                                                                                                                                                                                                             |          |          |          |          |   |   |      |          |  |  |  |  |     |          |          |  |  |  |      |          |          |          |  |  |     |          |          |          |          |  |      |          |          |          |          |          |     |          |          |          |          |          |     |          |          |          |          |          |     |          |          |          |          |          |     |          |          |          |          |          |  |   |   |   |   |  |     |          |  |  |  |  |     |          |          |  |  |  |     |          |          |          |  |  |     |          |          |          |          |  |
| 2 B                                           | 1.747970                                                                                                                                                                                                                                                                                                                                                                                                                                                                                                                                                                                                                                                                                                                                                                                                                                                                                                                                                                                                                                                                                                                                                                                                                                                                                                                                                                                                                                                                                             | 0.000000 |          |          |          |   |   |      |          |  |  |  |  |     |          |          |  |  |  |      |          |          |          |  |  |     |          |          |          |          |  |      |          |          |          |          |          |     |          |          |          |          |          |     |          |          |          |          |          |     |          |          |          |          |          |     |          |          |          |          |          |  |   |   |   |   |  |     |          |  |  |  |  |     |          |          |  |  |  |     |          |          |          |  |  |     |          |          |          |          |  |
| 3 B                                           | 2.729940                                                                                                                                                                                                                                                                                                                                                                                                                                                                                                                                                                                                                                                                                                                                                                                                                                                                                                                                                                                                                                                                                                                                                                                                                                                                                                                                                                                                                                                                                             | 1.930917 | 0.000000 |          |          |   |   |      |          |  |  |  |  |     |          |          |  |  |  |      |          |          |          |  |  |     |          |          |          |          |  |      |          |          |          |          |          |     |          |          |          |          |          |     |          |          |          |          |          |     |          |          |          |          |          |     |          |          |          |          |          |  |   |   |   |   |  |     |          |  |  |  |  |     |          |          |  |  |  |     |          |          |          |  |  |     |          |          |          |          |  |
| 4 B                                           | 1.747908                                                                                                                                                                                                                                                                                                                                                                                                                                                                                                                                                                                                                                                                                                                                                                                                                                                                                                                                                                                                                                                                                                                                                                                                                                                                                                                                                                                                                                                                                             | 2.430800 | 1.930970 | 0.000000 |          |   |   |      |          |  |  |  |  |     |          |          |  |  |  |      |          |          |          |  |  |     |          |          |          |          |  |      |          |          |          |          |          |     |          |          |          |          |          |     |          |          |          |          |          |     |          |          |          |          |          |     |          |          |          |          |          |  |   |   |   |   |  |     |          |  |  |  |  |     |          |          |  |  |  |     |          |          |          |  |  |     |          |          |          |          |  |
| 5 Co                                          | 1.948164                                                                                                                                                                                                                                                                                                                                                                                                                                                                                                                                                                                                                                                                                                                                                                                                                                                                                                                                                                                                                                                                                                                                                                                                                                                                                                                                                                                                                                                                                             | 2.123575 | 2.763637 | 2.123603 | 0.000000 |   |   |      |          |  |  |  |  |     |          |          |  |  |  |      |          |          |          |  |  |     |          |          |          |          |  |      |          |          |          |          |          |     |          |          |          |          |          |     |          |          |          |          |          |     |          |          |          |          |          |     |          |          |          |          |          |  |   |   |   |   |  |     |          |  |  |  |  |     |          |          |  |  |  |     |          |          |          |  |  |     |          |          |          |          |  |
| 6 B                                           | 3.046232                                                                                                                                                                                                                                                                                                                                                                                                                                                                                                                                                                                                                                                                                                                                                                                                                                                                                                                                                                                                                                                                                                                                                                                                                                                                                                                                                                                                                                                                                             | 2.940034 | 1.963742 | 1.767565 | 2.060127 |   |   |      |          |  |  |  |  |     |          |          |  |  |  |      |          |          |          |  |  |     |          |          |          |          |  |      |          |          |          |          |          |     |          |          |          |          |          |     |          |          |          |          |          |     |          |          |          |          |          |     |          |          |          |          |          |  |   |   |   |   |  |     |          |  |  |  |  |     |          |          |  |  |  |     |          |          |          |  |  |     |          |          |          |          |  |
| 7 N                                           | 3.627431                                                                                                                                                                                                                                                                                                                                                                                                                                                                                                                                                                                                                                                                                                                                                                                                                                                                                                                                                                                                                                                                                                                                                                                                                                                                                                                                                                                                                                                                                             | 2.728327 | 1.610224 | 2.728416 | 2.658980 |   |   |      |          |  |  |  |  |     |          |          |  |  |  |      |          |          |          |  |  |     |          |          |          |          |  |      |          |          |          |          |          |     |          |          |          |          |          |     |          |          |          |          |          |     |          |          |          |          |          |     |          |          |          |          |          |  |   |   |   |   |  |     |          |  |  |  |  |     |          |          |  |  |  |     |          |          |          |  |  |     |          |          |          |          |  |
| 8 B                                           | 3.046268                                                                                                                                                                                                                                                                                                                                                                                                                                                                                                                                                                                                                                                                                                                                                                                                                                                                                                                                                                                                                                                                                                                                                                                                                                                                                                                                                                                                                                                                                             | 1.767609 | 1.963867 | 2.940096 | 2.060002 |   |   |      |          |  |  |  |  |     |          |          |  |  |  |      |          |          |          |  |  |     |          |          |          |          |  |      |          |          |          |          |          |     |          |          |          |          |          |     |          |          |          |          |          |     |          |          |          |          |          |     |          |          |          |          |          |  |   |   |   |   |  |     |          |  |  |  |  |     |          |          |  |  |  |     |          |          |          |  |  |     |          |          |          |          |  |
| 9 B                                           | 1.673585                                                                                                                                                                                                                                                                                                                                                                                                                                                                                                                                                                                                                                                                                                                                                                                                                                                                                                                                                                                                                                                                                                                                                                                                                                                                                                                                                                                                                                                                                             | 1.715087 | 1.730145 | 1.715188 | 2.926145 |   |   |      |          |  |  |  |  |     |          |          |  |  |  |      |          |          |          |  |  |     |          |          |          |          |  |      |          |          |          |          |          |     |          |          |          |          |          |     |          |          |          |          |          |     |          |          |          |          |          |     |          |          |          |          |          |  |   |   |   |   |  |     |          |  |  |  |  |     |          |          |  |  |  |     |          |          |          |  |  |     |          |          |          |          |  |
|                                               | 6                                                                                                                                                                                                                                                                                                                                                                                                                                                                                                                                                                                                                                                                                                                                                                                                                                                                                                                                                                                                                                                                                                                                                                                                                                                                                                                                                                                                                                                                                                    | 7        | 8        | 9        |          |   |   |      |          |  |  |  |  |     |          |          |  |  |  |      |          |          |          |  |  |     |          |          |          |          |  |      |          |          |          |          |          |     |          |          |          |          |          |     |          |          |          |          |          |     |          |          |          |          |          |     |          |          |          |          |          |  |   |   |   |   |  |     |          |  |  |  |  |     |          |          |  |  |  |     |          |          |          |  |  |     |          |          |          |          |  |
| 6 B                                           | 0.000000                                                                                                                                                                                                                                                                                                                                                                                                                                                                                                                                                                                                                                                                                                                                                                                                                                                                                                                                                                                                                                                                                                                                                                                                                                                                                                                                                                                                                                                                                             |          |          |          |          |   |   |      |          |  |  |  |  |     |          |          |  |  |  |      |          |          |          |  |  |     |          |          |          |          |  |      |          |          |          |          |          |     |          |          |          |          |          |     |          |          |          |          |          |     |          |          |          |          |          |     |          |          |          |          |          |  |   |   |   |   |  |     |          |  |  |  |  |     |          |          |  |  |  |     |          |          |          |  |  |     |          |          |          |          |  |
| 7 N                                           | 1.476114                                                                                                                                                                                                                                                                                                                                                                                                                                                                                                                                                                                                                                                                                                                                                                                                                                                                                                                                                                                                                                                                                                                                                                                                                                                                                                                                                                                                                                                                                             | 0.000000 |          |          |          |   |   |      |          |  |  |  |  |     |          |          |  |  |  |      |          |          |          |  |  |     |          |          |          |          |  |      |          |          |          |          |          |     |          |          |          |          |          |     |          |          |          |          |          |     |          |          |          |          |          |     |          |          |          |          |          |  |   |   |   |   |  |     |          |  |  |  |  |     |          |          |  |  |  |     |          |          |          |  |  |     |          |          |          |          |  |
| 8 B                                           | 2.270700                                                                                                                                                                                                                                                                                                                                                                                                                                                                                                                                                                                                                                                                                                                                                                                                                                                                                                                                                                                                                                                                                                                                                                                                                                                                                                                                                                                                                                                                                             | 1.476077 | 0.000000 |          |          |   |   |      |          |  |  |  |  |     |          |          |  |  |  |      |          |          |          |  |  |     |          |          |          |          |  |      |          |          |          |          |          |     |          |          |          |          |          |     |          |          |          |          |          |     |          |          |          |          |          |     |          |          |          |          |          |  |   |   |   |   |  |     |          |  |  |  |  |     |          |          |  |  |  |     |          |          |          |  |  |     |          |          |          |          |  |
| 9 B                                           | 2.996119                                                                                                                                                                                                                                                                                                                                                                                                                                                                                                                                                                                                                                                                                                                                                                                                                                                                                                                                                                                                                                                                                                                                                                                                                                                                                                                                                                                                                                                                                             | 3.200565 | 2.996176 | 0.000000 |          |   |   |      |          |  |  |  |  |     |          |          |  |  |  |      |          |          |          |  |  |     |          |          |          |          |  |      |          |          |          |          |          |     |          |          |          |          |          |     |          |          |          |          |          |     |          |          |          |          |          |     |          |          |          |          |          |  |   |   |   |   |  |     |          |  |  |  |  |     |          |          |  |  |  |     |          |          |          |  |  |     |          |          |          |          |  |
| 5. -1809.753806 +15.3 H/L 3.23 C <sub>s</sub> | <table border="1"> <thead> <tr> <th></th> <th>1</th> <th>2</th> <th>3</th> <th>4</th> <th>5</th> </tr> </thead> <tbody> <tr><td>1 Co</td><td>0.000000</td><td></td><td></td><td></td><td></td></tr> <tr><td>2 B</td><td>2.055749</td><td>0.000000</td><td></td><td></td><td></td></tr> <tr><td>3 N</td><td>2.796514</td><td>1.565070</td><td>0.000000</td><td></td><td></td></tr> <tr><td>4 B</td><td>2.083259</td><td>2.664802</td><td>2.387337</td><td>0.000000</td><td></td></tr> <tr><td>5 B</td><td>1.987648</td><td>3.005735</td><td>3.566067</td><td>1.768142</td><td>0.000000</td></tr> <tr><td>6 B</td><td>2.966085</td><td>2.945315</td><td>3.021208</td><td>1.653182</td><td>1.649517</td></tr> <tr><td>7 B</td><td>2.931679</td><td>1.821577</td><td>1.576208</td><td>2.033220</td><td>2.758606</td></tr> <tr><td>8 B</td><td>2.118215</td><td>1.740224</td><td>2.752459</td><td>2.358680</td><td>1.754574</td></tr> <tr><td>9 B</td><td>1.974547</td><td>2.045630</td><td>1.450189</td><td>1.879041</td><td>3.155501</td></tr> <tr> <th></th> <th>6</th> <th>7</th> <th>8</th> <th>9</th> <th></th> </tr> <tr><td>6 B</td><td>0.000000</td><td></td><td></td><td></td><td></td></tr> <tr><td>7 B</td><td>1.716265</td><td>0.000000</td><td></td><td></td><td></td></tr> <tr><td>8 B</td><td>1.825525</td><td>1.832061</td><td>0.000000</td><td></td><td></td></tr> <tr><td>9 B</td><td>3.198081</td><td>2.442779</td><td>2.987698</td><td>0.000000</td><td></td></tr> </tbody> </table> |          | 1        | 2        | 3        | 4 | 5 | 1 Co | 0.000000 |  |  |  |  | 2 B | 2.055749 | 0.000000 |  |  |  | 3 N  | 2.796514 | 1.565070 | 0.000000 |  |  | 4 B | 2.083259 | 2.664802 | 2.387337 | 0.000000 |  | 5 B  | 1.987648 | 3.005735 | 3.566067 | 1.768142 | 0.000000 | 6 B | 2.966085 | 2.945315 | 3.021208 | 1.653182 | 1.649517 | 7 B | 2.931679 | 1.821577 | 1.576208 | 2.033220 | 2.758606 | 8 B | 2.118215 | 1.740224 | 2.752459 | 2.358680 | 1.754574 | 9 B | 1.974547 | 2.045630 | 1.450189 | 1.879041 | 3.155501 |  | 6 | 7 | 8 | 9 |  | 6 B | 0.000000 |  |  |  |  | 7 B | 1.716265 | 0.000000 |  |  |  | 8 B | 1.825525 | 1.832061 | 0.000000 |  |  | 9 B | 3.198081 | 2.442779 | 2.987698 | 0.000000 |  |
|                                               | 1                                                                                                                                                                                                                                                                                                                                                                                                                                                                                                                                                                                                                                                                                                                                                                                                                                                                                                                                                                                                                                                                                                                                                                                                                                                                                                                                                                                                                                                                                                    | 2        | 3        | 4        | 5        |   |   |      |          |  |  |  |  |     |          |          |  |  |  |      |          |          |          |  |  |     |          |          |          |          |  |      |          |          |          |          |          |     |          |          |          |          |          |     |          |          |          |          |          |     |          |          |          |          |          |     |          |          |          |          |          |  |   |   |   |   |  |     |          |  |  |  |  |     |          |          |  |  |  |     |          |          |          |  |  |     |          |          |          |          |  |
| 1 Co                                          | 0.000000                                                                                                                                                                                                                                                                                                                                                                                                                                                                                                                                                                                                                                                                                                                                                                                                                                                                                                                                                                                                                                                                                                                                                                                                                                                                                                                                                                                                                                                                                             |          |          |          |          |   |   |      |          |  |  |  |  |     |          |          |  |  |  |      |          |          |          |  |  |     |          |          |          |          |  |      |          |          |          |          |          |     |          |          |          |          |          |     |          |          |          |          |          |     |          |          |          |          |          |     |          |          |          |          |          |  |   |   |   |   |  |     |          |  |  |  |  |     |          |          |  |  |  |     |          |          |          |  |  |     |          |          |          |          |  |
| 2 B                                           | 2.055749                                                                                                                                                                                                                                                                                                                                                                                                                                                                                                                                                                                                                                                                                                                                                                                                                                                                                                                                                                                                                                                                                                                                                                                                                                                                                                                                                                                                                                                                                             | 0.000000 |          |          |          |   |   |      |          |  |  |  |  |     |          |          |  |  |  |      |          |          |          |  |  |     |          |          |          |          |  |      |          |          |          |          |          |     |          |          |          |          |          |     |          |          |          |          |          |     |          |          |          |          |          |     |          |          |          |          |          |  |   |   |   |   |  |     |          |  |  |  |  |     |          |          |  |  |  |     |          |          |          |  |  |     |          |          |          |          |  |
| 3 N                                           | 2.796514                                                                                                                                                                                                                                                                                                                                                                                                                                                                                                                                                                                                                                                                                                                                                                                                                                                                                                                                                                                                                                                                                                                                                                                                                                                                                                                                                                                                                                                                                             | 1.565070 | 0.000000 |          |          |   |   |      |          |  |  |  |  |     |          |          |  |  |  |      |          |          |          |  |  |     |          |          |          |          |  |      |          |          |          |          |          |     |          |          |          |          |          |     |          |          |          |          |          |     |          |          |          |          |          |     |          |          |          |          |          |  |   |   |   |   |  |     |          |  |  |  |  |     |          |          |  |  |  |     |          |          |          |  |  |     |          |          |          |          |  |
| 4 B                                           | 2.083259                                                                                                                                                                                                                                                                                                                                                                                                                                                                                                                                                                                                                                                                                                                                                                                                                                                                                                                                                                                                                                                                                                                                                                                                                                                                                                                                                                                                                                                                                             | 2.664802 | 2.387337 | 0.000000 |          |   |   |      |          |  |  |  |  |     |          |          |  |  |  |      |          |          |          |  |  |     |          |          |          |          |  |      |          |          |          |          |          |     |          |          |          |          |          |     |          |          |          |          |          |     |          |          |          |          |          |     |          |          |          |          |          |  |   |   |   |   |  |     |          |  |  |  |  |     |          |          |  |  |  |     |          |          |          |  |  |     |          |          |          |          |  |
| 5 B                                           | 1.987648                                                                                                                                                                                                                                                                                                                                                                                                                                                                                                                                                                                                                                                                                                                                                                                                                                                                                                                                                                                                                                                                                                                                                                                                                                                                                                                                                                                                                                                                                             | 3.005735 | 3.566067 | 1.768142 | 0.000000 |   |   |      |          |  |  |  |  |     |          |          |  |  |  |      |          |          |          |  |  |     |          |          |          |          |  |      |          |          |          |          |          |     |          |          |          |          |          |     |          |          |          |          |          |     |          |          |          |          |          |     |          |          |          |          |          |  |   |   |   |   |  |     |          |  |  |  |  |     |          |          |  |  |  |     |          |          |          |  |  |     |          |          |          |          |  |
| 6 B                                           | 2.966085                                                                                                                                                                                                                                                                                                                                                                                                                                                                                                                                                                                                                                                                                                                                                                                                                                                                                                                                                                                                                                                                                                                                                                                                                                                                                                                                                                                                                                                                                             | 2.945315 | 3.021208 | 1.653182 | 1.649517 |   |   |      |          |  |  |  |  |     |          |          |  |  |  |      |          |          |          |  |  |     |          |          |          |          |  |      |          |          |          |          |          |     |          |          |          |          |          |     |          |          |          |          |          |     |          |          |          |          |          |     |          |          |          |          |          |  |   |   |   |   |  |     |          |  |  |  |  |     |          |          |  |  |  |     |          |          |          |  |  |     |          |          |          |          |  |
| 7 B                                           | 2.931679                                                                                                                                                                                                                                                                                                                                                                                                                                                                                                                                                                                                                                                                                                                                                                                                                                                                                                                                                                                                                                                                                                                                                                                                                                                                                                                                                                                                                                                                                             | 1.821577 | 1.576208 | 2.033220 | 2.758606 |   |   |      |          |  |  |  |  |     |          |          |  |  |  |      |          |          |          |  |  |     |          |          |          |          |  |      |          |          |          |          |          |     |          |          |          |          |          |     |          |          |          |          |          |     |          |          |          |          |          |     |          |          |          |          |          |  |   |   |   |   |  |     |          |  |  |  |  |     |          |          |  |  |  |     |          |          |          |  |  |     |          |          |          |          |  |
| 8 B                                           | 2.118215                                                                                                                                                                                                                                                                                                                                                                                                                                                                                                                                                                                                                                                                                                                                                                                                                                                                                                                                                                                                                                                                                                                                                                                                                                                                                                                                                                                                                                                                                             | 1.740224 | 2.752459 | 2.358680 | 1.754574 |   |   |      |          |  |  |  |  |     |          |          |  |  |  |      |          |          |          |  |  |     |          |          |          |          |  |      |          |          |          |          |          |     |          |          |          |          |          |     |          |          |          |          |          |     |          |          |          |          |          |     |          |          |          |          |          |  |   |   |   |   |  |     |          |  |  |  |  |     |          |          |  |  |  |     |          |          |          |  |  |     |          |          |          |          |  |
| 9 B                                           | 1.974547                                                                                                                                                                                                                                                                                                                                                                                                                                                                                                                                                                                                                                                                                                                                                                                                                                                                                                                                                                                                                                                                                                                                                                                                                                                                                                                                                                                                                                                                                             | 2.045630 | 1.450189 | 1.879041 | 3.155501 |   |   |      |          |  |  |  |  |     |          |          |  |  |  |      |          |          |          |  |  |     |          |          |          |          |  |      |          |          |          |          |          |     |          |          |          |          |          |     |          |          |          |          |          |     |          |          |          |          |          |     |          |          |          |          |          |  |   |   |   |   |  |     |          |  |  |  |  |     |          |          |  |  |  |     |          |          |          |  |  |     |          |          |          |          |  |
|                                               | 6                                                                                                                                                                                                                                                                                                                                                                                                                                                                                                                                                                                                                                                                                                                                                                                                                                                                                                                                                                                                                                                                                                                                                                                                                                                                                                                                                                                                                                                                                                    | 7        | 8        | 9        |          |   |   |      |          |  |  |  |  |     |          |          |  |  |  |      |          |          |          |  |  |     |          |          |          |          |  |      |          |          |          |          |          |     |          |          |          |          |          |     |          |          |          |          |          |     |          |          |          |          |          |     |          |          |          |          |          |  |   |   |   |   |  |     |          |  |  |  |  |     |          |          |  |  |  |     |          |          |          |  |  |     |          |          |          |          |  |
| 6 B                                           | 0.000000                                                                                                                                                                                                                                                                                                                                                                                                                                                                                                                                                                                                                                                                                                                                                                                                                                                                                                                                                                                                                                                                                                                                                                                                                                                                                                                                                                                                                                                                                             |          |          |          |          |   |   |      |          |  |  |  |  |     |          |          |  |  |  |      |          |          |          |  |  |     |          |          |          |          |  |      |          |          |          |          |          |     |          |          |          |          |          |     |          |          |          |          |          |     |          |          |          |          |          |     |          |          |          |          |          |  |   |   |   |   |  |     |          |  |  |  |  |     |          |          |  |  |  |     |          |          |          |  |  |     |          |          |          |          |  |
| 7 B                                           | 1.716265                                                                                                                                                                                                                                                                                                                                                                                                                                                                                                                                                                                                                                                                                                                                                                                                                                                                                                                                                                                                                                                                                                                                                                                                                                                                                                                                                                                                                                                                                             | 0.000000 |          |          |          |   |   |      |          |  |  |  |  |     |          |          |  |  |  |      |          |          |          |  |  |     |          |          |          |          |  |      |          |          |          |          |          |     |          |          |          |          |          |     |          |          |          |          |          |     |          |          |          |          |          |     |          |          |          |          |          |  |   |   |   |   |  |     |          |  |  |  |  |     |          |          |  |  |  |     |          |          |          |  |  |     |          |          |          |          |  |
| 8 B                                           | 1.825525                                                                                                                                                                                                                                                                                                                                                                                                                                                                                                                                                                                                                                                                                                                                                                                                                                                                                                                                                                                                                                                                                                                                                                                                                                                                                                                                                                                                                                                                                             | 1.832061 | 0.000000 |          |          |   |   |      |          |  |  |  |  |     |          |          |  |  |  |      |          |          |          |  |  |     |          |          |          |          |  |      |          |          |          |          |          |     |          |          |          |          |          |     |          |          |          |          |          |     |          |          |          |          |          |     |          |          |          |          |          |  |   |   |   |   |  |     |          |  |  |  |  |     |          |          |  |  |  |     |          |          |          |  |  |     |          |          |          |          |  |
| 9 B                                           | 3.198081                                                                                                                                                                                                                                                                                                                                                                                                                                                                                                                                                                                                                                                                                                                                                                                                                                                                                                                                                                                                                                                                                                                                                                                                                                                                                                                                                                                                                                                                                             | 2.442779 | 2.987698 | 0.000000 |          |   |   |      |          |  |  |  |  |     |          |          |  |  |  |      |          |          |          |  |  |     |          |          |          |          |  |      |          |          |          |          |          |     |          |          |          |          |          |     |          |          |          |          |          |     |          |          |          |          |          |     |          |          |          |          |          |  |   |   |   |   |  |     |          |  |  |  |  |     |          |          |  |  |  |     |          |          |          |  |  |     |          |          |          |          |  |
| 6. -1809.750920 +17.1 H/L 3.06 C <sub>1</sub> |                                                                                                                                                                                                                                                                                                                                                                                                                                                                                                                                                                                                                                                                                                                                                                                                                                                                                                                                                                                                                                                                                                                                                                                                                                                                                                                                                                                                                                                                                                      |          |          |          |          |   |   |      |          |  |  |  |  |     |          |          |  |  |  |      |          |          |          |  |  |     |          |          |          |          |  |      |          |          |          |          |          |     |          |          |          |          |          |     |          |          |          |          |          |     |          |          |          |          |          |     |          |          |          |          |          |  |   |   |   |   |  |     |          |  |  |  |  |     |          |          |  |  |  |     |          |          |          |  |  |     |          |          |          |          |  |

| 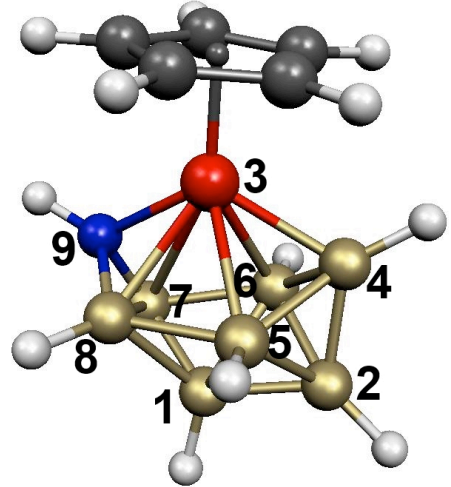 <p>7. -1809.749703 +17.8 H/L 2.46 C<sub>1</sub></p> | <table border="1"> <thead> <tr> <th></th> <th>1</th> <th>2</th> <th>3</th> <th>4</th> <th>5</th> </tr> </thead> <tbody> <tr><td>1 B</td><td>0.000000</td><td></td><td></td><td></td><td></td></tr> <tr><td>2 B</td><td>1.675424</td><td>0.000000</td><td></td><td></td><td></td></tr> <tr><td>3 Co</td><td>2.900232</td><td>3.072024</td><td>0.000000</td><td></td><td></td></tr> <tr><td>4 B</td><td>2.639762</td><td>1.649496</td><td>2.019992</td><td>0.000000</td><td></td></tr> <tr><td>5 B</td><td>1.817113</td><td>1.731372</td><td>2.143125</td><td>1.782809</td><td>0.000000</td></tr> <tr><td>6 B</td><td>1.817799</td><td>1.751163</td><td>2.230241</td><td>1.725163</td><td>2.338858</td></tr> <tr><td>7 B</td><td>1.734568</td><td>3.005966</td><td>2.654356</td><td>3.284576</td><td>2.920689</td></tr> <tr><td>8 B</td><td>1.811765</td><td>2.979633</td><td>2.149068</td><td>3.079837</td><td>1.820165</td></tr> <tr><td>9 N</td><td>2.542795</td><td>3.662638</td><td>1.932536</td><td>3.407552</td><td>2.878582</td></tr> <tr> <th></th> <th>6</th> <th>7</th> <th>8</th> <th>9</th> <th></th> </tr> <tr><td>6 B</td><td>0.000000</td><td></td><td></td><td></td><td></td></tr> <tr><td>7 B</td><td>1.874342</td><td>0.000000</td><td></td><td></td><td></td></tr> <tr><td>8 B</td><td>2.683595</td><td>1.948485</td><td>0.000000</td><td></td><td></td></tr> <tr><td>9 N</td><td>2.570978</td><td>1.440912</td><td>1.497959</td><td>0.000000</td><td></td></tr> </tbody> </table> |          | 1        | 2        | 3        | 4 | 5 | 1 B | 0.000000 |  |  |  |  | 2 B | 1.675424 | 0.000000 |  |  |  | 3 Co | 2.900232 | 3.072024 | 0.000000 |  |  | 4 B  | 2.639762 | 1.649496 | 2.019992 | 0.000000 |  | 5 B | 1.817113 | 1.731372 | 2.143125 | 1.782809 | 0.000000 | 6 B | 1.817799 | 1.751163 | 2.230241 | 1.725163 | 2.338858 | 7 B | 1.734568 | 3.005966 | 2.654356 | 3.284576 | 2.920689 | 8 B | 1.811765 | 2.979633 | 2.149068 | 3.079837 | 1.820165 | 9 N | 2.542795 | 3.662638 | 1.932536 | 3.407552 | 2.878582 |  | 6 | 7 | 8 | 9 |  | 6 B | 0.000000 |  |  |  |  | 7 B | 1.874342 | 0.000000 |  |  |  | 8 B | 2.683595 | 1.948485 | 0.000000 |  |  | 9 N | 2.570978 | 1.440912 | 1.497959 | 0.000000 |  |
|---------------------------------------------------------------------------------------------------------------------------------------|------------------------------------------------------------------------------------------------------------------------------------------------------------------------------------------------------------------------------------------------------------------------------------------------------------------------------------------------------------------------------------------------------------------------------------------------------------------------------------------------------------------------------------------------------------------------------------------------------------------------------------------------------------------------------------------------------------------------------------------------------------------------------------------------------------------------------------------------------------------------------------------------------------------------------------------------------------------------------------------------------------------------------------------------------------------------------------------------------------------------------------------------------------------------------------------------------------------------------------------------------------------------------------------------------------------------------------------------------------------------------------------------------------------------------------------------------------------------------------------------------|----------|----------|----------|----------|---|---|-----|----------|--|--|--|--|-----|----------|----------|--|--|--|------|----------|----------|----------|--|--|------|----------|----------|----------|----------|--|-----|----------|----------|----------|----------|----------|-----|----------|----------|----------|----------|----------|-----|----------|----------|----------|----------|----------|-----|----------|----------|----------|----------|----------|-----|----------|----------|----------|----------|----------|--|---|---|---|---|--|-----|----------|--|--|--|--|-----|----------|----------|--|--|--|-----|----------|----------|----------|--|--|-----|----------|----------|----------|----------|--|
|                                                                                                                                       | 1                                                                                                                                                                                                                                                                                                                                                                                                                                                                                                                                                                                                                                                                                                                                                                                                                                                                                                                                                                                                                                                                                                                                                                                                                                                                                                                                                                                                                                                                                                    | 2        | 3        | 4        | 5        |   |   |     |          |  |  |  |  |     |          |          |  |  |  |      |          |          |          |  |  |      |          |          |          |          |  |     |          |          |          |          |          |     |          |          |          |          |          |     |          |          |          |          |          |     |          |          |          |          |          |     |          |          |          |          |          |  |   |   |   |   |  |     |          |  |  |  |  |     |          |          |  |  |  |     |          |          |          |  |  |     |          |          |          |          |  |
| 1 B                                                                                                                                   | 0.000000                                                                                                                                                                                                                                                                                                                                                                                                                                                                                                                                                                                                                                                                                                                                                                                                                                                                                                                                                                                                                                                                                                                                                                                                                                                                                                                                                                                                                                                                                             |          |          |          |          |   |   |     |          |  |  |  |  |     |          |          |  |  |  |      |          |          |          |  |  |      |          |          |          |          |  |     |          |          |          |          |          |     |          |          |          |          |          |     |          |          |          |          |          |     |          |          |          |          |          |     |          |          |          |          |          |  |   |   |   |   |  |     |          |  |  |  |  |     |          |          |  |  |  |     |          |          |          |  |  |     |          |          |          |          |  |
| 2 B                                                                                                                                   | 1.675424                                                                                                                                                                                                                                                                                                                                                                                                                                                                                                                                                                                                                                                                                                                                                                                                                                                                                                                                                                                                                                                                                                                                                                                                                                                                                                                                                                                                                                                                                             | 0.000000 |          |          |          |   |   |     |          |  |  |  |  |     |          |          |  |  |  |      |          |          |          |  |  |      |          |          |          |          |  |     |          |          |          |          |          |     |          |          |          |          |          |     |          |          |          |          |          |     |          |          |          |          |          |     |          |          |          |          |          |  |   |   |   |   |  |     |          |  |  |  |  |     |          |          |  |  |  |     |          |          |          |  |  |     |          |          |          |          |  |
| 3 Co                                                                                                                                  | 2.900232                                                                                                                                                                                                                                                                                                                                                                                                                                                                                                                                                                                                                                                                                                                                                                                                                                                                                                                                                                                                                                                                                                                                                                                                                                                                                                                                                                                                                                                                                             | 3.072024 | 0.000000 |          |          |   |   |     |          |  |  |  |  |     |          |          |  |  |  |      |          |          |          |  |  |      |          |          |          |          |  |     |          |          |          |          |          |     |          |          |          |          |          |     |          |          |          |          |          |     |          |          |          |          |          |     |          |          |          |          |          |  |   |   |   |   |  |     |          |  |  |  |  |     |          |          |  |  |  |     |          |          |          |  |  |     |          |          |          |          |  |
| 4 B                                                                                                                                   | 2.639762                                                                                                                                                                                                                                                                                                                                                                                                                                                                                                                                                                                                                                                                                                                                                                                                                                                                                                                                                                                                                                                                                                                                                                                                                                                                                                                                                                                                                                                                                             | 1.649496 | 2.019992 | 0.000000 |          |   |   |     |          |  |  |  |  |     |          |          |  |  |  |      |          |          |          |  |  |      |          |          |          |          |  |     |          |          |          |          |          |     |          |          |          |          |          |     |          |          |          |          |          |     |          |          |          |          |          |     |          |          |          |          |          |  |   |   |   |   |  |     |          |  |  |  |  |     |          |          |  |  |  |     |          |          |          |  |  |     |          |          |          |          |  |
| 5 B                                                                                                                                   | 1.817113                                                                                                                                                                                                                                                                                                                                                                                                                                                                                                                                                                                                                                                                                                                                                                                                                                                                                                                                                                                                                                                                                                                                                                                                                                                                                                                                                                                                                                                                                             | 1.731372 | 2.143125 | 1.782809 | 0.000000 |   |   |     |          |  |  |  |  |     |          |          |  |  |  |      |          |          |          |  |  |      |          |          |          |          |  |     |          |          |          |          |          |     |          |          |          |          |          |     |          |          |          |          |          |     |          |          |          |          |          |     |          |          |          |          |          |  |   |   |   |   |  |     |          |  |  |  |  |     |          |          |  |  |  |     |          |          |          |  |  |     |          |          |          |          |  |
| 6 B                                                                                                                                   | 1.817799                                                                                                                                                                                                                                                                                                                                                                                                                                                                                                                                                                                                                                                                                                                                                                                                                                                                                                                                                                                                                                                                                                                                                                                                                                                                                                                                                                                                                                                                                             | 1.751163 | 2.230241 | 1.725163 | 2.338858 |   |   |     |          |  |  |  |  |     |          |          |  |  |  |      |          |          |          |  |  |      |          |          |          |          |  |     |          |          |          |          |          |     |          |          |          |          |          |     |          |          |          |          |          |     |          |          |          |          |          |     |          |          |          |          |          |  |   |   |   |   |  |     |          |  |  |  |  |     |          |          |  |  |  |     |          |          |          |  |  |     |          |          |          |          |  |
| 7 B                                                                                                                                   | 1.734568                                                                                                                                                                                                                                                                                                                                                                                                                                                                                                                                                                                                                                                                                                                                                                                                                                                                                                                                                                                                                                                                                                                                                                                                                                                                                                                                                                                                                                                                                             | 3.005966 | 2.654356 | 3.284576 | 2.920689 |   |   |     |          |  |  |  |  |     |          |          |  |  |  |      |          |          |          |  |  |      |          |          |          |          |  |     |          |          |          |          |          |     |          |          |          |          |          |     |          |          |          |          |          |     |          |          |          |          |          |     |          |          |          |          |          |  |   |   |   |   |  |     |          |  |  |  |  |     |          |          |  |  |  |     |          |          |          |  |  |     |          |          |          |          |  |
| 8 B                                                                                                                                   | 1.811765                                                                                                                                                                                                                                                                                                                                                                                                                                                                                                                                                                                                                                                                                                                                                                                                                                                                                                                                                                                                                                                                                                                                                                                                                                                                                                                                                                                                                                                                                             | 2.979633 | 2.149068 | 3.079837 | 1.820165 |   |   |     |          |  |  |  |  |     |          |          |  |  |  |      |          |          |          |  |  |      |          |          |          |          |  |     |          |          |          |          |          |     |          |          |          |          |          |     |          |          |          |          |          |     |          |          |          |          |          |     |          |          |          |          |          |  |   |   |   |   |  |     |          |  |  |  |  |     |          |          |  |  |  |     |          |          |          |  |  |     |          |          |          |          |  |
| 9 N                                                                                                                                   | 2.542795                                                                                                                                                                                                                                                                                                                                                                                                                                                                                                                                                                                                                                                                                                                                                                                                                                                                                                                                                                                                                                                                                                                                                                                                                                                                                                                                                                                                                                                                                             | 3.662638 | 1.932536 | 3.407552 | 2.878582 |   |   |     |          |  |  |  |  |     |          |          |  |  |  |      |          |          |          |  |  |      |          |          |          |          |  |     |          |          |          |          |          |     |          |          |          |          |          |     |          |          |          |          |          |     |          |          |          |          |          |     |          |          |          |          |          |  |   |   |   |   |  |     |          |  |  |  |  |     |          |          |  |  |  |     |          |          |          |  |  |     |          |          |          |          |  |
|                                                                                                                                       | 6                                                                                                                                                                                                                                                                                                                                                                                                                                                                                                                                                                                                                                                                                                                                                                                                                                                                                                                                                                                                                                                                                                                                                                                                                                                                                                                                                                                                                                                                                                    | 7        | 8        | 9        |          |   |   |     |          |  |  |  |  |     |          |          |  |  |  |      |          |          |          |  |  |      |          |          |          |          |  |     |          |          |          |          |          |     |          |          |          |          |          |     |          |          |          |          |          |     |          |          |          |          |          |     |          |          |          |          |          |  |   |   |   |   |  |     |          |  |  |  |  |     |          |          |  |  |  |     |          |          |          |  |  |     |          |          |          |          |  |
| 6 B                                                                                                                                   | 0.000000                                                                                                                                                                                                                                                                                                                                                                                                                                                                                                                                                                                                                                                                                                                                                                                                                                                                                                                                                                                                                                                                                                                                                                                                                                                                                                                                                                                                                                                                                             |          |          |          |          |   |   |     |          |  |  |  |  |     |          |          |  |  |  |      |          |          |          |  |  |      |          |          |          |          |  |     |          |          |          |          |          |     |          |          |          |          |          |     |          |          |          |          |          |     |          |          |          |          |          |     |          |          |          |          |          |  |   |   |   |   |  |     |          |  |  |  |  |     |          |          |  |  |  |     |          |          |          |  |  |     |          |          |          |          |  |
| 7 B                                                                                                                                   | 1.874342                                                                                                                                                                                                                                                                                                                                                                                                                                                                                                                                                                                                                                                                                                                                                                                                                                                                                                                                                                                                                                                                                                                                                                                                                                                                                                                                                                                                                                                                                             | 0.000000 |          |          |          |   |   |     |          |  |  |  |  |     |          |          |  |  |  |      |          |          |          |  |  |      |          |          |          |          |  |     |          |          |          |          |          |     |          |          |          |          |          |     |          |          |          |          |          |     |          |          |          |          |          |     |          |          |          |          |          |  |   |   |   |   |  |     |          |  |  |  |  |     |          |          |  |  |  |     |          |          |          |  |  |     |          |          |          |          |  |
| 8 B                                                                                                                                   | 2.683595                                                                                                                                                                                                                                                                                                                                                                                                                                                                                                                                                                                                                                                                                                                                                                                                                                                                                                                                                                                                                                                                                                                                                                                                                                                                                                                                                                                                                                                                                             | 1.948485 | 0.000000 |          |          |   |   |     |          |  |  |  |  |     |          |          |  |  |  |      |          |          |          |  |  |      |          |          |          |          |  |     |          |          |          |          |          |     |          |          |          |          |          |     |          |          |          |          |          |     |          |          |          |          |          |     |          |          |          |          |          |  |   |   |   |   |  |     |          |  |  |  |  |     |          |          |  |  |  |     |          |          |          |  |  |     |          |          |          |          |  |
| 9 N                                                                                                                                   | 2.570978                                                                                                                                                                                                                                                                                                                                                                                                                                                                                                                                                                                                                                                                                                                                                                                                                                                                                                                                                                                                                                                                                                                                                                                                                                                                                                                                                                                                                                                                                             | 1.440912 | 1.497959 | 0.000000 |          |   |   |     |          |  |  |  |  |     |          |          |  |  |  |      |          |          |          |  |  |      |          |          |          |          |  |     |          |          |          |          |          |     |          |          |          |          |          |     |          |          |          |          |          |     |          |          |          |          |          |     |          |          |          |          |          |  |   |   |   |   |  |     |          |  |  |  |  |     |          |          |  |  |  |     |          |          |          |  |  |     |          |          |          |          |  |
|  <p>8. -1809.745569 +20.4 H/L 1.9 C<sub>1</sub></p> | <table border="1"> <thead> <tr> <th></th> <th>1</th> <th>2</th> <th>3</th> <th>4</th> <th>5</th> </tr> </thead> <tbody> <tr><td>1 B</td><td>0.000000</td><td></td><td></td><td></td><td></td></tr> <tr><td>2 B</td><td>1.738832</td><td>0.000000</td><td></td><td></td><td></td></tr> <tr><td>3 B</td><td>2.642734</td><td>2.370110</td><td>0.000000</td><td></td><td></td></tr> <tr><td>4 Co</td><td>3.310397</td><td>2.135262</td><td>1.916925</td><td>0.000000</td><td></td></tr> <tr><td>5 B</td><td>1.834458</td><td>1.787747</td><td>2.189274</td><td>2.044877</td><td>0.000000</td></tr> <tr><td>6 B</td><td>2.946081</td><td>1.739430</td><td>1.791907</td><td>1.896539</td><td>2.828231</td></tr> <tr><td>7 B</td><td>1.777600</td><td>1.822589</td><td>1.825360</td><td>2.978254</td><td>2.649602</td></tr> <tr><td>8 N</td><td>1.592948</td><td>2.696305</td><td>2.319476</td><td>3.231572</td><td>1.550234</td></tr> <tr><td>9 B</td><td>1.854861</td><td>2.850097</td><td>1.863734</td><td>3.478901</td><td>2.500734</td></tr> <tr> <th></th> <th>6</th> <th>7</th> <th>8</th> <th>9</th> <th></th> </tr> <tr><td>6 B</td><td>0.000000</td><td></td><td></td><td></td><td></td></tr> <tr><td>7 B</td><td>1.738926</td><td>0.000000</td><td></td><td></td><td></td></tr> <tr><td>8 N</td><td>3.496857</td><td>2.547003</td><td>0.000000</td><td></td><td></td></tr> <tr><td>9 B</td><td>3.041024</td><td>1.715695</td><td>1.461636</td><td>0.000000</td><td></td></tr> </tbody> </table> |          | 1        | 2        | 3        | 4 | 5 | 1 B | 0.000000 |  |  |  |  | 2 B | 1.738832 | 0.000000 |  |  |  | 3 B  | 2.642734 | 2.370110 | 0.000000 |  |  | 4 Co | 3.310397 | 2.135262 | 1.916925 | 0.000000 |  | 5 B | 1.834458 | 1.787747 | 2.189274 | 2.044877 | 0.000000 | 6 B | 2.946081 | 1.739430 | 1.791907 | 1.896539 | 2.828231 | 7 B | 1.777600 | 1.822589 | 1.825360 | 2.978254 | 2.649602 | 8 N | 1.592948 | 2.696305 | 2.319476 | 3.231572 | 1.550234 | 9 B | 1.854861 | 2.850097 | 1.863734 | 3.478901 | 2.500734 |  | 6 | 7 | 8 | 9 |  | 6 B | 0.000000 |  |  |  |  | 7 B | 1.738926 | 0.000000 |  |  |  | 8 N | 3.496857 | 2.547003 | 0.000000 |  |  | 9 B | 3.041024 | 1.715695 | 1.461636 | 0.000000 |  |
|                                                                                                                                       | 1                                                                                                                                                                                                                                                                                                                                                                                                                                                                                                                                                                                                                                                                                                                                                                                                                                                                                                                                                                                                                                                                                                                                                                                                                                                                                                                                                                                                                                                                                                    | 2        | 3        | 4        | 5        |   |   |     |          |  |  |  |  |     |          |          |  |  |  |      |          |          |          |  |  |      |          |          |          |          |  |     |          |          |          |          |          |     |          |          |          |          |          |     |          |          |          |          |          |     |          |          |          |          |          |     |          |          |          |          |          |  |   |   |   |   |  |     |          |  |  |  |  |     |          |          |  |  |  |     |          |          |          |  |  |     |          |          |          |          |  |
| 1 B                                                                                                                                   | 0.000000                                                                                                                                                                                                                                                                                                                                                                                                                                                                                                                                                                                                                                                                                                                                                                                                                                                                                                                                                                                                                                                                                                                                                                                                                                                                                                                                                                                                                                                                                             |          |          |          |          |   |   |     |          |  |  |  |  |     |          |          |  |  |  |      |          |          |          |  |  |      |          |          |          |          |  |     |          |          |          |          |          |     |          |          |          |          |          |     |          |          |          |          |          |     |          |          |          |          |          |     |          |          |          |          |          |  |   |   |   |   |  |     |          |  |  |  |  |     |          |          |  |  |  |     |          |          |          |  |  |     |          |          |          |          |  |
| 2 B                                                                                                                                   | 1.738832                                                                                                                                                                                                                                                                                                                                                                                                                                                                                                                                                                                                                                                                                                                                                                                                                                                                                                                                                                                                                                                                                                                                                                                                                                                                                                                                                                                                                                                                                             | 0.000000 |          |          |          |   |   |     |          |  |  |  |  |     |          |          |  |  |  |      |          |          |          |  |  |      |          |          |          |          |  |     |          |          |          |          |          |     |          |          |          |          |          |     |          |          |          |          |          |     |          |          |          |          |          |     |          |          |          |          |          |  |   |   |   |   |  |     |          |  |  |  |  |     |          |          |  |  |  |     |          |          |          |  |  |     |          |          |          |          |  |
| 3 B                                                                                                                                   | 2.642734                                                                                                                                                                                                                                                                                                                                                                                                                                                                                                                                                                                                                                                                                                                                                                                                                                                                                                                                                                                                                                                                                                                                                                                                                                                                                                                                                                                                                                                                                             | 2.370110 | 0.000000 |          |          |   |   |     |          |  |  |  |  |     |          |          |  |  |  |      |          |          |          |  |  |      |          |          |          |          |  |     |          |          |          |          |          |     |          |          |          |          |          |     |          |          |          |          |          |     |          |          |          |          |          |     |          |          |          |          |          |  |   |   |   |   |  |     |          |  |  |  |  |     |          |          |  |  |  |     |          |          |          |  |  |     |          |          |          |          |  |
| 4 Co                                                                                                                                  | 3.310397                                                                                                                                                                                                                                                                                                                                                                                                                                                                                                                                                                                                                                                                                                                                                                                                                                                                                                                                                                                                                                                                                                                                                                                                                                                                                                                                                                                                                                                                                             | 2.135262 | 1.916925 | 0.000000 |          |   |   |     |          |  |  |  |  |     |          |          |  |  |  |      |          |          |          |  |  |      |          |          |          |          |  |     |          |          |          |          |          |     |          |          |          |          |          |     |          |          |          |          |          |     |          |          |          |          |          |     |          |          |          |          |          |  |   |   |   |   |  |     |          |  |  |  |  |     |          |          |  |  |  |     |          |          |          |  |  |     |          |          |          |          |  |
| 5 B                                                                                                                                   | 1.834458                                                                                                                                                                                                                                                                                                                                                                                                                                                                                                                                                                                                                                                                                                                                                                                                                                                                                                                                                                                                                                                                                                                                                                                                                                                                                                                                                                                                                                                                                             | 1.787747 | 2.189274 | 2.044877 | 0.000000 |   |   |     |          |  |  |  |  |     |          |          |  |  |  |      |          |          |          |  |  |      |          |          |          |          |  |     |          |          |          |          |          |     |          |          |          |          |          |     |          |          |          |          |          |     |          |          |          |          |          |     |          |          |          |          |          |  |   |   |   |   |  |     |          |  |  |  |  |     |          |          |  |  |  |     |          |          |          |  |  |     |          |          |          |          |  |
| 6 B                                                                                                                                   | 2.946081                                                                                                                                                                                                                                                                                                                                                                                                                                                                                                                                                                                                                                                                                                                                                                                                                                                                                                                                                                                                                                                                                                                                                                                                                                                                                                                                                                                                                                                                                             | 1.739430 | 1.791907 | 1.896539 | 2.828231 |   |   |     |          |  |  |  |  |     |          |          |  |  |  |      |          |          |          |  |  |      |          |          |          |          |  |     |          |          |          |          |          |     |          |          |          |          |          |     |          |          |          |          |          |     |          |          |          |          |          |     |          |          |          |          |          |  |   |   |   |   |  |     |          |  |  |  |  |     |          |          |  |  |  |     |          |          |          |  |  |     |          |          |          |          |  |
| 7 B                                                                                                                                   | 1.777600                                                                                                                                                                                                                                                                                                                                                                                                                                                                                                                                                                                                                                                                                                                                                                                                                                                                                                                                                                                                                                                                                                                                                                                                                                                                                                                                                                                                                                                                                             | 1.822589 | 1.825360 | 2.978254 | 2.649602 |   |   |     |          |  |  |  |  |     |          |          |  |  |  |      |          |          |          |  |  |      |          |          |          |          |  |     |          |          |          |          |          |     |          |          |          |          |          |     |          |          |          |          |          |     |          |          |          |          |          |     |          |          |          |          |          |  |   |   |   |   |  |     |          |  |  |  |  |     |          |          |  |  |  |     |          |          |          |  |  |     |          |          |          |          |  |
| 8 N                                                                                                                                   | 1.592948                                                                                                                                                                                                                                                                                                                                                                                                                                                                                                                                                                                                                                                                                                                                                                                                                                                                                                                                                                                                                                                                                                                                                                                                                                                                                                                                                                                                                                                                                             | 2.696305 | 2.319476 | 3.231572 | 1.550234 |   |   |     |          |  |  |  |  |     |          |          |  |  |  |      |          |          |          |  |  |      |          |          |          |          |  |     |          |          |          |          |          |     |          |          |          |          |          |     |          |          |          |          |          |     |          |          |          |          |          |     |          |          |          |          |          |  |   |   |   |   |  |     |          |  |  |  |  |     |          |          |  |  |  |     |          |          |          |  |  |     |          |          |          |          |  |
| 9 B                                                                                                                                   | 1.854861                                                                                                                                                                                                                                                                                                                                                                                                                                                                                                                                                                                                                                                                                                                                                                                                                                                                                                                                                                                                                                                                                                                                                                                                                                                                                                                                                                                                                                                                                             | 2.850097 | 1.863734 | 3.478901 | 2.500734 |   |   |     |          |  |  |  |  |     |          |          |  |  |  |      |          |          |          |  |  |      |          |          |          |          |  |     |          |          |          |          |          |     |          |          |          |          |          |     |          |          |          |          |          |     |          |          |          |          |          |     |          |          |          |          |          |  |   |   |   |   |  |     |          |  |  |  |  |     |          |          |  |  |  |     |          |          |          |  |  |     |          |          |          |          |  |
|                                                                                                                                       | 6                                                                                                                                                                                                                                                                                                                                                                                                                                                                                                                                                                                                                                                                                                                                                                                                                                                                                                                                                                                                                                                                                                                                                                                                                                                                                                                                                                                                                                                                                                    | 7        | 8        | 9        |          |   |   |     |          |  |  |  |  |     |          |          |  |  |  |      |          |          |          |  |  |      |          |          |          |          |  |     |          |          |          |          |          |     |          |          |          |          |          |     |          |          |          |          |          |     |          |          |          |          |          |     |          |          |          |          |          |  |   |   |   |   |  |     |          |  |  |  |  |     |          |          |  |  |  |     |          |          |          |  |  |     |          |          |          |          |  |
| 6 B                                                                                                                                   | 0.000000                                                                                                                                                                                                                                                                                                                                                                                                                                                                                                                                                                                                                                                                                                                                                                                                                                                                                                                                                                                                                                                                                                                                                                                                                                                                                                                                                                                                                                                                                             |          |          |          |          |   |   |     |          |  |  |  |  |     |          |          |  |  |  |      |          |          |          |  |  |      |          |          |          |          |  |     |          |          |          |          |          |     |          |          |          |          |          |     |          |          |          |          |          |     |          |          |          |          |          |     |          |          |          |          |          |  |   |   |   |   |  |     |          |  |  |  |  |     |          |          |  |  |  |     |          |          |          |  |  |     |          |          |          |          |  |
| 7 B                                                                                                                                   | 1.738926                                                                                                                                                                                                                                                                                                                                                                                                                                                                                                                                                                                                                                                                                                                                                                                                                                                                                                                                                                                                                                                                                                                                                                                                                                                                                                                                                                                                                                                                                             | 0.000000 |          |          |          |   |   |     |          |  |  |  |  |     |          |          |  |  |  |      |          |          |          |  |  |      |          |          |          |          |  |     |          |          |          |          |          |     |          |          |          |          |          |     |          |          |          |          |          |     |          |          |          |          |          |     |          |          |          |          |          |  |   |   |   |   |  |     |          |  |  |  |  |     |          |          |  |  |  |     |          |          |          |  |  |     |          |          |          |          |  |
| 8 N                                                                                                                                   | 3.496857                                                                                                                                                                                                                                                                                                                                                                                                                                                                                                                                                                                                                                                                                                                                                                                                                                                                                                                                                                                                                                                                                                                                                                                                                                                                                                                                                                                                                                                                                             | 2.547003 | 0.000000 |          |          |   |   |     |          |  |  |  |  |     |          |          |  |  |  |      |          |          |          |  |  |      |          |          |          |          |  |     |          |          |          |          |          |     |          |          |          |          |          |     |          |          |          |          |          |     |          |          |          |          |          |     |          |          |          |          |          |  |   |   |   |   |  |     |          |  |  |  |  |     |          |          |  |  |  |     |          |          |          |  |  |     |          |          |          |          |  |
| 9 B                                                                                                                                   | 3.041024                                                                                                                                                                                                                                                                                                                                                                                                                                                                                                                                                                                                                                                                                                                                                                                                                                                                                                                                                                                                                                                                                                                                                                                                                                                                                                                                                                                                                                                                                             | 1.715695 | 1.461636 | 0.000000 |          |   |   |     |          |  |  |  |  |     |          |          |  |  |  |      |          |          |          |  |  |      |          |          |          |          |  |     |          |          |          |          |          |     |          |          |          |          |          |     |          |          |          |          |          |     |          |          |          |          |          |     |          |          |          |          |          |  |   |   |   |   |  |     |          |  |  |  |  |     |          |          |  |  |  |     |          |          |          |  |  |     |          |          |          |          |  |

Table S2C. Energy ranking for all of the CpCoNHB<sub>7</sub>H<sub>7</sub> optimized structures:

| No | Initial structure        | Final energy (a.u.) | $\Delta E$ ( kcal/mol) |
|----|--------------------------|---------------------|------------------------|
| 1  | CapCube-Co3-b            | -1809.6156676       | 0.00                   |
| 2  | TI99-Co1-b               | -1809.6156661       | 0.00                   |
| 3  | CapCube-Co2-c            | -1809.6156635       | 0.00                   |
| 4  | TI99-Co2-b               | -1809.6156634       | 0.00                   |
| 5  | TrTrPr-Co2-b             | -1809.6156614       | 0.00                   |
| 6  | TI99-Co3-h               | -1809.6156509       | 0.01                   |
| 7  | TI99-Co2-a_r-44          | -1809.6156499       | 0.01                   |
| 8  | PressCapCube-Co2-c       | -1809.6156480       | 0.01                   |
| 9  | TI99-Co2-a_i-44          | -1809.6144250       | 0.78                   |
| 10 | PressCapCube-Co1-a_r-352 | -1809.6120369       | 2.28                   |
| 11 | TI99-Co2-e               | -1809.6120362       | 2.28                   |
| 12 | TrTrPr-Co2-a             | -1809.6120359       | 2.28                   |
| 13 | TI99-Co4-b               | -1809.6120356       | 2.28                   |
| 14 | TI99-Co3-c               | -1809.6120353       | 2.28                   |
| 15 | TI99-Co3-d               | -1809.6120350       | 2.28                   |
| 16 | TI99-Co3-a               | -1809.6120343       | 2.28                   |
| 17 | CapCube-Co3-e            | -1809.6120316       | 2.28                   |
| 18 | TrTrPr-Co2-c             | -1809.5958986       | 12.41                  |
| 19 | PressCapCube-Co2-f       | -1809.5958921       | 12.41                  |
| 20 | TI99-Co3-b               | -1809.5958715       | 12.42                  |
| 21 | TI99-Co4-c_i-77          | -1809.5957878       | 12.47                  |
| 22 | TrTrPr-Co1-b_i-78        | -1809.5957788       | 12.48                  |
| 23 | TI99-Co4-a               | -1809.5957727       | 12.48                  |
| 24 | TI99-Co4-e_r-97          | -1809.5957677       | 12.49                  |
| 25 | TI99-Co3-e               | -1809.5956708       | 12.55                  |
| 26 | TrTrPr-Co1-b_r-78        | -1809.5956690       | 12.55                  |
| 27 | PressCapCube-Co3-a       | -1809.5956631       | 12.55                  |
| 28 | TI99-Co4-c_r-77          | -1809.5956624       | 12.55                  |
| 29 | TrTrPr-Co2-e             | -1809.5956594       | 12.56                  |
| 30 | CapCube-Co3-a            | -1809.5956593       | 12.56                  |
| 31 | PressCapCube-Co2-d       | -1809.5956593       | 12.56                  |
| 32 | TI99-Co1-a               | -1809.5956591       | 12.56                  |
| 33 | CapCube-Co2-a            | -1809.5956583       | 12.56                  |
| 34 | CapCube-Co2-e            | -1809.5956582       | 12.56                  |
| 35 | TI99-Co4-e_i-97          | -1809.5956342       | 12.57                  |
| 36 | PressCapCube-Co2-e       | -1809.5945850       | 13.23                  |
| 37 | CapCube-Co2-f            | -1809.5944998       | 13.28                  |
| 38 | CapCube-Co3-d            | -1809.5920827       | 14.80                  |
| 39 | TI99-Co3-f               | -1809.5912331       | 15.33                  |
| 40 | CapCube-Co2-b            | -1809.5907671       | 15.63                  |
| 41 | TI99-Co2-d               | -1809.5907605       | 15.63                  |

|    |                          |               |       |
|----|--------------------------|---------------|-------|
| 42 | TrTrPr-Co1-c             | -1809.5906371 | 15.71 |
| 43 | TI99-Co4-d               | -1809.5899055 | 16.17 |
| 44 | PressCapCube-Co2-a       | -1809.5887971 | 16.86 |
| 45 | PressCapCube-Co3-d_r-65  | -1809.5887634 | 16.88 |
| 46 | PressCapCube-Co3-f       | -1809.5874013 | 17.74 |
| 47 | CapCube-Co3-f_r-49       | -1809.5874009 | 17.74 |
| 48 | PressCapCube-Co1-b       | -1809.5874009 | 17.74 |
| 49 | TI99-Co3-g               | -1809.5874000 | 17.74 |
| 50 | CapCube-Co1-b            | -1809.5873981 | 17.74 |
| 51 | CapCube-Co2-d            | -1809.5871349 | 17.90 |
| 52 | TI99-Co2-c               | -1809.5871349 | 17.90 |
| 53 | PressCapCube-Co3-d_i-65  | -1809.5857842 | 18.75 |
| 54 | CapCube-Co3-f_i-49       | -1809.5857838 | 18.75 |
| 55 | TrTrPr-Co2-d             | -1809.5804705 | 22.09 |
| 56 | TI99-Co1-c_r-206         | -1809.5804693 | 22.09 |
| 57 | CapCube-Co3-c            | -1809.5757819 | 25.03 |
| 58 | PressCapCube-Co3-b       | -1809.5670794 | 30.49 |
| 59 | PressCapCube-Co1-d       | -1809.5670179 | 30.53 |
| 60 | PressCapCube-Co3-e       | -1809.5580330 | 36.17 |
| 61 | TrTrPr-Co1-a             | -1809.5564064 | 37.19 |
| 62 | CapCube-Co1-a            | -1809.5557844 | 37.58 |
| 63 | PressCapCube-Co3-c_r-57  | -1809.5513529 | 40.36 |
| 64 | PressCapCube-Co3-c_i-57  | -1809.5496516 | 41.43 |
| 65 | PressCapCube-Co2-b       | -1809.5360779 | 49.94 |
| 66 | PressCapCube-Co1-c       | -1809.5322828 | 52.33 |
| 67 | TI99-Co1-c_i-206         | -1809.5170176 | 61.90 |
| 68 | PressCapCube-Co1-a_i-352 | -1809.5009237 | 72.00 |

Table S3A. Initial CpCoNHB<sub>8</sub>H<sub>8</sub> structures, 97 in all.

|                                                                                                                                           |                                                                                                                                            |
|-------------------------------------------------------------------------------------------------------------------------------------------|--------------------------------------------------------------------------------------------------------------------------------------------|
| <p><b>Initial structures</b></p>                                                                                                          | 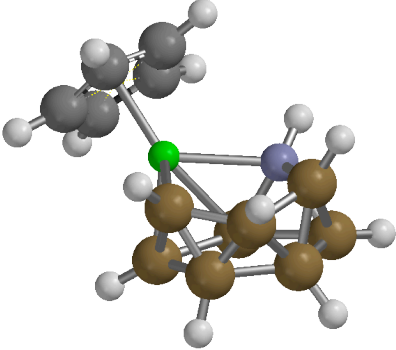 <p>Pentagonal antiprism</p>                             |
|  <p>Bicapped cube</p>                                    |  <p>Bicapped square antiprism</p>                       |
|  <p>Isocloso</p>                                       |  <p>Pentagonal prism</p>                               |
|  <p>Tetracapped trigonal prism <math>C_{2v}</math></p> |  <p>Tetracapped trigonal prism <math>C_{3v}</math></p> |

Table S3B. Distance table for the lowest-lying CpCoNHB<sub>8</sub>H<sub>8</sub> structures after M06L/6-311G(d,p) optimization. Included are the ZPcorrected E (a.u.), relative energy (kcal/mol), HOMO/LUMO gaps (eV) and symmetry.

| 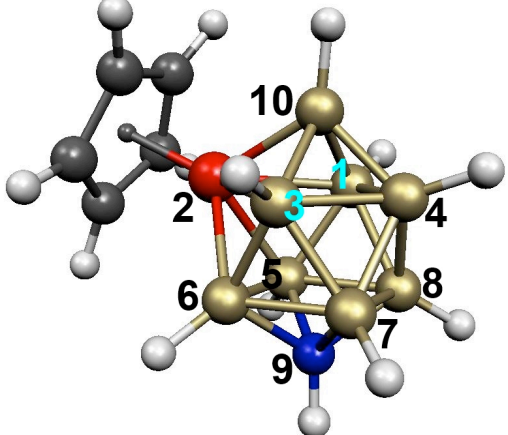 <p><b>1. -1835.277003 0.0 H/L 3.07 C<sub>s</sub></b></p>   | <table border="1"> <thead> <tr> <th></th> <th>1</th> <th>2</th> <th>3</th> <th>4</th> <th>5</th> </tr> </thead> <tbody> <tr><td>1 B</td><td>0.000000</td><td></td><td></td><td></td><td></td></tr> <tr><td>2 Co</td><td>2.117208</td><td>0.000000</td><td></td><td></td><td></td></tr> <tr><td>3 B</td><td>2.601600</td><td>2.117208</td><td>0.000000</td><td></td><td></td></tr> <tr><td>4 B</td><td>1.823917</td><td>2.945390</td><td>1.823917</td><td>0.000000</td><td></td></tr> <tr><td>5 B</td><td>1.746670</td><td>2.017560</td><td>2.849163</td><td>2.811547</td><td>0.000000</td></tr> <tr><td>6 B</td><td>2.849163</td><td>2.017560</td><td>1.746670</td><td>2.811547</td><td>1.947600</td></tr> <tr><td>7 B</td><td>2.805982</td><td>3.170344</td><td>1.751828</td><td>1.762857</td><td>2.637259</td></tr> <tr><td>8 B</td><td>1.751828</td><td>3.170344</td><td>2.805982</td><td>1.762857</td><td>1.832569</td></tr> <tr><td>9 N</td><td>2.663242</td><td>2.974071</td><td>2.663242</td><td>2.669600</td><td>1.589183</td></tr> <tr><td>10 B</td><td>1.736968</td><td>1.959672</td><td>1.736968</td><td>1.696151</td><td>2.931801</td></tr> <tr> <th></th> <th>6</th> <th>7</th> <th>8</th> <th>9</th> <th>10</th> </tr> <tr><td>6 B</td><td>0.000000</td><td></td><td></td><td></td><td></td></tr> <tr><td>7 B</td><td>1.832569</td><td>0.000000</td><td></td><td></td><td></td></tr> <tr><td>8 B</td><td>2.637259</td><td>1.846800</td><td>0.000000</td><td></td><td></td></tr> <tr><td>9 N</td><td>1.589183</td><td>1.577560</td><td>1.577560</td><td>0.000000</td><td></td></tr> <tr><td>10 B</td><td>2.931801</td><td>2.896730</td><td>2.896730</td><td>3.474972</td><td>0.000000</td></tr> </tbody> </table> |          | 1        | 2        | 3        | 4 | 5 | 1 B | 0.000000 |  |  |  |  | 2 Co | 2.117208 | 0.000000 |  |  |  | 3 B | 2.601600 | 2.117208 | 0.000000 |  |  | 4 B | 1.823917 | 2.945390 | 1.823917 | 0.000000 |  | 5 B | 1.746670 | 2.017560 | 2.849163 | 2.811547 | 0.000000 | 6 B | 2.849163 | 2.017560 | 1.746670 | 2.811547 | 1.947600 | 7 B | 2.805982 | 3.170344 | 1.751828 | 1.762857 | 2.637259 | 8 B | 1.751828 | 3.170344 | 2.805982 | 1.762857 | 1.832569 | 9 N | 2.663242 | 2.974071 | 2.663242 | 2.669600 | 1.589183 | 10 B | 1.736968 | 1.959672 | 1.736968 | 1.696151 | 2.931801 |  | 6 | 7 | 8 | 9 | 10 | 6 B | 0.000000 |  |  |  |  | 7 B | 1.832569 | 0.000000 |  |  |  | 8 B | 2.637259 | 1.846800 | 0.000000 |  |  | 9 N | 1.589183 | 1.577560 | 1.577560 | 0.000000 |  | 10 B | 2.931801 | 2.896730 | 2.896730 | 3.474972 | 0.000000 |
|----------------------------------------------------------------------------------------------------------------------------------------------|--------------------------------------------------------------------------------------------------------------------------------------------------------------------------------------------------------------------------------------------------------------------------------------------------------------------------------------------------------------------------------------------------------------------------------------------------------------------------------------------------------------------------------------------------------------------------------------------------------------------------------------------------------------------------------------------------------------------------------------------------------------------------------------------------------------------------------------------------------------------------------------------------------------------------------------------------------------------------------------------------------------------------------------------------------------------------------------------------------------------------------------------------------------------------------------------------------------------------------------------------------------------------------------------------------------------------------------------------------------------------------------------------------------------------------------------------------------------------------------------------------------------------------------------------------------------------------------------------------------------------------------------------------------------------------------------------------------------------------|----------|----------|----------|----------|---|---|-----|----------|--|--|--|--|------|----------|----------|--|--|--|-----|----------|----------|----------|--|--|-----|----------|----------|----------|----------|--|-----|----------|----------|----------|----------|----------|-----|----------|----------|----------|----------|----------|-----|----------|----------|----------|----------|----------|-----|----------|----------|----------|----------|----------|-----|----------|----------|----------|----------|----------|------|----------|----------|----------|----------|----------|--|---|---|---|---|----|-----|----------|--|--|--|--|-----|----------|----------|--|--|--|-----|----------|----------|----------|--|--|-----|----------|----------|----------|----------|--|------|----------|----------|----------|----------|----------|
|                                                                                                                                              | 1                                                                                                                                                                                                                                                                                                                                                                                                                                                                                                                                                                                                                                                                                                                                                                                                                                                                                                                                                                                                                                                                                                                                                                                                                                                                                                                                                                                                                                                                                                                                                                                                                                                                                                                              | 2        | 3        | 4        | 5        |   |   |     |          |  |  |  |  |      |          |          |  |  |  |     |          |          |          |  |  |     |          |          |          |          |  |     |          |          |          |          |          |     |          |          |          |          |          |     |          |          |          |          |          |     |          |          |          |          |          |     |          |          |          |          |          |      |          |          |          |          |          |  |   |   |   |   |    |     |          |  |  |  |  |     |          |          |  |  |  |     |          |          |          |  |  |     |          |          |          |          |  |      |          |          |          |          |          |
| 1 B                                                                                                                                          | 0.000000                                                                                                                                                                                                                                                                                                                                                                                                                                                                                                                                                                                                                                                                                                                                                                                                                                                                                                                                                                                                                                                                                                                                                                                                                                                                                                                                                                                                                                                                                                                                                                                                                                                                                                                       |          |          |          |          |   |   |     |          |  |  |  |  |      |          |          |  |  |  |     |          |          |          |  |  |     |          |          |          |          |  |     |          |          |          |          |          |     |          |          |          |          |          |     |          |          |          |          |          |     |          |          |          |          |          |     |          |          |          |          |          |      |          |          |          |          |          |  |   |   |   |   |    |     |          |  |  |  |  |     |          |          |  |  |  |     |          |          |          |  |  |     |          |          |          |          |  |      |          |          |          |          |          |
| 2 Co                                                                                                                                         | 2.117208                                                                                                                                                                                                                                                                                                                                                                                                                                                                                                                                                                                                                                                                                                                                                                                                                                                                                                                                                                                                                                                                                                                                                                                                                                                                                                                                                                                                                                                                                                                                                                                                                                                                                                                       | 0.000000 |          |          |          |   |   |     |          |  |  |  |  |      |          |          |  |  |  |     |          |          |          |  |  |     |          |          |          |          |  |     |          |          |          |          |          |     |          |          |          |          |          |     |          |          |          |          |          |     |          |          |          |          |          |     |          |          |          |          |          |      |          |          |          |          |          |  |   |   |   |   |    |     |          |  |  |  |  |     |          |          |  |  |  |     |          |          |          |  |  |     |          |          |          |          |  |      |          |          |          |          |          |
| 3 B                                                                                                                                          | 2.601600                                                                                                                                                                                                                                                                                                                                                                                                                                                                                                                                                                                                                                                                                                                                                                                                                                                                                                                                                                                                                                                                                                                                                                                                                                                                                                                                                                                                                                                                                                                                                                                                                                                                                                                       | 2.117208 | 0.000000 |          |          |   |   |     |          |  |  |  |  |      |          |          |  |  |  |     |          |          |          |  |  |     |          |          |          |          |  |     |          |          |          |          |          |     |          |          |          |          |          |     |          |          |          |          |          |     |          |          |          |          |          |     |          |          |          |          |          |      |          |          |          |          |          |  |   |   |   |   |    |     |          |  |  |  |  |     |          |          |  |  |  |     |          |          |          |  |  |     |          |          |          |          |  |      |          |          |          |          |          |
| 4 B                                                                                                                                          | 1.823917                                                                                                                                                                                                                                                                                                                                                                                                                                                                                                                                                                                                                                                                                                                                                                                                                                                                                                                                                                                                                                                                                                                                                                                                                                                                                                                                                                                                                                                                                                                                                                                                                                                                                                                       | 2.945390 | 1.823917 | 0.000000 |          |   |   |     |          |  |  |  |  |      |          |          |  |  |  |     |          |          |          |  |  |     |          |          |          |          |  |     |          |          |          |          |          |     |          |          |          |          |          |     |          |          |          |          |          |     |          |          |          |          |          |     |          |          |          |          |          |      |          |          |          |          |          |  |   |   |   |   |    |     |          |  |  |  |  |     |          |          |  |  |  |     |          |          |          |  |  |     |          |          |          |          |  |      |          |          |          |          |          |
| 5 B                                                                                                                                          | 1.746670                                                                                                                                                                                                                                                                                                                                                                                                                                                                                                                                                                                                                                                                                                                                                                                                                                                                                                                                                                                                                                                                                                                                                                                                                                                                                                                                                                                                                                                                                                                                                                                                                                                                                                                       | 2.017560 | 2.849163 | 2.811547 | 0.000000 |   |   |     |          |  |  |  |  |      |          |          |  |  |  |     |          |          |          |  |  |     |          |          |          |          |  |     |          |          |          |          |          |     |          |          |          |          |          |     |          |          |          |          |          |     |          |          |          |          |          |     |          |          |          |          |          |      |          |          |          |          |          |  |   |   |   |   |    |     |          |  |  |  |  |     |          |          |  |  |  |     |          |          |          |  |  |     |          |          |          |          |  |      |          |          |          |          |          |
| 6 B                                                                                                                                          | 2.849163                                                                                                                                                                                                                                                                                                                                                                                                                                                                                                                                                                                                                                                                                                                                                                                                                                                                                                                                                                                                                                                                                                                                                                                                                                                                                                                                                                                                                                                                                                                                                                                                                                                                                                                       | 2.017560 | 1.746670 | 2.811547 | 1.947600 |   |   |     |          |  |  |  |  |      |          |          |  |  |  |     |          |          |          |  |  |     |          |          |          |          |  |     |          |          |          |          |          |     |          |          |          |          |          |     |          |          |          |          |          |     |          |          |          |          |          |     |          |          |          |          |          |      |          |          |          |          |          |  |   |   |   |   |    |     |          |  |  |  |  |     |          |          |  |  |  |     |          |          |          |  |  |     |          |          |          |          |  |      |          |          |          |          |          |
| 7 B                                                                                                                                          | 2.805982                                                                                                                                                                                                                                                                                                                                                                                                                                                                                                                                                                                                                                                                                                                                                                                                                                                                                                                                                                                                                                                                                                                                                                                                                                                                                                                                                                                                                                                                                                                                                                                                                                                                                                                       | 3.170344 | 1.751828 | 1.762857 | 2.637259 |   |   |     |          |  |  |  |  |      |          |          |  |  |  |     |          |          |          |  |  |     |          |          |          |          |  |     |          |          |          |          |          |     |          |          |          |          |          |     |          |          |          |          |          |     |          |          |          |          |          |     |          |          |          |          |          |      |          |          |          |          |          |  |   |   |   |   |    |     |          |  |  |  |  |     |          |          |  |  |  |     |          |          |          |  |  |     |          |          |          |          |  |      |          |          |          |          |          |
| 8 B                                                                                                                                          | 1.751828                                                                                                                                                                                                                                                                                                                                                                                                                                                                                                                                                                                                                                                                                                                                                                                                                                                                                                                                                                                                                                                                                                                                                                                                                                                                                                                                                                                                                                                                                                                                                                                                                                                                                                                       | 3.170344 | 2.805982 | 1.762857 | 1.832569 |   |   |     |          |  |  |  |  |      |          |          |  |  |  |     |          |          |          |  |  |     |          |          |          |          |  |     |          |          |          |          |          |     |          |          |          |          |          |     |          |          |          |          |          |     |          |          |          |          |          |     |          |          |          |          |          |      |          |          |          |          |          |  |   |   |   |   |    |     |          |  |  |  |  |     |          |          |  |  |  |     |          |          |          |  |  |     |          |          |          |          |  |      |          |          |          |          |          |
| 9 N                                                                                                                                          | 2.663242                                                                                                                                                                                                                                                                                                                                                                                                                                                                                                                                                                                                                                                                                                                                                                                                                                                                                                                                                                                                                                                                                                                                                                                                                                                                                                                                                                                                                                                                                                                                                                                                                                                                                                                       | 2.974071 | 2.663242 | 2.669600 | 1.589183 |   |   |     |          |  |  |  |  |      |          |          |  |  |  |     |          |          |          |  |  |     |          |          |          |          |  |     |          |          |          |          |          |     |          |          |          |          |          |     |          |          |          |          |          |     |          |          |          |          |          |     |          |          |          |          |          |      |          |          |          |          |          |  |   |   |   |   |    |     |          |  |  |  |  |     |          |          |  |  |  |     |          |          |          |  |  |     |          |          |          |          |  |      |          |          |          |          |          |
| 10 B                                                                                                                                         | 1.736968                                                                                                                                                                                                                                                                                                                                                                                                                                                                                                                                                                                                                                                                                                                                                                                                                                                                                                                                                                                                                                                                                                                                                                                                                                                                                                                                                                                                                                                                                                                                                                                                                                                                                                                       | 1.959672 | 1.736968 | 1.696151 | 2.931801 |   |   |     |          |  |  |  |  |      |          |          |  |  |  |     |          |          |          |  |  |     |          |          |          |          |  |     |          |          |          |          |          |     |          |          |          |          |          |     |          |          |          |          |          |     |          |          |          |          |          |     |          |          |          |          |          |      |          |          |          |          |          |  |   |   |   |   |    |     |          |  |  |  |  |     |          |          |  |  |  |     |          |          |          |  |  |     |          |          |          |          |  |      |          |          |          |          |          |
|                                                                                                                                              | 6                                                                                                                                                                                                                                                                                                                                                                                                                                                                                                                                                                                                                                                                                                                                                                                                                                                                                                                                                                                                                                                                                                                                                                                                                                                                                                                                                                                                                                                                                                                                                                                                                                                                                                                              | 7        | 8        | 9        | 10       |   |   |     |          |  |  |  |  |      |          |          |  |  |  |     |          |          |          |  |  |     |          |          |          |          |  |     |          |          |          |          |          |     |          |          |          |          |          |     |          |          |          |          |          |     |          |          |          |          |          |     |          |          |          |          |          |      |          |          |          |          |          |  |   |   |   |   |    |     |          |  |  |  |  |     |          |          |  |  |  |     |          |          |          |  |  |     |          |          |          |          |  |      |          |          |          |          |          |
| 6 B                                                                                                                                          | 0.000000                                                                                                                                                                                                                                                                                                                                                                                                                                                                                                                                                                                                                                                                                                                                                                                                                                                                                                                                                                                                                                                                                                                                                                                                                                                                                                                                                                                                                                                                                                                                                                                                                                                                                                                       |          |          |          |          |   |   |     |          |  |  |  |  |      |          |          |  |  |  |     |          |          |          |  |  |     |          |          |          |          |  |     |          |          |          |          |          |     |          |          |          |          |          |     |          |          |          |          |          |     |          |          |          |          |          |     |          |          |          |          |          |      |          |          |          |          |          |  |   |   |   |   |    |     |          |  |  |  |  |     |          |          |  |  |  |     |          |          |          |  |  |     |          |          |          |          |  |      |          |          |          |          |          |
| 7 B                                                                                                                                          | 1.832569                                                                                                                                                                                                                                                                                                                                                                                                                                                                                                                                                                                                                                                                                                                                                                                                                                                                                                                                                                                                                                                                                                                                                                                                                                                                                                                                                                                                                                                                                                                                                                                                                                                                                                                       | 0.000000 |          |          |          |   |   |     |          |  |  |  |  |      |          |          |  |  |  |     |          |          |          |  |  |     |          |          |          |          |  |     |          |          |          |          |          |     |          |          |          |          |          |     |          |          |          |          |          |     |          |          |          |          |          |     |          |          |          |          |          |      |          |          |          |          |          |  |   |   |   |   |    |     |          |  |  |  |  |     |          |          |  |  |  |     |          |          |          |  |  |     |          |          |          |          |  |      |          |          |          |          |          |
| 8 B                                                                                                                                          | 2.637259                                                                                                                                                                                                                                                                                                                                                                                                                                                                                                                                                                                                                                                                                                                                                                                                                                                                                                                                                                                                                                                                                                                                                                                                                                                                                                                                                                                                                                                                                                                                                                                                                                                                                                                       | 1.846800 | 0.000000 |          |          |   |   |     |          |  |  |  |  |      |          |          |  |  |  |     |          |          |          |  |  |     |          |          |          |          |  |     |          |          |          |          |          |     |          |          |          |          |          |     |          |          |          |          |          |     |          |          |          |          |          |     |          |          |          |          |          |      |          |          |          |          |          |  |   |   |   |   |    |     |          |  |  |  |  |     |          |          |  |  |  |     |          |          |          |  |  |     |          |          |          |          |  |      |          |          |          |          |          |
| 9 N                                                                                                                                          | 1.589183                                                                                                                                                                                                                                                                                                                                                                                                                                                                                                                                                                                                                                                                                                                                                                                                                                                                                                                                                                                                                                                                                                                                                                                                                                                                                                                                                                                                                                                                                                                                                                                                                                                                                                                       | 1.577560 | 1.577560 | 0.000000 |          |   |   |     |          |  |  |  |  |      |          |          |  |  |  |     |          |          |          |  |  |     |          |          |          |          |  |     |          |          |          |          |          |     |          |          |          |          |          |     |          |          |          |          |          |     |          |          |          |          |          |     |          |          |          |          |          |      |          |          |          |          |          |  |   |   |   |   |    |     |          |  |  |  |  |     |          |          |  |  |  |     |          |          |          |  |  |     |          |          |          |          |  |      |          |          |          |          |          |
| 10 B                                                                                                                                         | 2.931801                                                                                                                                                                                                                                                                                                                                                                                                                                                                                                                                                                                                                                                                                                                                                                                                                                                                                                                                                                                                                                                                                                                                                                                                                                                                                                                                                                                                                                                                                                                                                                                                                                                                                                                       | 2.896730 | 2.896730 | 3.474972 | 0.000000 |   |   |     |          |  |  |  |  |      |          |          |  |  |  |     |          |          |          |  |  |     |          |          |          |          |  |     |          |          |          |          |          |     |          |          |          |          |          |     |          |          |          |          |          |     |          |          |          |          |          |     |          |          |          |          |          |      |          |          |          |          |          |  |   |   |   |   |    |     |          |  |  |  |  |     |          |          |  |  |  |     |          |          |          |  |  |     |          |          |          |          |  |      |          |          |          |          |          |
|  <p><b>2. -1835.265024 +7.5 H/L 2.54 C<sub>s</sub></b></p> | <table border="1"> <thead> <tr> <th></th> <th>1</th> <th>2</th> <th>3</th> <th>4</th> <th>5</th> </tr> </thead> <tbody> <tr><td>1 B</td><td>0.000000</td><td></td><td></td><td></td><td></td></tr> <tr><td>2 Co</td><td>2.128232</td><td>0.000000</td><td></td><td></td><td></td></tr> <tr><td>3 B</td><td>2.562400</td><td>2.128232</td><td>0.000000</td><td></td><td></td></tr> <tr><td>4 B</td><td>1.857835</td><td>3.042327</td><td>1.857835</td><td>0.000000</td><td></td></tr> <tr><td>5 B</td><td>1.812605</td><td>2.093789</td><td>2.816324</td><td>2.842213</td><td>0.000000</td></tr> <tr><td>6 B</td><td>2.816324</td><td>2.093789</td><td>1.812605</td><td>2.842213</td><td>1.813200</td></tr> <tr><td>7 B</td><td>2.796944</td><td>3.230088</td><td>1.778026</td><td>1.743407</td><td>2.580265</td></tr> <tr><td>8 B</td><td>1.778026</td><td>3.230088</td><td>2.796944</td><td>1.743407</td><td>1.832810</td></tr> <tr><td>9 B</td><td>2.902712</td><td>3.290949</td><td>2.902712</td><td>2.870661</td><td>1.700816</td></tr> <tr><td>10 N</td><td>1.565663</td><td>1.902040</td><td>1.565663</td><td>1.577282</td><td>2.766426</td></tr> <tr> <th></th> <th>6</th> <th>7</th> <th>8</th> <th>9</th> <th>10</th> </tr> <tr><td>6 B</td><td>0.000000</td><td></td><td></td><td></td><td></td></tr> <tr><td>7 B</td><td>1.832810</td><td>0.000000</td><td></td><td></td><td></td></tr> <tr><td>8 B</td><td>2.580265</td><td>1.819200</td><td>0.000000</td><td></td><td></td></tr> <tr><td>9 B</td><td>1.700816</td><td>1.698748</td><td>1.698748</td><td>0.000000</td><td></td></tr> <tr><td>10 N</td><td>2.766426</td><td>2.674536</td><td>2.674536</td><td>3.500876</td><td>0.000000</td></tr> </tbody> </table> |          | 1        | 2        | 3        | 4 | 5 | 1 B | 0.000000 |  |  |  |  | 2 Co | 2.128232 | 0.000000 |  |  |  | 3 B | 2.562400 | 2.128232 | 0.000000 |  |  | 4 B | 1.857835 | 3.042327 | 1.857835 | 0.000000 |  | 5 B | 1.812605 | 2.093789 | 2.816324 | 2.842213 | 0.000000 | 6 B | 2.816324 | 2.093789 | 1.812605 | 2.842213 | 1.813200 | 7 B | 2.796944 | 3.230088 | 1.778026 | 1.743407 | 2.580265 | 8 B | 1.778026 | 3.230088 | 2.796944 | 1.743407 | 1.832810 | 9 B | 2.902712 | 3.290949 | 2.902712 | 2.870661 | 1.700816 | 10 N | 1.565663 | 1.902040 | 1.565663 | 1.577282 | 2.766426 |  | 6 | 7 | 8 | 9 | 10 | 6 B | 0.000000 |  |  |  |  | 7 B | 1.832810 | 0.000000 |  |  |  | 8 B | 2.580265 | 1.819200 | 0.000000 |  |  | 9 B | 1.700816 | 1.698748 | 1.698748 | 0.000000 |  | 10 N | 2.766426 | 2.674536 | 2.674536 | 3.500876 | 0.000000 |
|                                                                                                                                              | 1                                                                                                                                                                                                                                                                                                                                                                                                                                                                                                                                                                                                                                                                                                                                                                                                                                                                                                                                                                                                                                                                                                                                                                                                                                                                                                                                                                                                                                                                                                                                                                                                                                                                                                                              | 2        | 3        | 4        | 5        |   |   |     |          |  |  |  |  |      |          |          |  |  |  |     |          |          |          |  |  |     |          |          |          |          |  |     |          |          |          |          |          |     |          |          |          |          |          |     |          |          |          |          |          |     |          |          |          |          |          |     |          |          |          |          |          |      |          |          |          |          |          |  |   |   |   |   |    |     |          |  |  |  |  |     |          |          |  |  |  |     |          |          |          |  |  |     |          |          |          |          |  |      |          |          |          |          |          |
| 1 B                                                                                                                                          | 0.000000                                                                                                                                                                                                                                                                                                                                                                                                                                                                                                                                                                                                                                                                                                                                                                                                                                                                                                                                                                                                                                                                                                                                                                                                                                                                                                                                                                                                                                                                                                                                                                                                                                                                                                                       |          |          |          |          |   |   |     |          |  |  |  |  |      |          |          |  |  |  |     |          |          |          |  |  |     |          |          |          |          |  |     |          |          |          |          |          |     |          |          |          |          |          |     |          |          |          |          |          |     |          |          |          |          |          |     |          |          |          |          |          |      |          |          |          |          |          |  |   |   |   |   |    |     |          |  |  |  |  |     |          |          |  |  |  |     |          |          |          |  |  |     |          |          |          |          |  |      |          |          |          |          |          |
| 2 Co                                                                                                                                         | 2.128232                                                                                                                                                                                                                                                                                                                                                                                                                                                                                                                                                                                                                                                                                                                                                                                                                                                                                                                                                                                                                                                                                                                                                                                                                                                                                                                                                                                                                                                                                                                                                                                                                                                                                                                       | 0.000000 |          |          |          |   |   |     |          |  |  |  |  |      |          |          |  |  |  |     |          |          |          |  |  |     |          |          |          |          |  |     |          |          |          |          |          |     |          |          |          |          |          |     |          |          |          |          |          |     |          |          |          |          |          |     |          |          |          |          |          |      |          |          |          |          |          |  |   |   |   |   |    |     |          |  |  |  |  |     |          |          |  |  |  |     |          |          |          |  |  |     |          |          |          |          |  |      |          |          |          |          |          |
| 3 B                                                                                                                                          | 2.562400                                                                                                                                                                                                                                                                                                                                                                                                                                                                                                                                                                                                                                                                                                                                                                                                                                                                                                                                                                                                                                                                                                                                                                                                                                                                                                                                                                                                                                                                                                                                                                                                                                                                                                                       | 2.128232 | 0.000000 |          |          |   |   |     |          |  |  |  |  |      |          |          |  |  |  |     |          |          |          |  |  |     |          |          |          |          |  |     |          |          |          |          |          |     |          |          |          |          |          |     |          |          |          |          |          |     |          |          |          |          |          |     |          |          |          |          |          |      |          |          |          |          |          |  |   |   |   |   |    |     |          |  |  |  |  |     |          |          |  |  |  |     |          |          |          |  |  |     |          |          |          |          |  |      |          |          |          |          |          |
| 4 B                                                                                                                                          | 1.857835                                                                                                                                                                                                                                                                                                                                                                                                                                                                                                                                                                                                                                                                                                                                                                                                                                                                                                                                                                                                                                                                                                                                                                                                                                                                                                                                                                                                                                                                                                                                                                                                                                                                                                                       | 3.042327 | 1.857835 | 0.000000 |          |   |   |     |          |  |  |  |  |      |          |          |  |  |  |     |          |          |          |  |  |     |          |          |          |          |  |     |          |          |          |          |          |     |          |          |          |          |          |     |          |          |          |          |          |     |          |          |          |          |          |     |          |          |          |          |          |      |          |          |          |          |          |  |   |   |   |   |    |     |          |  |  |  |  |     |          |          |  |  |  |     |          |          |          |  |  |     |          |          |          |          |  |      |          |          |          |          |          |
| 5 B                                                                                                                                          | 1.812605                                                                                                                                                                                                                                                                                                                                                                                                                                                                                                                                                                                                                                                                                                                                                                                                                                                                                                                                                                                                                                                                                                                                                                                                                                                                                                                                                                                                                                                                                                                                                                                                                                                                                                                       | 2.093789 | 2.816324 | 2.842213 | 0.000000 |   |   |     |          |  |  |  |  |      |          |          |  |  |  |     |          |          |          |  |  |     |          |          |          |          |  |     |          |          |          |          |          |     |          |          |          |          |          |     |          |          |          |          |          |     |          |          |          |          |          |     |          |          |          |          |          |      |          |          |          |          |          |  |   |   |   |   |    |     |          |  |  |  |  |     |          |          |  |  |  |     |          |          |          |  |  |     |          |          |          |          |  |      |          |          |          |          |          |
| 6 B                                                                                                                                          | 2.816324                                                                                                                                                                                                                                                                                                                                                                                                                                                                                                                                                                                                                                                                                                                                                                                                                                                                                                                                                                                                                                                                                                                                                                                                                                                                                                                                                                                                                                                                                                                                                                                                                                                                                                                       | 2.093789 | 1.812605 | 2.842213 | 1.813200 |   |   |     |          |  |  |  |  |      |          |          |  |  |  |     |          |          |          |  |  |     |          |          |          |          |  |     |          |          |          |          |          |     |          |          |          |          |          |     |          |          |          |          |          |     |          |          |          |          |          |     |          |          |          |          |          |      |          |          |          |          |          |  |   |   |   |   |    |     |          |  |  |  |  |     |          |          |  |  |  |     |          |          |          |  |  |     |          |          |          |          |  |      |          |          |          |          |          |
| 7 B                                                                                                                                          | 2.796944                                                                                                                                                                                                                                                                                                                                                                                                                                                                                                                                                                                                                                                                                                                                                                                                                                                                                                                                                                                                                                                                                                                                                                                                                                                                                                                                                                                                                                                                                                                                                                                                                                                                                                                       | 3.230088 | 1.778026 | 1.743407 | 2.580265 |   |   |     |          |  |  |  |  |      |          |          |  |  |  |     |          |          |          |  |  |     |          |          |          |          |  |     |          |          |          |          |          |     |          |          |          |          |          |     |          |          |          |          |          |     |          |          |          |          |          |     |          |          |          |          |          |      |          |          |          |          |          |  |   |   |   |   |    |     |          |  |  |  |  |     |          |          |  |  |  |     |          |          |          |  |  |     |          |          |          |          |  |      |          |          |          |          |          |
| 8 B                                                                                                                                          | 1.778026                                                                                                                                                                                                                                                                                                                                                                                                                                                                                                                                                                                                                                                                                                                                                                                                                                                                                                                                                                                                                                                                                                                                                                                                                                                                                                                                                                                                                                                                                                                                                                                                                                                                                                                       | 3.230088 | 2.796944 | 1.743407 | 1.832810 |   |   |     |          |  |  |  |  |      |          |          |  |  |  |     |          |          |          |  |  |     |          |          |          |          |  |     |          |          |          |          |          |     |          |          |          |          |          |     |          |          |          |          |          |     |          |          |          |          |          |     |          |          |          |          |          |      |          |          |          |          |          |  |   |   |   |   |    |     |          |  |  |  |  |     |          |          |  |  |  |     |          |          |          |  |  |     |          |          |          |          |  |      |          |          |          |          |          |
| 9 B                                                                                                                                          | 2.902712                                                                                                                                                                                                                                                                                                                                                                                                                                                                                                                                                                                                                                                                                                                                                                                                                                                                                                                                                                                                                                                                                                                                                                                                                                                                                                                                                                                                                                                                                                                                                                                                                                                                                                                       | 3.290949 | 2.902712 | 2.870661 | 1.700816 |   |   |     |          |  |  |  |  |      |          |          |  |  |  |     |          |          |          |  |  |     |          |          |          |          |  |     |          |          |          |          |          |     |          |          |          |          |          |     |          |          |          |          |          |     |          |          |          |          |          |     |          |          |          |          |          |      |          |          |          |          |          |  |   |   |   |   |    |     |          |  |  |  |  |     |          |          |  |  |  |     |          |          |          |  |  |     |          |          |          |          |  |      |          |          |          |          |          |
| 10 N                                                                                                                                         | 1.565663                                                                                                                                                                                                                                                                                                                                                                                                                                                                                                                                                                                                                                                                                                                                                                                                                                                                                                                                                                                                                                                                                                                                                                                                                                                                                                                                                                                                                                                                                                                                                                                                                                                                                                                       | 1.902040 | 1.565663 | 1.577282 | 2.766426 |   |   |     |          |  |  |  |  |      |          |          |  |  |  |     |          |          |          |  |  |     |          |          |          |          |  |     |          |          |          |          |          |     |          |          |          |          |          |     |          |          |          |          |          |     |          |          |          |          |          |     |          |          |          |          |          |      |          |          |          |          |          |  |   |   |   |   |    |     |          |  |  |  |  |     |          |          |  |  |  |     |          |          |          |  |  |     |          |          |          |          |  |      |          |          |          |          |          |
|                                                                                                                                              | 6                                                                                                                                                                                                                                                                                                                                                                                                                                                                                                                                                                                                                                                                                                                                                                                                                                                                                                                                                                                                                                                                                                                                                                                                                                                                                                                                                                                                                                                                                                                                                                                                                                                                                                                              | 7        | 8        | 9        | 10       |   |   |     |          |  |  |  |  |      |          |          |  |  |  |     |          |          |          |  |  |     |          |          |          |          |  |     |          |          |          |          |          |     |          |          |          |          |          |     |          |          |          |          |          |     |          |          |          |          |          |     |          |          |          |          |          |      |          |          |          |          |          |  |   |   |   |   |    |     |          |  |  |  |  |     |          |          |  |  |  |     |          |          |          |  |  |     |          |          |          |          |  |      |          |          |          |          |          |
| 6 B                                                                                                                                          | 0.000000                                                                                                                                                                                                                                                                                                                                                                                                                                                                                                                                                                                                                                                                                                                                                                                                                                                                                                                                                                                                                                                                                                                                                                                                                                                                                                                                                                                                                                                                                                                                                                                                                                                                                                                       |          |          |          |          |   |   |     |          |  |  |  |  |      |          |          |  |  |  |     |          |          |          |  |  |     |          |          |          |          |  |     |          |          |          |          |          |     |          |          |          |          |          |     |          |          |          |          |          |     |          |          |          |          |          |     |          |          |          |          |          |      |          |          |          |          |          |  |   |   |   |   |    |     |          |  |  |  |  |     |          |          |  |  |  |     |          |          |          |  |  |     |          |          |          |          |  |      |          |          |          |          |          |
| 7 B                                                                                                                                          | 1.832810                                                                                                                                                                                                                                                                                                                                                                                                                                                                                                                                                                                                                                                                                                                                                                                                                                                                                                                                                                                                                                                                                                                                                                                                                                                                                                                                                                                                                                                                                                                                                                                                                                                                                                                       | 0.000000 |          |          |          |   |   |     |          |  |  |  |  |      |          |          |  |  |  |     |          |          |          |  |  |     |          |          |          |          |  |     |          |          |          |          |          |     |          |          |          |          |          |     |          |          |          |          |          |     |          |          |          |          |          |     |          |          |          |          |          |      |          |          |          |          |          |  |   |   |   |   |    |     |          |  |  |  |  |     |          |          |  |  |  |     |          |          |          |  |  |     |          |          |          |          |  |      |          |          |          |          |          |
| 8 B                                                                                                                                          | 2.580265                                                                                                                                                                                                                                                                                                                                                                                                                                                                                                                                                                                                                                                                                                                                                                                                                                                                                                                                                                                                                                                                                                                                                                                                                                                                                                                                                                                                                                                                                                                                                                                                                                                                                                                       | 1.819200 | 0.000000 |          |          |   |   |     |          |  |  |  |  |      |          |          |  |  |  |     |          |          |          |  |  |     |          |          |          |          |  |     |          |          |          |          |          |     |          |          |          |          |          |     |          |          |          |          |          |     |          |          |          |          |          |     |          |          |          |          |          |      |          |          |          |          |          |  |   |   |   |   |    |     |          |  |  |  |  |     |          |          |  |  |  |     |          |          |          |  |  |     |          |          |          |          |  |      |          |          |          |          |          |
| 9 B                                                                                                                                          | 1.700816                                                                                                                                                                                                                                                                                                                                                                                                                                                                                                                                                                                                                                                                                                                                                                                                                                                                                                                                                                                                                                                                                                                                                                                                                                                                                                                                                                                                                                                                                                                                                                                                                                                                                                                       | 1.698748 | 1.698748 | 0.000000 |          |   |   |     |          |  |  |  |  |      |          |          |  |  |  |     |          |          |          |  |  |     |          |          |          |          |  |     |          |          |          |          |          |     |          |          |          |          |          |     |          |          |          |          |          |     |          |          |          |          |          |     |          |          |          |          |          |      |          |          |          |          |          |  |   |   |   |   |    |     |          |  |  |  |  |     |          |          |  |  |  |     |          |          |          |  |  |     |          |          |          |          |  |      |          |          |          |          |          |
| 10 N                                                                                                                                         | 2.766426                                                                                                                                                                                                                                                                                                                                                                                                                                                                                                                                                                                                                                                                                                                                                                                                                                                                                                                                                                                                                                                                                                                                                                                                                                                                                                                                                                                                                                                                                                                                                                                                                                                                                                                       | 2.674536 | 2.674536 | 3.500876 | 0.000000 |   |   |     |          |  |  |  |  |      |          |          |  |  |  |     |          |          |          |  |  |     |          |          |          |          |  |     |          |          |          |          |          |     |          |          |          |          |          |     |          |          |          |          |          |     |          |          |          |          |          |     |          |          |          |          |          |      |          |          |          |          |          |  |   |   |   |   |    |     |          |  |  |  |  |     |          |          |  |  |  |     |          |          |          |  |  |     |          |          |          |          |  |      |          |          |          |          |          |



| 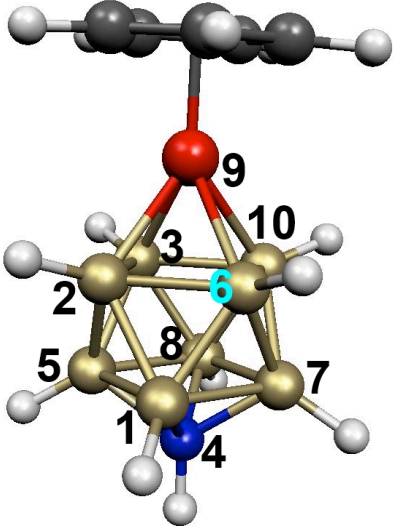 <p>3. -1835.246686 +19.0 H/L 2.25 C<sub>4v</sub>-C<sub>s</sub></p> | <table border="1"> <thead> <tr> <th></th> <th>1</th> <th>2</th> <th>3</th> <th>4</th> <th>5</th> </tr> </thead> <tbody> <tr><td>1 B</td><td>0.000000</td><td></td><td></td><td></td><td></td></tr> <tr><td>2 B</td><td>1.770364</td><td>0.000000</td><td></td><td></td><td></td></tr> <tr><td>3 B</td><td>2.814519</td><td>1.824338</td><td>0.000000</td><td></td><td></td></tr> <tr><td>4 N</td><td>1.575503</td><td>2.670698</td><td>2.672198</td><td>0.000000</td><td></td></tr> <tr><td>5 B</td><td>1.853802</td><td>1.770559</td><td>1.771019</td><td>1.575583</td><td>0.000000</td></tr> <tr><td>6 B</td><td>1.770449</td><td>1.823456</td><td>2.579980</td><td>2.671022</td><td>2.813364</td></tr> <tr><td>7 B</td><td>1.853730</td><td>2.812999</td><td>2.813699</td><td>1.575539</td><td>2.620619</td></tr> <tr><td>8 B</td><td>2.620842</td><td>2.812762</td><td>1.770977</td><td>1.575742</td><td>1.852593</td></tr> <tr><td>9 Co</td><td>3.287339</td><td>2.016630</td><td>2.018580</td><td>3.890544</td><td>3.288286</td></tr> <tr><td>10 B</td><td>2.814426</td><td>2.579664</td><td>1.824267</td><td>2.672022</td><td>2.813680</td></tr> <tr> <th></th> <th>6</th> <th>7</th> <th>8</th> <th>9</th> <th>10</th> </tr> <tr><td>6 B</td><td>0.000000</td><td></td><td></td><td></td><td></td></tr> <tr><td>7 B</td><td>1.770858</td><td>0.000000</td><td></td><td></td><td></td></tr> <tr><td>8 B</td><td>2.813149</td><td>1.852421</td><td>0.000000</td><td></td><td></td></tr> <tr><td>9 Co</td><td>2.016123</td><td>3.287708</td><td>3.288842</td><td>0.000000</td><td></td></tr> <tr><td>10 B</td><td>1.824778</td><td>1.770811</td><td>1.770708</td><td>2.018177</td><td>0.000000</td></tr> </tbody> </table> |          | 1        | 2        | 3        | 4 | 5 | 1 B | 0.000000 |  |  |  |  | 2 B | 1.770364 | 0.000000 |  |  |  | 3 B | 2.814519 | 1.824338 | 0.000000 |  |  | 4 N  | 1.575503 | 2.670698 | 2.672198 | 0.000000 |  | 5 B | 1.853802 | 1.770559 | 1.771019 | 1.575583 | 0.000000 | 6 B | 1.770449 | 1.823456 | 2.579980 | 2.671022 | 2.813364 | 7 B | 1.853730 | 2.812999 | 2.813699 | 1.575539 | 2.620619 | 8 B | 2.620842 | 2.812762 | 1.770977 | 1.575742 | 1.852593 | 9 Co | 3.287339 | 2.016630 | 2.018580 | 3.890544 | 3.288286 | 10 B  | 2.814426 | 2.579664 | 1.824267 | 2.672022 | 2.813680 |  | 6 | 7 | 8 | 9 | 10 | 6 B | 0.000000 |  |  |  |  | 7 B | 1.770858 | 0.000000 |  |  |  | 8 B | 2.813149 | 1.852421 | 0.000000 |  |  | 9 Co | 2.016123 | 3.287708 | 3.288842 | 0.000000 |  | 10 B  | 1.824778 | 1.770811 | 1.770708 | 2.018177 | 0.000000 |
|------------------------------------------------------------------------------------------------------------------------------------------------------|---------------------------------------------------------------------------------------------------------------------------------------------------------------------------------------------------------------------------------------------------------------------------------------------------------------------------------------------------------------------------------------------------------------------------------------------------------------------------------------------------------------------------------------------------------------------------------------------------------------------------------------------------------------------------------------------------------------------------------------------------------------------------------------------------------------------------------------------------------------------------------------------------------------------------------------------------------------------------------------------------------------------------------------------------------------------------------------------------------------------------------------------------------------------------------------------------------------------------------------------------------------------------------------------------------------------------------------------------------------------------------------------------------------------------------------------------------------------------------------------------------------------------------------------------------------------------------------------------------------------------------------------------------------------------------------------------------------------------------|----------|----------|----------|----------|---|---|-----|----------|--|--|--|--|-----|----------|----------|--|--|--|-----|----------|----------|----------|--|--|------|----------|----------|----------|----------|--|-----|----------|----------|----------|----------|----------|-----|----------|----------|----------|----------|----------|-----|----------|----------|----------|----------|----------|-----|----------|----------|----------|----------|----------|------|----------|----------|----------|----------|----------|-------|----------|----------|----------|----------|----------|--|---|---|---|---|----|-----|----------|--|--|--|--|-----|----------|----------|--|--|--|-----|----------|----------|----------|--|--|------|----------|----------|----------|----------|--|-------|----------|----------|----------|----------|----------|
|                                                                                                                                                      | 1                                                                                                                                                                                                                                                                                                                                                                                                                                                                                                                                                                                                                                                                                                                                                                                                                                                                                                                                                                                                                                                                                                                                                                                                                                                                                                                                                                                                                                                                                                                                                                                                                                                                                                                               | 2        | 3        | 4        | 5        |   |   |     |          |  |  |  |  |     |          |          |  |  |  |     |          |          |          |  |  |      |          |          |          |          |  |     |          |          |          |          |          |     |          |          |          |          |          |     |          |          |          |          |          |     |          |          |          |          |          |      |          |          |          |          |          |       |          |          |          |          |          |  |   |   |   |   |    |     |          |  |  |  |  |     |          |          |  |  |  |     |          |          |          |  |  |      |          |          |          |          |  |       |          |          |          |          |          |
| 1 B                                                                                                                                                  | 0.000000                                                                                                                                                                                                                                                                                                                                                                                                                                                                                                                                                                                                                                                                                                                                                                                                                                                                                                                                                                                                                                                                                                                                                                                                                                                                                                                                                                                                                                                                                                                                                                                                                                                                                                                        |          |          |          |          |   |   |     |          |  |  |  |  |     |          |          |  |  |  |     |          |          |          |  |  |      |          |          |          |          |  |     |          |          |          |          |          |     |          |          |          |          |          |     |          |          |          |          |          |     |          |          |          |          |          |      |          |          |          |          |          |       |          |          |          |          |          |  |   |   |   |   |    |     |          |  |  |  |  |     |          |          |  |  |  |     |          |          |          |  |  |      |          |          |          |          |  |       |          |          |          |          |          |
| 2 B                                                                                                                                                  | 1.770364                                                                                                                                                                                                                                                                                                                                                                                                                                                                                                                                                                                                                                                                                                                                                                                                                                                                                                                                                                                                                                                                                                                                                                                                                                                                                                                                                                                                                                                                                                                                                                                                                                                                                                                        | 0.000000 |          |          |          |   |   |     |          |  |  |  |  |     |          |          |  |  |  |     |          |          |          |  |  |      |          |          |          |          |  |     |          |          |          |          |          |     |          |          |          |          |          |     |          |          |          |          |          |     |          |          |          |          |          |      |          |          |          |          |          |       |          |          |          |          |          |  |   |   |   |   |    |     |          |  |  |  |  |     |          |          |  |  |  |     |          |          |          |  |  |      |          |          |          |          |  |       |          |          |          |          |          |
| 3 B                                                                                                                                                  | 2.814519                                                                                                                                                                                                                                                                                                                                                                                                                                                                                                                                                                                                                                                                                                                                                                                                                                                                                                                                                                                                                                                                                                                                                                                                                                                                                                                                                                                                                                                                                                                                                                                                                                                                                                                        | 1.824338 | 0.000000 |          |          |   |   |     |          |  |  |  |  |     |          |          |  |  |  |     |          |          |          |  |  |      |          |          |          |          |  |     |          |          |          |          |          |     |          |          |          |          |          |     |          |          |          |          |          |     |          |          |          |          |          |      |          |          |          |          |          |       |          |          |          |          |          |  |   |   |   |   |    |     |          |  |  |  |  |     |          |          |  |  |  |     |          |          |          |  |  |      |          |          |          |          |  |       |          |          |          |          |          |
| 4 N                                                                                                                                                  | 1.575503                                                                                                                                                                                                                                                                                                                                                                                                                                                                                                                                                                                                                                                                                                                                                                                                                                                                                                                                                                                                                                                                                                                                                                                                                                                                                                                                                                                                                                                                                                                                                                                                                                                                                                                        | 2.670698 | 2.672198 | 0.000000 |          |   |   |     |          |  |  |  |  |     |          |          |  |  |  |     |          |          |          |  |  |      |          |          |          |          |  |     |          |          |          |          |          |     |          |          |          |          |          |     |          |          |          |          |          |     |          |          |          |          |          |      |          |          |          |          |          |       |          |          |          |          |          |  |   |   |   |   |    |     |          |  |  |  |  |     |          |          |  |  |  |     |          |          |          |  |  |      |          |          |          |          |  |       |          |          |          |          |          |
| 5 B                                                                                                                                                  | 1.853802                                                                                                                                                                                                                                                                                                                                                                                                                                                                                                                                                                                                                                                                                                                                                                                                                                                                                                                                                                                                                                                                                                                                                                                                                                                                                                                                                                                                                                                                                                                                                                                                                                                                                                                        | 1.770559 | 1.771019 | 1.575583 | 0.000000 |   |   |     |          |  |  |  |  |     |          |          |  |  |  |     |          |          |          |  |  |      |          |          |          |          |  |     |          |          |          |          |          |     |          |          |          |          |          |     |          |          |          |          |          |     |          |          |          |          |          |      |          |          |          |          |          |       |          |          |          |          |          |  |   |   |   |   |    |     |          |  |  |  |  |     |          |          |  |  |  |     |          |          |          |  |  |      |          |          |          |          |  |       |          |          |          |          |          |
| 6 B                                                                                                                                                  | 1.770449                                                                                                                                                                                                                                                                                                                                                                                                                                                                                                                                                                                                                                                                                                                                                                                                                                                                                                                                                                                                                                                                                                                                                                                                                                                                                                                                                                                                                                                                                                                                                                                                                                                                                                                        | 1.823456 | 2.579980 | 2.671022 | 2.813364 |   |   |     |          |  |  |  |  |     |          |          |  |  |  |     |          |          |          |  |  |      |          |          |          |          |  |     |          |          |          |          |          |     |          |          |          |          |          |     |          |          |          |          |          |     |          |          |          |          |          |      |          |          |          |          |          |       |          |          |          |          |          |  |   |   |   |   |    |     |          |  |  |  |  |     |          |          |  |  |  |     |          |          |          |  |  |      |          |          |          |          |  |       |          |          |          |          |          |
| 7 B                                                                                                                                                  | 1.853730                                                                                                                                                                                                                                                                                                                                                                                                                                                                                                                                                                                                                                                                                                                                                                                                                                                                                                                                                                                                                                                                                                                                                                                                                                                                                                                                                                                                                                                                                                                                                                                                                                                                                                                        | 2.812999 | 2.813699 | 1.575539 | 2.620619 |   |   |     |          |  |  |  |  |     |          |          |  |  |  |     |          |          |          |  |  |      |          |          |          |          |  |     |          |          |          |          |          |     |          |          |          |          |          |     |          |          |          |          |          |     |          |          |          |          |          |      |          |          |          |          |          |       |          |          |          |          |          |  |   |   |   |   |    |     |          |  |  |  |  |     |          |          |  |  |  |     |          |          |          |  |  |      |          |          |          |          |  |       |          |          |          |          |          |
| 8 B                                                                                                                                                  | 2.620842                                                                                                                                                                                                                                                                                                                                                                                                                                                                                                                                                                                                                                                                                                                                                                                                                                                                                                                                                                                                                                                                                                                                                                                                                                                                                                                                                                                                                                                                                                                                                                                                                                                                                                                        | 2.812762 | 1.770977 | 1.575742 | 1.852593 |   |   |     |          |  |  |  |  |     |          |          |  |  |  |     |          |          |          |  |  |      |          |          |          |          |  |     |          |          |          |          |          |     |          |          |          |          |          |     |          |          |          |          |          |     |          |          |          |          |          |      |          |          |          |          |          |       |          |          |          |          |          |  |   |   |   |   |    |     |          |  |  |  |  |     |          |          |  |  |  |     |          |          |          |  |  |      |          |          |          |          |  |       |          |          |          |          |          |
| 9 Co                                                                                                                                                 | 3.287339                                                                                                                                                                                                                                                                                                                                                                                                                                                                                                                                                                                                                                                                                                                                                                                                                                                                                                                                                                                                                                                                                                                                                                                                                                                                                                                                                                                                                                                                                                                                                                                                                                                                                                                        | 2.016630 | 2.018580 | 3.890544 | 3.288286 |   |   |     |          |  |  |  |  |     |          |          |  |  |  |     |          |          |          |  |  |      |          |          |          |          |  |     |          |          |          |          |          |     |          |          |          |          |          |     |          |          |          |          |          |     |          |          |          |          |          |      |          |          |          |          |          |       |          |          |          |          |          |  |   |   |   |   |    |     |          |  |  |  |  |     |          |          |  |  |  |     |          |          |          |  |  |      |          |          |          |          |  |       |          |          |          |          |          |
| 10 B                                                                                                                                                 | 2.814426                                                                                                                                                                                                                                                                                                                                                                                                                                                                                                                                                                                                                                                                                                                                                                                                                                                                                                                                                                                                                                                                                                                                                                                                                                                                                                                                                                                                                                                                                                                                                                                                                                                                                                                        | 2.579664 | 1.824267 | 2.672022 | 2.813680 |   |   |     |          |  |  |  |  |     |          |          |  |  |  |     |          |          |          |  |  |      |          |          |          |          |  |     |          |          |          |          |          |     |          |          |          |          |          |     |          |          |          |          |          |     |          |          |          |          |          |      |          |          |          |          |          |       |          |          |          |          |          |  |   |   |   |   |    |     |          |  |  |  |  |     |          |          |  |  |  |     |          |          |          |  |  |      |          |          |          |          |  |       |          |          |          |          |          |
|                                                                                                                                                      | 6                                                                                                                                                                                                                                                                                                                                                                                                                                                                                                                                                                                                                                                                                                                                                                                                                                                                                                                                                                                                                                                                                                                                                                                                                                                                                                                                                                                                                                                                                                                                                                                                                                                                                                                               | 7        | 8        | 9        | 10       |   |   |     |          |  |  |  |  |     |          |          |  |  |  |     |          |          |          |  |  |      |          |          |          |          |  |     |          |          |          |          |          |     |          |          |          |          |          |     |          |          |          |          |          |     |          |          |          |          |          |      |          |          |          |          |          |       |          |          |          |          |          |  |   |   |   |   |    |     |          |  |  |  |  |     |          |          |  |  |  |     |          |          |          |  |  |      |          |          |          |          |  |       |          |          |          |          |          |
| 6 B                                                                                                                                                  | 0.000000                                                                                                                                                                                                                                                                                                                                                                                                                                                                                                                                                                                                                                                                                                                                                                                                                                                                                                                                                                                                                                                                                                                                                                                                                                                                                                                                                                                                                                                                                                                                                                                                                                                                                                                        |          |          |          |          |   |   |     |          |  |  |  |  |     |          |          |  |  |  |     |          |          |          |  |  |      |          |          |          |          |  |     |          |          |          |          |          |     |          |          |          |          |          |     |          |          |          |          |          |     |          |          |          |          |          |      |          |          |          |          |          |       |          |          |          |          |          |  |   |   |   |   |    |     |          |  |  |  |  |     |          |          |  |  |  |     |          |          |          |  |  |      |          |          |          |          |  |       |          |          |          |          |          |
| 7 B                                                                                                                                                  | 1.770858                                                                                                                                                                                                                                                                                                                                                                                                                                                                                                                                                                                                                                                                                                                                                                                                                                                                                                                                                                                                                                                                                                                                                                                                                                                                                                                                                                                                                                                                                                                                                                                                                                                                                                                        | 0.000000 |          |          |          |   |   |     |          |  |  |  |  |     |          |          |  |  |  |     |          |          |          |  |  |      |          |          |          |          |  |     |          |          |          |          |          |     |          |          |          |          |          |     |          |          |          |          |          |     |          |          |          |          |          |      |          |          |          |          |          |       |          |          |          |          |          |  |   |   |   |   |    |     |          |  |  |  |  |     |          |          |  |  |  |     |          |          |          |  |  |      |          |          |          |          |  |       |          |          |          |          |          |
| 8 B                                                                                                                                                  | 2.813149                                                                                                                                                                                                                                                                                                                                                                                                                                                                                                                                                                                                                                                                                                                                                                                                                                                                                                                                                                                                                                                                                                                                                                                                                                                                                                                                                                                                                                                                                                                                                                                                                                                                                                                        | 1.852421 | 0.000000 |          |          |   |   |     |          |  |  |  |  |     |          |          |  |  |  |     |          |          |          |  |  |      |          |          |          |          |  |     |          |          |          |          |          |     |          |          |          |          |          |     |          |          |          |          |          |     |          |          |          |          |          |      |          |          |          |          |          |       |          |          |          |          |          |  |   |   |   |   |    |     |          |  |  |  |  |     |          |          |  |  |  |     |          |          |          |  |  |      |          |          |          |          |  |       |          |          |          |          |          |
| 9 Co                                                                                                                                                 | 2.016123                                                                                                                                                                                                                                                                                                                                                                                                                                                                                                                                                                                                                                                                                                                                                                                                                                                                                                                                                                                                                                                                                                                                                                                                                                                                                                                                                                                                                                                                                                                                                                                                                                                                                                                        | 3.287708 | 3.288842 | 0.000000 |          |   |   |     |          |  |  |  |  |     |          |          |  |  |  |     |          |          |          |  |  |      |          |          |          |          |  |     |          |          |          |          |          |     |          |          |          |          |          |     |          |          |          |          |          |     |          |          |          |          |          |      |          |          |          |          |          |       |          |          |          |          |          |  |   |   |   |   |    |     |          |  |  |  |  |     |          |          |  |  |  |     |          |          |          |  |  |      |          |          |          |          |  |       |          |          |          |          |          |
| 10 B                                                                                                                                                 | 1.824778                                                                                                                                                                                                                                                                                                                                                                                                                                                                                                                                                                                                                                                                                                                                                                                                                                                                                                                                                                                                                                                                                                                                                                                                                                                                                                                                                                                                                                                                                                                                                                                                                                                                                                                        | 1.770811 | 1.770708 | 2.018177 | 0.000000 |   |   |     |          |  |  |  |  |     |          |          |  |  |  |     |          |          |          |  |  |      |          |          |          |          |  |     |          |          |          |          |          |     |          |          |          |          |          |     |          |          |          |          |          |     |          |          |          |          |          |      |          |          |          |          |          |       |          |          |          |          |          |  |   |   |   |   |    |     |          |  |  |  |  |     |          |          |  |  |  |     |          |          |          |  |  |      |          |          |          |          |  |       |          |          |          |          |          |
|  <p>4. -1835.231596 +28.5 H/L 2.03 C<sub>1</sub></p>               | <table border="1"> <thead> <tr> <th></th> <th>1</th> <th>2</th> <th>3</th> <th>4</th> <th>5</th> </tr> </thead> <tbody> <tr><td>1 B</td><td>0.000000</td><td></td><td></td><td></td><td></td></tr> <tr><td>2 B</td><td>1.781652</td><td>0.000000</td><td></td><td></td><td></td></tr> <tr><td>3 B</td><td>2.653823</td><td>1.827342</td><td>0.000000</td><td></td><td></td></tr> <tr><td>4 Co</td><td>2.146366</td><td>2.904790</td><td>2.138177</td><td>0.000000</td><td></td></tr> <tr><td>5 B</td><td>1.815955</td><td>1.756750</td><td>2.813817</td><td>3.109466</td><td>0.000000</td></tr> <tr><td>6 B</td><td>2.797970</td><td>1.811438</td><td>1.796418</td><td>3.055484</td><td>1.738781</td></tr> <tr><td>7 B</td><td>3.151251</td><td>2.877347</td><td>1.679690</td><td>2.124332</td><td>2.821499</td></tr> <tr><td>8 N</td><td>1.564956</td><td>2.621671</td><td>2.883776</td><td>1.978240</td><td>1.670120</td></tr> <tr><td>9 B</td><td>2.754175</td><td>2.869974</td><td>2.793141</td><td>2.751497</td><td>1.738604</td></tr> <tr><td>10 B</td><td>1.762082</td><td>1.706552</td><td>1.711567</td><td>1.975686</td><td>2.941728</td></tr> <tr> <th></th> <th>6</th> <th>7</th> <th>8</th> <th>9</th> <th>10</th> </tr> <tr><td>6 B</td><td>0.000000</td><td></td><td></td><td></td><td></td></tr> <tr><td>7 B</td><td>1.751606</td><td>0.000000</td><td></td><td></td><td></td></tr> <tr><td>8 N</td><td>2.531564</td><td>2.448750</td><td>0.000000</td><td></td><td></td></tr> <tr><td>9 B</td><td>1.722890</td><td>1.763090</td><td>1.555026</td><td>0.000000</td><td></td></tr> <tr><td>10 B</td><td>2.912594</td><td>2.985112</td><td>2.809465</td><td>3.542188</td><td>0.000000</td></tr> </tbody> </table>  |          | 1        | 2        | 3        | 4 | 5 | 1 B | 0.000000 |  |  |  |  | 2 B | 1.781652 | 0.000000 |  |  |  | 3 B | 2.653823 | 1.827342 | 0.000000 |  |  | 4 Co | 2.146366 | 2.904790 | 2.138177 | 0.000000 |  | 5 B | 1.815955 | 1.756750 | 2.813817 | 3.109466 | 0.000000 | 6 B | 2.797970 | 1.811438 | 1.796418 | 3.055484 | 1.738781 | 7 B | 3.151251 | 2.877347 | 1.679690 | 2.124332 | 2.821499 | 8 N | 1.564956 | 2.621671 | 2.883776 | 1.978240 | 1.670120 | 9 B  | 2.754175 | 2.869974 | 2.793141 | 2.751497 | 1.738604 | 10 B  | 1.762082 | 1.706552 | 1.711567 | 1.975686 | 2.941728 |  | 6 | 7 | 8 | 9 | 10 | 6 B | 0.000000 |  |  |  |  | 7 B | 1.751606 | 0.000000 |  |  |  | 8 N | 2.531564 | 2.448750 | 0.000000 |  |  | 9 B  | 1.722890 | 1.763090 | 1.555026 | 0.000000 |  | 10 B  | 2.912594 | 2.985112 | 2.809465 | 3.542188 | 0.000000 |
|                                                                                                                                                      | 1                                                                                                                                                                                                                                                                                                                                                                                                                                                                                                                                                                                                                                                                                                                                                                                                                                                                                                                                                                                                                                                                                                                                                                                                                                                                                                                                                                                                                                                                                                                                                                                                                                                                                                                               | 2        | 3        | 4        | 5        |   |   |     |          |  |  |  |  |     |          |          |  |  |  |     |          |          |          |  |  |      |          |          |          |          |  |     |          |          |          |          |          |     |          |          |          |          |          |     |          |          |          |          |          |     |          |          |          |          |          |      |          |          |          |          |          |       |          |          |          |          |          |  |   |   |   |   |    |     |          |  |  |  |  |     |          |          |  |  |  |     |          |          |          |  |  |      |          |          |          |          |  |       |          |          |          |          |          |
| 1 B                                                                                                                                                  | 0.000000                                                                                                                                                                                                                                                                                                                                                                                                                                                                                                                                                                                                                                                                                                                                                                                                                                                                                                                                                                                                                                                                                                                                                                                                                                                                                                                                                                                                                                                                                                                                                                                                                                                                                                                        |          |          |          |          |   |   |     |          |  |  |  |  |     |          |          |  |  |  |     |          |          |          |  |  |      |          |          |          |          |  |     |          |          |          |          |          |     |          |          |          |          |          |     |          |          |          |          |          |     |          |          |          |          |          |      |          |          |          |          |          |       |          |          |          |          |          |  |   |   |   |   |    |     |          |  |  |  |  |     |          |          |  |  |  |     |          |          |          |  |  |      |          |          |          |          |  |       |          |          |          |          |          |
| 2 B                                                                                                                                                  | 1.781652                                                                                                                                                                                                                                                                                                                                                                                                                                                                                                                                                                                                                                                                                                                                                                                                                                                                                                                                                                                                                                                                                                                                                                                                                                                                                                                                                                                                                                                                                                                                                                                                                                                                                                                        | 0.000000 |          |          |          |   |   |     |          |  |  |  |  |     |          |          |  |  |  |     |          |          |          |  |  |      |          |          |          |          |  |     |          |          |          |          |          |     |          |          |          |          |          |     |          |          |          |          |          |     |          |          |          |          |          |      |          |          |          |          |          |       |          |          |          |          |          |  |   |   |   |   |    |     |          |  |  |  |  |     |          |          |  |  |  |     |          |          |          |  |  |      |          |          |          |          |  |       |          |          |          |          |          |
| 3 B                                                                                                                                                  | 2.653823                                                                                                                                                                                                                                                                                                                                                                                                                                                                                                                                                                                                                                                                                                                                                                                                                                                                                                                                                                                                                                                                                                                                                                                                                                                                                                                                                                                                                                                                                                                                                                                                                                                                                                                        | 1.827342 | 0.000000 |          |          |   |   |     |          |  |  |  |  |     |          |          |  |  |  |     |          |          |          |  |  |      |          |          |          |          |  |     |          |          |          |          |          |     |          |          |          |          |          |     |          |          |          |          |          |     |          |          |          |          |          |      |          |          |          |          |          |       |          |          |          |          |          |  |   |   |   |   |    |     |          |  |  |  |  |     |          |          |  |  |  |     |          |          |          |  |  |      |          |          |          |          |  |       |          |          |          |          |          |
| 4 Co                                                                                                                                                 | 2.146366                                                                                                                                                                                                                                                                                                                                                                                                                                                                                                                                                                                                                                                                                                                                                                                                                                                                                                                                                                                                                                                                                                                                                                                                                                                                                                                                                                                                                                                                                                                                                                                                                                                                                                                        | 2.904790 | 2.138177 | 0.000000 |          |   |   |     |          |  |  |  |  |     |          |          |  |  |  |     |          |          |          |  |  |      |          |          |          |          |  |     |          |          |          |          |          |     |          |          |          |          |          |     |          |          |          |          |          |     |          |          |          |          |          |      |          |          |          |          |          |       |          |          |          |          |          |  |   |   |   |   |    |     |          |  |  |  |  |     |          |          |  |  |  |     |          |          |          |  |  |      |          |          |          |          |  |       |          |          |          |          |          |
| 5 B                                                                                                                                                  | 1.815955                                                                                                                                                                                                                                                                                                                                                                                                                                                                                                                                                                                                                                                                                                                                                                                                                                                                                                                                                                                                                                                                                                                                                                                                                                                                                                                                                                                                                                                                                                                                                                                                                                                                                                                        | 1.756750 | 2.813817 | 3.109466 | 0.000000 |   |   |     |          |  |  |  |  |     |          |          |  |  |  |     |          |          |          |  |  |      |          |          |          |          |  |     |          |          |          |          |          |     |          |          |          |          |          |     |          |          |          |          |          |     |          |          |          |          |          |      |          |          |          |          |          |       |          |          |          |          |          |  |   |   |   |   |    |     |          |  |  |  |  |     |          |          |  |  |  |     |          |          |          |  |  |      |          |          |          |          |  |       |          |          |          |          |          |
| 6 B                                                                                                                                                  | 2.797970                                                                                                                                                                                                                                                                                                                                                                                                                                                                                                                                                                                                                                                                                                                                                                                                                                                                                                                                                                                                                                                                                                                                                                                                                                                                                                                                                                                                                                                                                                                                                                                                                                                                                                                        | 1.811438 | 1.796418 | 3.055484 | 1.738781 |   |   |     |          |  |  |  |  |     |          |          |  |  |  |     |          |          |          |  |  |      |          |          |          |          |  |     |          |          |          |          |          |     |          |          |          |          |          |     |          |          |          |          |          |     |          |          |          |          |          |      |          |          |          |          |          |       |          |          |          |          |          |  |   |   |   |   |    |     |          |  |  |  |  |     |          |          |  |  |  |     |          |          |          |  |  |      |          |          |          |          |  |       |          |          |          |          |          |
| 7 B                                                                                                                                                  | 3.151251                                                                                                                                                                                                                                                                                                                                                                                                                                                                                                                                                                                                                                                                                                                                                                                                                                                                                                                                                                                                                                                                                                                                                                                                                                                                                                                                                                                                                                                                                                                                                                                                                                                                                                                        | 2.877347 | 1.679690 | 2.124332 | 2.821499 |   |   |     |          |  |  |  |  |     |          |          |  |  |  |     |          |          |          |  |  |      |          |          |          |          |  |     |          |          |          |          |          |     |          |          |          |          |          |     |          |          |          |          |          |     |          |          |          |          |          |      |          |          |          |          |          |       |          |          |          |          |          |  |   |   |   |   |    |     |          |  |  |  |  |     |          |          |  |  |  |     |          |          |          |  |  |      |          |          |          |          |  |       |          |          |          |          |          |
| 8 N                                                                                                                                                  | 1.564956                                                                                                                                                                                                                                                                                                                                                                                                                                                                                                                                                                                                                                                                                                                                                                                                                                                                                                                                                                                                                                                                                                                                                                                                                                                                                                                                                                                                                                                                                                                                                                                                                                                                                                                        | 2.621671 | 2.883776 | 1.978240 | 1.670120 |   |   |     |          |  |  |  |  |     |          |          |  |  |  |     |          |          |          |  |  |      |          |          |          |          |  |     |          |          |          |          |          |     |          |          |          |          |          |     |          |          |          |          |          |     |          |          |          |          |          |      |          |          |          |          |          |       |          |          |          |          |          |  |   |   |   |   |    |     |          |  |  |  |  |     |          |          |  |  |  |     |          |          |          |  |  |      |          |          |          |          |  |       |          |          |          |          |          |
| 9 B                                                                                                                                                  | 2.754175                                                                                                                                                                                                                                                                                                                                                                                                                                                                                                                                                                                                                                                                                                                                                                                                                                                                                                                                                                                                                                                                                                                                                                                                                                                                                                                                                                                                                                                                                                                                                                                                                                                                                                                        | 2.869974 | 2.793141 | 2.751497 | 1.738604 |   |   |     |          |  |  |  |  |     |          |          |  |  |  |     |          |          |          |  |  |      |          |          |          |          |  |     |          |          |          |          |          |     |          |          |          |          |          |     |          |          |          |          |          |     |          |          |          |          |          |      |          |          |          |          |          |       |          |          |          |          |          |  |   |   |   |   |    |     |          |  |  |  |  |     |          |          |  |  |  |     |          |          |          |  |  |      |          |          |          |          |  |       |          |          |          |          |          |
| 10 B                                                                                                                                                 | 1.762082                                                                                                                                                                                                                                                                                                                                                                                                                                                                                                                                                                                                                                                                                                                                                                                                                                                                                                                                                                                                                                                                                                                                                                                                                                                                                                                                                                                                                                                                                                                                                                                                                                                                                                                        | 1.706552 | 1.711567 | 1.975686 | 2.941728 |   |   |     |          |  |  |  |  |     |          |          |  |  |  |     |          |          |          |  |  |      |          |          |          |          |  |     |          |          |          |          |          |     |          |          |          |          |          |     |          |          |          |          |          |     |          |          |          |          |          |      |          |          |          |          |          |       |          |          |          |          |          |  |   |   |   |   |    |     |          |  |  |  |  |     |          |          |  |  |  |     |          |          |          |  |  |      |          |          |          |          |  |       |          |          |          |          |          |
|                                                                                                                                                      | 6                                                                                                                                                                                                                                                                                                                                                                                                                                                                                                                                                                                                                                                                                                                                                                                                                                                                                                                                                                                                                                                                                                                                                                                                                                                                                                                                                                                                                                                                                                                                                                                                                                                                                                                               | 7        | 8        | 9        | 10       |   |   |     |          |  |  |  |  |     |          |          |  |  |  |     |          |          |          |  |  |      |          |          |          |          |  |     |          |          |          |          |          |     |          |          |          |          |          |     |          |          |          |          |          |     |          |          |          |          |          |      |          |          |          |          |          |       |          |          |          |          |          |  |   |   |   |   |    |     |          |  |  |  |  |     |          |          |  |  |  |     |          |          |          |  |  |      |          |          |          |          |  |       |          |          |          |          |          |
| 6 B                                                                                                                                                  | 0.000000                                                                                                                                                                                                                                                                                                                                                                                                                                                                                                                                                                                                                                                                                                                                                                                                                                                                                                                                                                                                                                                                                                                                                                                                                                                                                                                                                                                                                                                                                                                                                                                                                                                                                                                        |          |          |          |          |   |   |     |          |  |  |  |  |     |          |          |  |  |  |     |          |          |          |  |  |      |          |          |          |          |  |     |          |          |          |          |          |     |          |          |          |          |          |     |          |          |          |          |          |     |          |          |          |          |          |      |          |          |          |          |          |       |          |          |          |          |          |  |   |   |   |   |    |     |          |  |  |  |  |     |          |          |  |  |  |     |          |          |          |  |  |      |          |          |          |          |  |       |          |          |          |          |          |
| 7 B                                                                                                                                                  | 1.751606                                                                                                                                                                                                                                                                                                                                                                                                                                                                                                                                                                                                                                                                                                                                                                                                                                                                                                                                                                                                                                                                                                                                                                                                                                                                                                                                                                                                                                                                                                                                                                                                                                                                                                                        | 0.000000 |          |          |          |   |   |     |          |  |  |  |  |     |          |          |  |  |  |     |          |          |          |  |  |      |          |          |          |          |  |     |          |          |          |          |          |     |          |          |          |          |          |     |          |          |          |          |          |     |          |          |          |          |          |      |          |          |          |          |          |       |          |          |          |          |          |  |   |   |   |   |    |     |          |  |  |  |  |     |          |          |  |  |  |     |          |          |          |  |  |      |          |          |          |          |  |       |          |          |          |          |          |
| 8 N                                                                                                                                                  | 2.531564                                                                                                                                                                                                                                                                                                                                                                                                                                                                                                                                                                                                                                                                                                                                                                                                                                                                                                                                                                                                                                                                                                                                                                                                                                                                                                                                                                                                                                                                                                                                                                                                                                                                                                                        | 2.448750 | 0.000000 |          |          |   |   |     |          |  |  |  |  |     |          |          |  |  |  |     |          |          |          |  |  |      |          |          |          |          |  |     |          |          |          |          |          |     |          |          |          |          |          |     |          |          |          |          |          |     |          |          |          |          |          |      |          |          |          |          |          |       |          |          |          |          |          |  |   |   |   |   |    |     |          |  |  |  |  |     |          |          |  |  |  |     |          |          |          |  |  |      |          |          |          |          |  |       |          |          |          |          |          |
| 9 B                                                                                                                                                  | 1.722890                                                                                                                                                                                                                                                                                                                                                                                                                                                                                                                                                                                                                                                                                                                                                                                                                                                                                                                                                                                                                                                                                                                                                                                                                                                                                                                                                                                                                                                                                                                                                                                                                                                                                                                        | 1.763090 | 1.555026 | 0.000000 |          |   |   |     |          |  |  |  |  |     |          |          |  |  |  |     |          |          |          |  |  |      |          |          |          |          |  |     |          |          |          |          |          |     |          |          |          |          |          |     |          |          |          |          |          |     |          |          |          |          |          |      |          |          |          |          |          |       |          |          |          |          |          |  |   |   |   |   |    |     |          |  |  |  |  |     |          |          |  |  |  |     |          |          |          |  |  |      |          |          |          |          |  |       |          |          |          |          |          |
| 10 B                                                                                                                                                 | 2.912594                                                                                                                                                                                                                                                                                                                                                                                                                                                                                                                                                                                                                                                                                                                                                                                                                                                                                                                                                                                                                                                                                                                                                                                                                                                                                                                                                                                                                                                                                                                                                                                                                                                                                                                        | 2.985112 | 2.809465 | 3.542188 | 0.000000 |   |   |     |          |  |  |  |  |     |          |          |  |  |  |     |          |          |          |  |  |      |          |          |          |          |  |     |          |          |          |          |          |     |          |          |          |          |          |     |          |          |          |          |          |     |          |          |          |          |          |      |          |          |          |          |          |       |          |          |          |          |          |  |   |   |   |   |    |     |          |  |  |  |  |     |          |          |  |  |  |     |          |          |          |  |  |      |          |          |          |          |  |       |          |          |          |          |          |
|  <p>5. -1835.218435 +36.8 H/L 2.19 C<sub>1</sub></p>              | <table border="1"> <thead> <tr> <th></th> <th>1</th> <th>2</th> <th>3</th> <th>4</th> <th>5</th> </tr> </thead> <tbody> <tr><td>1 B</td><td>0.000000</td><td></td><td></td><td></td><td></td></tr> <tr><td>2 B</td><td>1.724516</td><td>0.000000</td><td></td><td></td><td></td></tr> <tr><td>3 B</td><td>2.869349</td><td>1.705222</td><td>0.000000</td><td></td><td></td></tr> <tr><td>4 N</td><td>1.786484</td><td>2.651821</td><td>2.744774</td><td>0.000000</td><td></td></tr> <tr><td>5 B</td><td>1.797367</td><td>1.796879</td><td>1.669538</td><td>1.728512</td><td>0.000000</td></tr> <tr><td>6 B</td><td>1.786754</td><td>1.806151</td><td>2.919734</td><td>2.432356</td><td>2.820264</td></tr> <tr><td>7 B</td><td>1.706792</td><td>2.886597</td><td>3.670879</td><td>1.597051</td><td>2.873706</td></tr> <tr><td>8 B</td><td>2.830430</td><td>2.571961</td><td>1.669888</td><td>1.699504</td><td>1.845670</td></tr> <tr><td>9 B</td><td>2.779353</td><td>1.805211</td><td>1.707515</td><td>2.670207</td><td>2.585783</td></tr> <tr><td>10 Co</td><td>3.028794</td><td>3.251722</td><td>3.270859</td><td>2.073896</td><td>3.274382</td></tr> <tr> <th></th> <th>6</th> <th>7</th> <th>8</th> <th>9</th> <th>10</th> </tr> <tr><td>6 B</td><td>0.000000</td><td></td><td></td><td></td><td></td></tr> <tr><td>7 B</td><td>1.707956</td><td>0.000000</td><td></td><td></td><td></td></tr> <tr><td>8 B</td><td>2.820144</td><td>2.876513</td><td>0.000000</td><td></td><td></td></tr> <tr><td>9 B</td><td>1.793601</td><td>2.910290</td><td>1.847059</td><td>0.000000</td><td></td></tr> <tr><td>10 Co</td><td>2.149892</td><td>1.947618</td><td>2.086241</td><td>2.105806</td><td>0.000000</td></tr> </tbody> </table> |          | 1        | 2        | 3        | 4 | 5 | 1 B | 0.000000 |  |  |  |  | 2 B | 1.724516 | 0.000000 |  |  |  | 3 B | 2.869349 | 1.705222 | 0.000000 |  |  | 4 N  | 1.786484 | 2.651821 | 2.744774 | 0.000000 |  | 5 B | 1.797367 | 1.796879 | 1.669538 | 1.728512 | 0.000000 | 6 B | 1.786754 | 1.806151 | 2.919734 | 2.432356 | 2.820264 | 7 B | 1.706792 | 2.886597 | 3.670879 | 1.597051 | 2.873706 | 8 B | 2.830430 | 2.571961 | 1.669888 | 1.699504 | 1.845670 | 9 B  | 2.779353 | 1.805211 | 1.707515 | 2.670207 | 2.585783 | 10 Co | 3.028794 | 3.251722 | 3.270859 | 2.073896 | 3.274382 |  | 6 | 7 | 8 | 9 | 10 | 6 B | 0.000000 |  |  |  |  | 7 B | 1.707956 | 0.000000 |  |  |  | 8 B | 2.820144 | 2.876513 | 0.000000 |  |  | 9 B  | 1.793601 | 2.910290 | 1.847059 | 0.000000 |  | 10 Co | 2.149892 | 1.947618 | 2.086241 | 2.105806 | 0.000000 |
|                                                                                                                                                      | 1                                                                                                                                                                                                                                                                                                                                                                                                                                                                                                                                                                                                                                                                                                                                                                                                                                                                                                                                                                                                                                                                                                                                                                                                                                                                                                                                                                                                                                                                                                                                                                                                                                                                                                                               | 2        | 3        | 4        | 5        |   |   |     |          |  |  |  |  |     |          |          |  |  |  |     |          |          |          |  |  |      |          |          |          |          |  |     |          |          |          |          |          |     |          |          |          |          |          |     |          |          |          |          |          |     |          |          |          |          |          |      |          |          |          |          |          |       |          |          |          |          |          |  |   |   |   |   |    |     |          |  |  |  |  |     |          |          |  |  |  |     |          |          |          |  |  |      |          |          |          |          |  |       |          |          |          |          |          |
| 1 B                                                                                                                                                  | 0.000000                                                                                                                                                                                                                                                                                                                                                                                                                                                                                                                                                                                                                                                                                                                                                                                                                                                                                                                                                                                                                                                                                                                                                                                                                                                                                                                                                                                                                                                                                                                                                                                                                                                                                                                        |          |          |          |          |   |   |     |          |  |  |  |  |     |          |          |  |  |  |     |          |          |          |  |  |      |          |          |          |          |  |     |          |          |          |          |          |     |          |          |          |          |          |     |          |          |          |          |          |     |          |          |          |          |          |      |          |          |          |          |          |       |          |          |          |          |          |  |   |   |   |   |    |     |          |  |  |  |  |     |          |          |  |  |  |     |          |          |          |  |  |      |          |          |          |          |  |       |          |          |          |          |          |
| 2 B                                                                                                                                                  | 1.724516                                                                                                                                                                                                                                                                                                                                                                                                                                                                                                                                                                                                                                                                                                                                                                                                                                                                                                                                                                                                                                                                                                                                                                                                                                                                                                                                                                                                                                                                                                                                                                                                                                                                                                                        | 0.000000 |          |          |          |   |   |     |          |  |  |  |  |     |          |          |  |  |  |     |          |          |          |  |  |      |          |          |          |          |  |     |          |          |          |          |          |     |          |          |          |          |          |     |          |          |          |          |          |     |          |          |          |          |          |      |          |          |          |          |          |       |          |          |          |          |          |  |   |   |   |   |    |     |          |  |  |  |  |     |          |          |  |  |  |     |          |          |          |  |  |      |          |          |          |          |  |       |          |          |          |          |          |
| 3 B                                                                                                                                                  | 2.869349                                                                                                                                                                                                                                                                                                                                                                                                                                                                                                                                                                                                                                                                                                                                                                                                                                                                                                                                                                                                                                                                                                                                                                                                                                                                                                                                                                                                                                                                                                                                                                                                                                                                                                                        | 1.705222 | 0.000000 |          |          |   |   |     |          |  |  |  |  |     |          |          |  |  |  |     |          |          |          |  |  |      |          |          |          |          |  |     |          |          |          |          |          |     |          |          |          |          |          |     |          |          |          |          |          |     |          |          |          |          |          |      |          |          |          |          |          |       |          |          |          |          |          |  |   |   |   |   |    |     |          |  |  |  |  |     |          |          |  |  |  |     |          |          |          |  |  |      |          |          |          |          |  |       |          |          |          |          |          |
| 4 N                                                                                                                                                  | 1.786484                                                                                                                                                                                                                                                                                                                                                                                                                                                                                                                                                                                                                                                                                                                                                                                                                                                                                                                                                                                                                                                                                                                                                                                                                                                                                                                                                                                                                                                                                                                                                                                                                                                                                                                        | 2.651821 | 2.744774 | 0.000000 |          |   |   |     |          |  |  |  |  |     |          |          |  |  |  |     |          |          |          |  |  |      |          |          |          |          |  |     |          |          |          |          |          |     |          |          |          |          |          |     |          |          |          |          |          |     |          |          |          |          |          |      |          |          |          |          |          |       |          |          |          |          |          |  |   |   |   |   |    |     |          |  |  |  |  |     |          |          |  |  |  |     |          |          |          |  |  |      |          |          |          |          |  |       |          |          |          |          |          |
| 5 B                                                                                                                                                  | 1.797367                                                                                                                                                                                                                                                                                                                                                                                                                                                                                                                                                                                                                                                                                                                                                                                                                                                                                                                                                                                                                                                                                                                                                                                                                                                                                                                                                                                                                                                                                                                                                                                                                                                                                                                        | 1.796879 | 1.669538 | 1.728512 | 0.000000 |   |   |     |          |  |  |  |  |     |          |          |  |  |  |     |          |          |          |  |  |      |          |          |          |          |  |     |          |          |          |          |          |     |          |          |          |          |          |     |          |          |          |          |          |     |          |          |          |          |          |      |          |          |          |          |          |       |          |          |          |          |          |  |   |   |   |   |    |     |          |  |  |  |  |     |          |          |  |  |  |     |          |          |          |  |  |      |          |          |          |          |  |       |          |          |          |          |          |
| 6 B                                                                                                                                                  | 1.786754                                                                                                                                                                                                                                                                                                                                                                                                                                                                                                                                                                                                                                                                                                                                                                                                                                                                                                                                                                                                                                                                                                                                                                                                                                                                                                                                                                                                                                                                                                                                                                                                                                                                                                                        | 1.806151 | 2.919734 | 2.432356 | 2.820264 |   |   |     |          |  |  |  |  |     |          |          |  |  |  |     |          |          |          |  |  |      |          |          |          |          |  |     |          |          |          |          |          |     |          |          |          |          |          |     |          |          |          |          |          |     |          |          |          |          |          |      |          |          |          |          |          |       |          |          |          |          |          |  |   |   |   |   |    |     |          |  |  |  |  |     |          |          |  |  |  |     |          |          |          |  |  |      |          |          |          |          |  |       |          |          |          |          |          |
| 7 B                                                                                                                                                  | 1.706792                                                                                                                                                                                                                                                                                                                                                                                                                                                                                                                                                                                                                                                                                                                                                                                                                                                                                                                                                                                                                                                                                                                                                                                                                                                                                                                                                                                                                                                                                                                                                                                                                                                                                                                        | 2.886597 | 3.670879 | 1.597051 | 2.873706 |   |   |     |          |  |  |  |  |     |          |          |  |  |  |     |          |          |          |  |  |      |          |          |          |          |  |     |          |          |          |          |          |     |          |          |          |          |          |     |          |          |          |          |          |     |          |          |          |          |          |      |          |          |          |          |          |       |          |          |          |          |          |  |   |   |   |   |    |     |          |  |  |  |  |     |          |          |  |  |  |     |          |          |          |  |  |      |          |          |          |          |  |       |          |          |          |          |          |
| 8 B                                                                                                                                                  | 2.830430                                                                                                                                                                                                                                                                                                                                                                                                                                                                                                                                                                                                                                                                                                                                                                                                                                                                                                                                                                                                                                                                                                                                                                                                                                                                                                                                                                                                                                                                                                                                                                                                                                                                                                                        | 2.571961 | 1.669888 | 1.699504 | 1.845670 |   |   |     |          |  |  |  |  |     |          |          |  |  |  |     |          |          |          |  |  |      |          |          |          |          |  |     |          |          |          |          |          |     |          |          |          |          |          |     |          |          |          |          |          |     |          |          |          |          |          |      |          |          |          |          |          |       |          |          |          |          |          |  |   |   |   |   |    |     |          |  |  |  |  |     |          |          |  |  |  |     |          |          |          |  |  |      |          |          |          |          |  |       |          |          |          |          |          |
| 9 B                                                                                                                                                  | 2.779353                                                                                                                                                                                                                                                                                                                                                                                                                                                                                                                                                                                                                                                                                                                                                                                                                                                                                                                                                                                                                                                                                                                                                                                                                                                                                                                                                                                                                                                                                                                                                                                                                                                                                                                        | 1.805211 | 1.707515 | 2.670207 | 2.585783 |   |   |     |          |  |  |  |  |     |          |          |  |  |  |     |          |          |          |  |  |      |          |          |          |          |  |     |          |          |          |          |          |     |          |          |          |          |          |     |          |          |          |          |          |     |          |          |          |          |          |      |          |          |          |          |          |       |          |          |          |          |          |  |   |   |   |   |    |     |          |  |  |  |  |     |          |          |  |  |  |     |          |          |          |  |  |      |          |          |          |          |  |       |          |          |          |          |          |
| 10 Co                                                                                                                                                | 3.028794                                                                                                                                                                                                                                                                                                                                                                                                                                                                                                                                                                                                                                                                                                                                                                                                                                                                                                                                                                                                                                                                                                                                                                                                                                                                                                                                                                                                                                                                                                                                                                                                                                                                                                                        | 3.251722 | 3.270859 | 2.073896 | 3.274382 |   |   |     |          |  |  |  |  |     |          |          |  |  |  |     |          |          |          |  |  |      |          |          |          |          |  |     |          |          |          |          |          |     |          |          |          |          |          |     |          |          |          |          |          |     |          |          |          |          |          |      |          |          |          |          |          |       |          |          |          |          |          |  |   |   |   |   |    |     |          |  |  |  |  |     |          |          |  |  |  |     |          |          |          |  |  |      |          |          |          |          |  |       |          |          |          |          |          |
|                                                                                                                                                      | 6                                                                                                                                                                                                                                                                                                                                                                                                                                                                                                                                                                                                                                                                                                                                                                                                                                                                                                                                                                                                                                                                                                                                                                                                                                                                                                                                                                                                                                                                                                                                                                                                                                                                                                                               | 7        | 8        | 9        | 10       |   |   |     |          |  |  |  |  |     |          |          |  |  |  |     |          |          |          |  |  |      |          |          |          |          |  |     |          |          |          |          |          |     |          |          |          |          |          |     |          |          |          |          |          |     |          |          |          |          |          |      |          |          |          |          |          |       |          |          |          |          |          |  |   |   |   |   |    |     |          |  |  |  |  |     |          |          |  |  |  |     |          |          |          |  |  |      |          |          |          |          |  |       |          |          |          |          |          |
| 6 B                                                                                                                                                  | 0.000000                                                                                                                                                                                                                                                                                                                                                                                                                                                                                                                                                                                                                                                                                                                                                                                                                                                                                                                                                                                                                                                                                                                                                                                                                                                                                                                                                                                                                                                                                                                                                                                                                                                                                                                        |          |          |          |          |   |   |     |          |  |  |  |  |     |          |          |  |  |  |     |          |          |          |  |  |      |          |          |          |          |  |     |          |          |          |          |          |     |          |          |          |          |          |     |          |          |          |          |          |     |          |          |          |          |          |      |          |          |          |          |          |       |          |          |          |          |          |  |   |   |   |   |    |     |          |  |  |  |  |     |          |          |  |  |  |     |          |          |          |  |  |      |          |          |          |          |  |       |          |          |          |          |          |
| 7 B                                                                                                                                                  | 1.707956                                                                                                                                                                                                                                                                                                                                                                                                                                                                                                                                                                                                                                                                                                                                                                                                                                                                                                                                                                                                                                                                                                                                                                                                                                                                                                                                                                                                                                                                                                                                                                                                                                                                                                                        | 0.000000 |          |          |          |   |   |     |          |  |  |  |  |     |          |          |  |  |  |     |          |          |          |  |  |      |          |          |          |          |  |     |          |          |          |          |          |     |          |          |          |          |          |     |          |          |          |          |          |     |          |          |          |          |          |      |          |          |          |          |          |       |          |          |          |          |          |  |   |   |   |   |    |     |          |  |  |  |  |     |          |          |  |  |  |     |          |          |          |  |  |      |          |          |          |          |  |       |          |          |          |          |          |
| 8 B                                                                                                                                                  | 2.820144                                                                                                                                                                                                                                                                                                                                                                                                                                                                                                                                                                                                                                                                                                                                                                                                                                                                                                                                                                                                                                                                                                                                                                                                                                                                                                                                                                                                                                                                                                                                                                                                                                                                                                                        | 2.876513 | 0.000000 |          |          |   |   |     |          |  |  |  |  |     |          |          |  |  |  |     |          |          |          |  |  |      |          |          |          |          |  |     |          |          |          |          |          |     |          |          |          |          |          |     |          |          |          |          |          |     |          |          |          |          |          |      |          |          |          |          |          |       |          |          |          |          |          |  |   |   |   |   |    |     |          |  |  |  |  |     |          |          |  |  |  |     |          |          |          |  |  |      |          |          |          |          |  |       |          |          |          |          |          |
| 9 B                                                                                                                                                  | 1.793601                                                                                                                                                                                                                                                                                                                                                                                                                                                                                                                                                                                                                                                                                                                                                                                                                                                                                                                                                                                                                                                                                                                                                                                                                                                                                                                                                                                                                                                                                                                                                                                                                                                                                                                        | 2.910290 | 1.847059 | 0.000000 |          |   |   |     |          |  |  |  |  |     |          |          |  |  |  |     |          |          |          |  |  |      |          |          |          |          |  |     |          |          |          |          |          |     |          |          |          |          |          |     |          |          |          |          |          |     |          |          |          |          |          |      |          |          |          |          |          |       |          |          |          |          |          |  |   |   |   |   |    |     |          |  |  |  |  |     |          |          |  |  |  |     |          |          |          |  |  |      |          |          |          |          |  |       |          |          |          |          |          |
| 10 Co                                                                                                                                                | 2.149892                                                                                                                                                                                                                                                                                                                                                                                                                                                                                                                                                                                                                                                                                                                                                                                                                                                                                                                                                                                                                                                                                                                                                                                                                                                                                                                                                                                                                                                                                                                                                                                                                                                                                                                        | 1.947618 | 2.086241 | 2.105806 | 0.000000 |   |   |     |          |  |  |  |  |     |          |          |  |  |  |     |          |          |          |  |  |      |          |          |          |          |  |     |          |          |          |          |          |     |          |          |          |          |          |     |          |          |          |          |          |     |          |          |          |          |          |      |          |          |          |          |          |       |          |          |          |          |          |  |   |   |   |   |    |     |          |  |  |  |  |     |          |          |  |  |  |     |          |          |          |  |  |      |          |          |          |          |  |       |          |          |          |          |          |

Table S3C. Energy ranking for all of the CpCoNHB<sub>8</sub>H<sub>8</sub> optimized structures:

| No | Initial structure      | Final energy (a.u.) | ΔE( kcal/mol) |
|----|------------------------|---------------------|---------------|
| 1  | BicapSqAntipr-Co2-c    | -1835.10111050      | 0.00          |
| 2  | Isocloso-Co3-d         | -1835.10111040      | 0.00          |
| 3  | Isocloso-Co4-d         | -1835.10111030      | 0.00          |
| 4  | TetrTriPri2-Co2-d      | -1835.10110950      | 0.00          |
| 5  | TetrTriPri1-Co2-d      | -1835.10110850      | 0.00          |
| 6  | TetrTriPri2-Co1-e      | -1835.10110850      | 0.00          |
| 7  | TetrTriPri2-Co3-d      | -1835.10110840      | 0.00          |
| 8  | BicapCub-Co2-d_r-48    | -1835.10110830      | 0.00          |
| 9  | TetrTriPri1-Co3-i      | -1835.10110830      | 0.00          |
| 10 | TetrTriPri2-Co3-c      | -1835.10110820      | 0.00          |
| 11 | TetrTriPri2-Co2-c_r-48 | -1835.10110750      | 0.00          |
| 12 | TetrTriPri2-Co1-a      | -1835.10110640      | 0.00          |
| 13 | Isocloso-Co4-c         | -1835.10110530      | 0.00          |
| 14 | PentagPrism-Co-e       | -1835.10110510      | 0.00          |
| 15 | Isocloso-Co1-b         | -1835.10110330      | 0.00          |
| 16 | TetrTriPri2-Co1-d      | -1835.10110230      | 0.01          |
| 17 | BicapCub-Co2-d_i-48    | -1835.09936420      | 1.10          |
| 18 | TetrTriPri2-Co2-c_i-48 | -1835.09936190      | 1.10          |
| 19 | BicapSqAntipr-Co2-a    | -1835.08944600      | 7.32          |
| 20 | BicapCub-Co2-a         | -1835.08944400      | 7.32          |
| 21 | TetrTriPri2-Co3-f      | -1835.08944180      | 7.32          |
| 22 | TetrTriPri2-Co3-a      | -1835.08943970      | 7.32          |
| 23 | Isocloso-Co4-e         | -1835.08943930      | 7.32          |
| 24 | TetrTriPri1-Co3-a      | -1835.08943930      | 7.32          |
| 25 | TetrTriPri2-Co2-e      | -1835.08943800      | 7.32          |
| 26 | Isocloso-Co2-d         | -1835.08940600      | 7.34          |
| 27 | Isocloso-Co3-b         | -1835.07101450      | 18.89         |
| 28 | BicapSqAntipr-Co1-d    | -1835.07097170      | 18.91         |
| 29 | BicapCub-Co1-c_r-391   | -1835.07092800      | 18.94         |
| 30 | TetrTriPri2-Co1-c      | -1835.07086830      | 18.98         |
| 31 | Isocloso-Co2-b         | -1835.07085920      | 18.98         |
| 32 | TetrTriPri2-Co2-b      | -1835.07082270      | 19.01         |
| 33 | Isocloso-Co1-a_r-196   | -1835.05896870      | 26.44         |
| 34 | BicapCub-Co2-g         | -1835.05896860      | 26.44         |
| 35 | Isocloso-Co4-f         | -1835.05896860      | 26.44         |
| 36 | TetrTriPri1-Co2-b      | -1835.05896850      | 26.44         |
| 37 | TetrTriPri2-Co1-b      | -1835.05896780      | 26.45         |
| 38 | TetrTriPri2-Co2-f      | -1835.05896780      | 26.45         |
| 39 | BicapSqAntipr-Co2-e    | -1835.05896770      | 26.45         |
| 40 | PenPr-Co-d             | -1835.05896640      | 26.45         |
| 41 | BicapCub-Co2-e         | -1835.05896500      | 26.45         |

|    |                        |                |       |
|----|------------------------|----------------|-------|
| 42 | Isocloso-Co1-a_i-196   | -1835.05525500 | 28.78 |
| 43 | TetrTriPri2-Co3-e      | -1835.05155790 | 31.10 |
| 44 | PentagPrism-Co-a       | -1835.05155700 | 31.10 |
| 45 | TetrTriPri1-Co3-b      | -1835.05155590 | 31.10 |
| 46 | TetrTriPri1-Co3-c      | -1835.04853870 | 32.99 |
| 47 | Isocloso-Co2-e         | -1835.04486280 | 35.30 |
| 48 | Isocloso-Co4-a_r-150   | -1835.04485850 | 35.30 |
| 49 | TetrTriPri1-Co3-e      | -1835.04484740 | 35.31 |
| 50 | BicapSqAntipr-Co2-d    | -1835.04484420 | 35.31 |
| 51 | PenPr-Co-c             | -1835.04372260 | 36.01 |
| 52 | BicapCub-Co2-f         | -1835.04372150 | 36.01 |
| 53 | PenPr-Co-e             | -1835.04253130 | 36.76 |
| 54 | PentagPrism-Co-b       | -1835.04125570 | 37.56 |
| 55 | Isocloso-Co2-f         | -1835.04125500 | 37.56 |
| 56 | BicapSqAntipr-Co2-f    | -1835.04125320 | 37.56 |
| 57 | BicapCub-Co2-c         | -1835.04125310 | 37.56 |
| 58 | Isocloso-Co1-c_r-356   | -1835.04125280 | 37.56 |
| 59 | Isocloso-Co4-b_r-283   | -1835.04125210 | 37.56 |
| 60 | Isocloso-Co4-a_i-150   | -1835.04090100 | 37.78 |
| 61 | TetrTriPri1-Co2-a      | -1835.03952670 | 38.65 |
| 62 | TetrTriPri1-Co1-c      | -1835.03875290 | 39.13 |
| 63 | TetrTriPri1-Co3-h      | -1835.03874290 | 39.14 |
| 64 | TetrTriPri1-Co1-a      | -1835.03767100 | 39.81 |
| 65 | TetrTriPri1-Co1-f      | -1835.03757470 | 39.87 |
| 66 | TetrTriPri2-Co3-b      | -1835.03523150 | 41.34 |
| 67 | TetrTriPri1-Co3-d      | -1835.03523140 | 41.34 |
| 68 | BicapSqAntipr-Co2-b    | -1835.03523040 | 41.34 |
| 69 | BicapCub-Co2-b         | -1835.03522790 | 41.34 |
| 70 | TetrTriPri2-Co1-f      | -1835.03479850 | 41.61 |
| 71 | Isocloso-Co3-f         | -1835.03479740 | 41.61 |
| 72 | Isocloso-Co2-a         | -1835.03307270 | 42.70 |
| 73 | Isocloso-Co3-e         | -1835.03306960 | 42.70 |
| 74 | BicapCub-Co1-a         | -1835.03305190 | 42.71 |
| 75 | Isocloso-Co2-c         | -1835.03271620 | 42.92 |
| 76 | BicapSqAntipr-Co1-a    | -1835.03270510 | 42.93 |
| 77 | Isocloso-Co3-c         | -1835.02940710 | 45.00 |
| 78 | TetrTriPri2-Co2-a      | -1835.02940430 | 45.00 |
| 79 | BicapSqAntipr-Co1-c    | -1835.02908330 | 45.20 |
| 80 | Isocloso-Co3-a         | -1835.02908170 | 45.20 |
| 81 | BicapSqAntipr-Co1-b    | -1835.02907990 | 45.20 |
| 82 | BicapCub-Co1-b         | -1835.02878910 | 45.38 |
| 83 | PentagPrism-Co-c_r-213 | -1835.02639040 | 46.89 |
| 84 | Isocloso-Co4-b_i-283   | -1835.02482070 | 47.87 |
| 85 | TetrTriPri1-Co2-e      | -1835.02075700 | 50.42 |

|    |                        |                |        |
|----|------------------------|----------------|--------|
| 86 | PenPr-Co-b             | -1835.02046270 | 50.61  |
| 87 | TetrTriPri1-Co2-c      | -1835.01796320 | 52.18  |
| 88 | TetrTriPri1-Co1-e      | -1835.01040110 | 56.92  |
| 89 | TetrTriPri1-Co1-d      | -1835.00859600 | 58.05  |
| 90 | TetrTriPri1-Co3-g      | -1835.00343130 | 61.30  |
| 91 | TetrTriPri1-Co1-b      | -1835.00257610 | 61.83  |
| 92 | TetrTriPri1-Co3-f      | -1835.00090390 | 62.88  |
| 93 | PenPr-Co-a             | -1834.99155820 | 68.75  |
| 94 | Isocloso-Co1-c_i-356   | -1834.98352280 | 73.79  |
| 95 | PentagPrism-Co-d       | -1834.97908320 | 76.57  |
| 96 | PentagPrism-Co-c_i-213 | -1834.97220300 | 80.89  |
| 97 | BicapCub-Co1-c_i-391   | -1834.92356330 | 111.41 |

Table S4A. Initial CpCoNHB<sub>9</sub>H<sub>9</sub> structures, 140 in all.

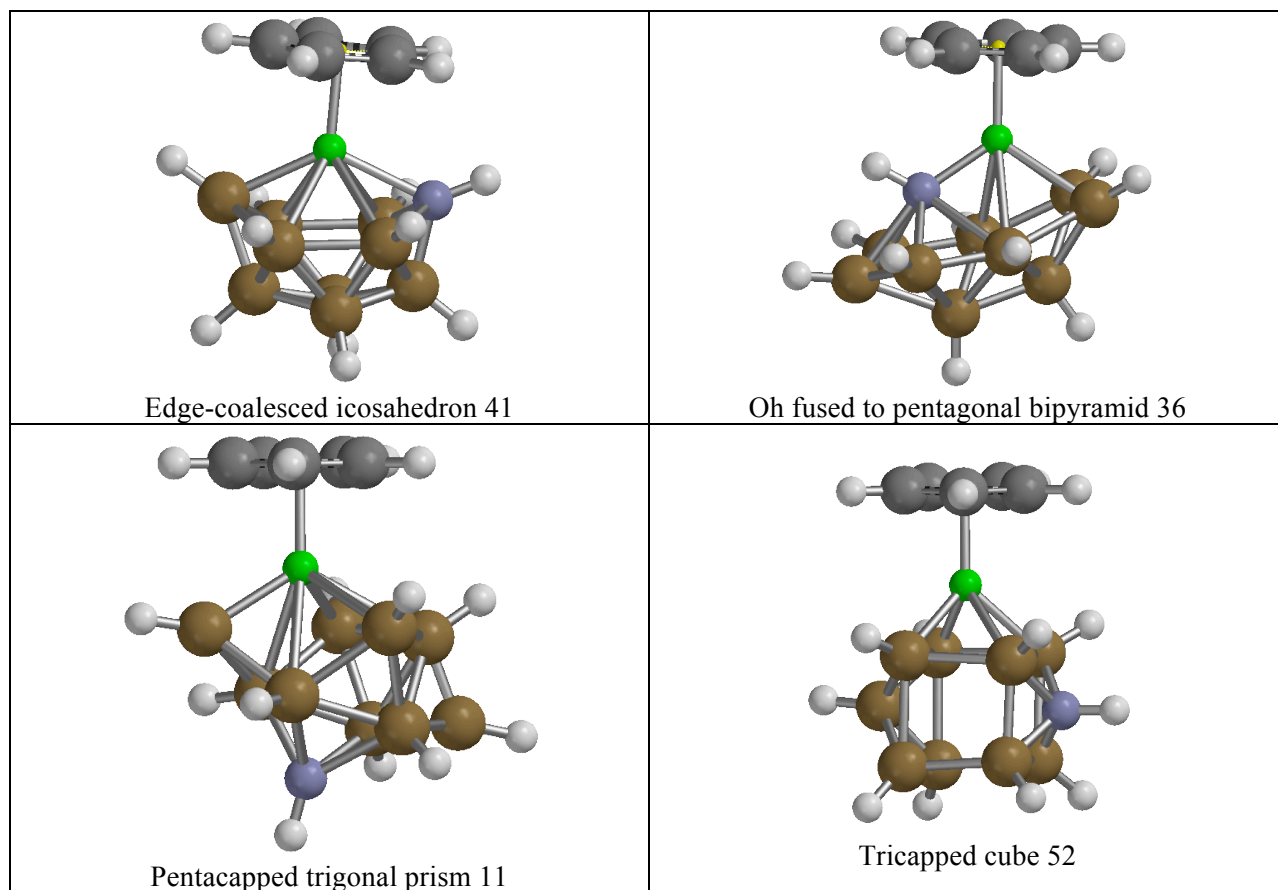

Table S4B. Distance table for the lowest-lying CpCoNHB<sub>9</sub>H<sub>9</sub> structures after M06L/6-311G(d,p) optimization. Included are the ZPcorrected E (a.u.), relative energy (kcal/mol), HOMO/LUMO gaps (eV) and symmetry.

| 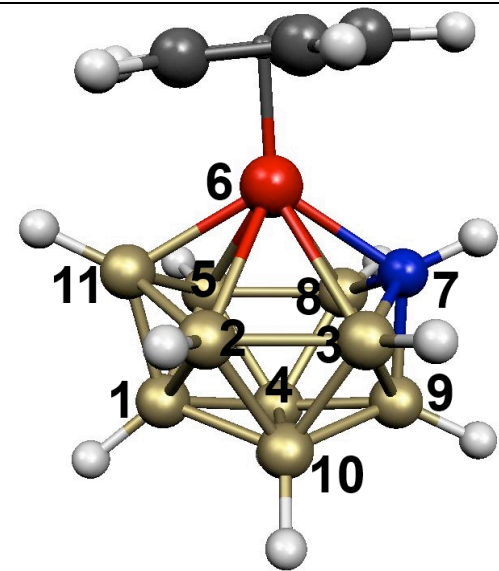 <p>1. -1860.724989 0.0 H/L 1.96 C<sub>s</sub></p>   | <table border="1"> <thead> <tr> <th></th> <th>1</th> <th>2</th> <th>3</th> <th>4</th> <th>5</th> </tr> </thead> <tbody> <tr><td>1 B</td><td>0.000000</td><td></td><td></td><td></td><td></td></tr> <tr><td>2 B</td><td>1.803912</td><td>0.000000</td><td></td><td></td><td></td></tr> <tr><td>3 B</td><td>2.905940</td><td>1.804882</td><td>0.000000</td><td></td><td></td></tr> <tr><td>4 B</td><td>1.763288</td><td>2.814197</td><td>2.792082</td><td>0.000000</td><td></td></tr> <tr><td>5 B</td><td>1.803937</td><td>2.621800</td><td>3.187004</td><td>1.778091</td><td>0.000000</td></tr> <tr><td>6 Co</td><td>3.002670</td><td>2.197352</td><td>2.305158</td><td>3.175543</td><td>2.197325</td></tr> <tr><td>7 N</td><td>3.361617</td><td>2.785386</td><td>1.536271</td><td>2.617789</td><td>2.785463</td></tr> <tr><td>8 B</td><td>2.905971</td><td>3.186938</td><td>2.631400</td><td>1.737816</td><td>1.804982</td></tr> <tr><td>9 B</td><td>2.904821</td><td>2.933797</td><td>1.819855</td><td>1.725776</td><td>2.933830</td></tr> <tr><td>10 B</td><td>1.763293</td><td>1.778136</td><td>1.737806</td><td>1.814800</td><td>2.814206</td></tr> <tr><td>11 B</td><td>1.694478</td><td>1.704902</td><td>3.103849</td><td>2.886076</td><td>1.704967</td></tr> <tr> <td></td> <td>6</td> <td>7</td> <td>8</td> <td>9</td> <td>10</td> </tr> <tr><td>6 Co</td><td>0.000000</td><td></td><td></td><td></td><td></td></tr> <tr><td>7 N</td><td>1.945973</td><td>0.000000</td><td></td><td></td><td></td></tr> <tr><td>8 B</td><td>2.305086</td><td>1.536241</td><td>0.000000</td><td></td><td></td></tr> <tr><td>9 B</td><td>3.145527</td><td>1.644534</td><td>1.819774</td><td>0.000000</td><td></td></tr> <tr><td>10 B</td><td>3.175579</td><td>2.617728</td><td>2.791985</td><td>1.725704</td><td>0.000000</td></tr> <tr><td>11 B</td><td>2.030754</td><td>3.359079</td><td>3.103909</td><td>3.713531</td><td>2.886083</td></tr> </tbody> </table> |          | 1        | 2        | 3        | 4 | 5 | 1 B  | 0.000000 |  |  |  |  | 2 B | 1.803912 | 0.000000 |  |  |  | 3 B | 2.905940 | 1.804882 | 0.000000 |  |  | 4 B | 1.763288 | 2.814197 | 2.792082 | 0.000000 |  | 5 B | 1.803937 | 2.621800 | 3.187004 | 1.778091 | 0.000000 | 6 Co | 3.002670 | 2.197352 | 2.305158 | 3.175543 | 2.197325 | 7 N | 3.361617 | 2.785386 | 1.536271 | 2.617789 | 2.785463 | 8 B | 2.905971 | 3.186938 | 2.631400 | 1.737816 | 1.804982 | 9 B | 2.904821 | 2.933797 | 1.819855 | 1.725776 | 2.933830 | 10 B | 1.763293 | 1.778136 | 1.737806 | 1.814800 | 2.814206 | 11 B | 1.694478 | 1.704902 | 3.103849 | 2.886076 | 1.704967 |  | 6 | 7 | 8 | 9 | 10 | 6 Co | 0.000000 |  |  |  |  | 7 N | 1.945973 | 0.000000 |  |  |  | 8 B | 2.305086 | 1.536241 | 0.000000 |  |  | 9 B | 3.145527 | 1.644534 | 1.819774 | 0.000000 |  | 10 B | 3.175579 | 2.617728 | 2.791985 | 1.725704 | 0.000000 | 11 B | 2.030754 | 3.359079 | 3.103909 | 3.713531 | 2.886083 |
|---------------------------------------------------------------------------------------------------------------------------------------|---------------------------------------------------------------------------------------------------------------------------------------------------------------------------------------------------------------------------------------------------------------------------------------------------------------------------------------------------------------------------------------------------------------------------------------------------------------------------------------------------------------------------------------------------------------------------------------------------------------------------------------------------------------------------------------------------------------------------------------------------------------------------------------------------------------------------------------------------------------------------------------------------------------------------------------------------------------------------------------------------------------------------------------------------------------------------------------------------------------------------------------------------------------------------------------------------------------------------------------------------------------------------------------------------------------------------------------------------------------------------------------------------------------------------------------------------------------------------------------------------------------------------------------------------------------------------------------------------------------------------------------------------------------------------------------------------------------------------------------------------------------------------------------------------------------------------------------------------------------------------------------------------------------------------------------------------------|----------|----------|----------|----------|---|---|------|----------|--|--|--|--|-----|----------|----------|--|--|--|-----|----------|----------|----------|--|--|-----|----------|----------|----------|----------|--|-----|----------|----------|----------|----------|----------|------|----------|----------|----------|----------|----------|-----|----------|----------|----------|----------|----------|-----|----------|----------|----------|----------|----------|-----|----------|----------|----------|----------|----------|------|----------|----------|----------|----------|----------|------|----------|----------|----------|----------|----------|--|---|---|---|---|----|------|----------|--|--|--|--|-----|----------|----------|--|--|--|-----|----------|----------|----------|--|--|-----|----------|----------|----------|----------|--|------|----------|----------|----------|----------|----------|------|----------|----------|----------|----------|----------|
|                                                                                                                                       | 1                                                                                                                                                                                                                                                                                                                                                                                                                                                                                                                                                                                                                                                                                                                                                                                                                                                                                                                                                                                                                                                                                                                                                                                                                                                                                                                                                                                                                                                                                                                                                                                                                                                                                                                                                                                                                                                                                                                                                       | 2        | 3        | 4        | 5        |   |   |      |          |  |  |  |  |     |          |          |  |  |  |     |          |          |          |  |  |     |          |          |          |          |  |     |          |          |          |          |          |      |          |          |          |          |          |     |          |          |          |          |          |     |          |          |          |          |          |     |          |          |          |          |          |      |          |          |          |          |          |      |          |          |          |          |          |  |   |   |   |   |    |      |          |  |  |  |  |     |          |          |  |  |  |     |          |          |          |  |  |     |          |          |          |          |  |      |          |          |          |          |          |      |          |          |          |          |          |
| 1 B                                                                                                                                   | 0.000000                                                                                                                                                                                                                                                                                                                                                                                                                                                                                                                                                                                                                                                                                                                                                                                                                                                                                                                                                                                                                                                                                                                                                                                                                                                                                                                                                                                                                                                                                                                                                                                                                                                                                                                                                                                                                                                                                                                                                |          |          |          |          |   |   |      |          |  |  |  |  |     |          |          |  |  |  |     |          |          |          |  |  |     |          |          |          |          |  |     |          |          |          |          |          |      |          |          |          |          |          |     |          |          |          |          |          |     |          |          |          |          |          |     |          |          |          |          |          |      |          |          |          |          |          |      |          |          |          |          |          |  |   |   |   |   |    |      |          |  |  |  |  |     |          |          |  |  |  |     |          |          |          |  |  |     |          |          |          |          |  |      |          |          |          |          |          |      |          |          |          |          |          |
| 2 B                                                                                                                                   | 1.803912                                                                                                                                                                                                                                                                                                                                                                                                                                                                                                                                                                                                                                                                                                                                                                                                                                                                                                                                                                                                                                                                                                                                                                                                                                                                                                                                                                                                                                                                                                                                                                                                                                                                                                                                                                                                                                                                                                                                                | 0.000000 |          |          |          |   |   |      |          |  |  |  |  |     |          |          |  |  |  |     |          |          |          |  |  |     |          |          |          |          |  |     |          |          |          |          |          |      |          |          |          |          |          |     |          |          |          |          |          |     |          |          |          |          |          |     |          |          |          |          |          |      |          |          |          |          |          |      |          |          |          |          |          |  |   |   |   |   |    |      |          |  |  |  |  |     |          |          |  |  |  |     |          |          |          |  |  |     |          |          |          |          |  |      |          |          |          |          |          |      |          |          |          |          |          |
| 3 B                                                                                                                                   | 2.905940                                                                                                                                                                                                                                                                                                                                                                                                                                                                                                                                                                                                                                                                                                                                                                                                                                                                                                                                                                                                                                                                                                                                                                                                                                                                                                                                                                                                                                                                                                                                                                                                                                                                                                                                                                                                                                                                                                                                                | 1.804882 | 0.000000 |          |          |   |   |      |          |  |  |  |  |     |          |          |  |  |  |     |          |          |          |  |  |     |          |          |          |          |  |     |          |          |          |          |          |      |          |          |          |          |          |     |          |          |          |          |          |     |          |          |          |          |          |     |          |          |          |          |          |      |          |          |          |          |          |      |          |          |          |          |          |  |   |   |   |   |    |      |          |  |  |  |  |     |          |          |  |  |  |     |          |          |          |  |  |     |          |          |          |          |  |      |          |          |          |          |          |      |          |          |          |          |          |
| 4 B                                                                                                                                   | 1.763288                                                                                                                                                                                                                                                                                                                                                                                                                                                                                                                                                                                                                                                                                                                                                                                                                                                                                                                                                                                                                                                                                                                                                                                                                                                                                                                                                                                                                                                                                                                                                                                                                                                                                                                                                                                                                                                                                                                                                | 2.814197 | 2.792082 | 0.000000 |          |   |   |      |          |  |  |  |  |     |          |          |  |  |  |     |          |          |          |  |  |     |          |          |          |          |  |     |          |          |          |          |          |      |          |          |          |          |          |     |          |          |          |          |          |     |          |          |          |          |          |     |          |          |          |          |          |      |          |          |          |          |          |      |          |          |          |          |          |  |   |   |   |   |    |      |          |  |  |  |  |     |          |          |  |  |  |     |          |          |          |  |  |     |          |          |          |          |  |      |          |          |          |          |          |      |          |          |          |          |          |
| 5 B                                                                                                                                   | 1.803937                                                                                                                                                                                                                                                                                                                                                                                                                                                                                                                                                                                                                                                                                                                                                                                                                                                                                                                                                                                                                                                                                                                                                                                                                                                                                                                                                                                                                                                                                                                                                                                                                                                                                                                                                                                                                                                                                                                                                | 2.621800 | 3.187004 | 1.778091 | 0.000000 |   |   |      |          |  |  |  |  |     |          |          |  |  |  |     |          |          |          |  |  |     |          |          |          |          |  |     |          |          |          |          |          |      |          |          |          |          |          |     |          |          |          |          |          |     |          |          |          |          |          |     |          |          |          |          |          |      |          |          |          |          |          |      |          |          |          |          |          |  |   |   |   |   |    |      |          |  |  |  |  |     |          |          |  |  |  |     |          |          |          |  |  |     |          |          |          |          |  |      |          |          |          |          |          |      |          |          |          |          |          |
| 6 Co                                                                                                                                  | 3.002670                                                                                                                                                                                                                                                                                                                                                                                                                                                                                                                                                                                                                                                                                                                                                                                                                                                                                                                                                                                                                                                                                                                                                                                                                                                                                                                                                                                                                                                                                                                                                                                                                                                                                                                                                                                                                                                                                                                                                | 2.197352 | 2.305158 | 3.175543 | 2.197325 |   |   |      |          |  |  |  |  |     |          |          |  |  |  |     |          |          |          |  |  |     |          |          |          |          |  |     |          |          |          |          |          |      |          |          |          |          |          |     |          |          |          |          |          |     |          |          |          |          |          |     |          |          |          |          |          |      |          |          |          |          |          |      |          |          |          |          |          |  |   |   |   |   |    |      |          |  |  |  |  |     |          |          |  |  |  |     |          |          |          |  |  |     |          |          |          |          |  |      |          |          |          |          |          |      |          |          |          |          |          |
| 7 N                                                                                                                                   | 3.361617                                                                                                                                                                                                                                                                                                                                                                                                                                                                                                                                                                                                                                                                                                                                                                                                                                                                                                                                                                                                                                                                                                                                                                                                                                                                                                                                                                                                                                                                                                                                                                                                                                                                                                                                                                                                                                                                                                                                                | 2.785386 | 1.536271 | 2.617789 | 2.785463 |   |   |      |          |  |  |  |  |     |          |          |  |  |  |     |          |          |          |  |  |     |          |          |          |          |  |     |          |          |          |          |          |      |          |          |          |          |          |     |          |          |          |          |          |     |          |          |          |          |          |     |          |          |          |          |          |      |          |          |          |          |          |      |          |          |          |          |          |  |   |   |   |   |    |      |          |  |  |  |  |     |          |          |  |  |  |     |          |          |          |  |  |     |          |          |          |          |  |      |          |          |          |          |          |      |          |          |          |          |          |
| 8 B                                                                                                                                   | 2.905971                                                                                                                                                                                                                                                                                                                                                                                                                                                                                                                                                                                                                                                                                                                                                                                                                                                                                                                                                                                                                                                                                                                                                                                                                                                                                                                                                                                                                                                                                                                                                                                                                                                                                                                                                                                                                                                                                                                                                | 3.186938 | 2.631400 | 1.737816 | 1.804982 |   |   |      |          |  |  |  |  |     |          |          |  |  |  |     |          |          |          |  |  |     |          |          |          |          |  |     |          |          |          |          |          |      |          |          |          |          |          |     |          |          |          |          |          |     |          |          |          |          |          |     |          |          |          |          |          |      |          |          |          |          |          |      |          |          |          |          |          |  |   |   |   |   |    |      |          |  |  |  |  |     |          |          |  |  |  |     |          |          |          |  |  |     |          |          |          |          |  |      |          |          |          |          |          |      |          |          |          |          |          |
| 9 B                                                                                                                                   | 2.904821                                                                                                                                                                                                                                                                                                                                                                                                                                                                                                                                                                                                                                                                                                                                                                                                                                                                                                                                                                                                                                                                                                                                                                                                                                                                                                                                                                                                                                                                                                                                                                                                                                                                                                                                                                                                                                                                                                                                                | 2.933797 | 1.819855 | 1.725776 | 2.933830 |   |   |      |          |  |  |  |  |     |          |          |  |  |  |     |          |          |          |  |  |     |          |          |          |          |  |     |          |          |          |          |          |      |          |          |          |          |          |     |          |          |          |          |          |     |          |          |          |          |          |     |          |          |          |          |          |      |          |          |          |          |          |      |          |          |          |          |          |  |   |   |   |   |    |      |          |  |  |  |  |     |          |          |  |  |  |     |          |          |          |  |  |     |          |          |          |          |  |      |          |          |          |          |          |      |          |          |          |          |          |
| 10 B                                                                                                                                  | 1.763293                                                                                                                                                                                                                                                                                                                                                                                                                                                                                                                                                                                                                                                                                                                                                                                                                                                                                                                                                                                                                                                                                                                                                                                                                                                                                                                                                                                                                                                                                                                                                                                                                                                                                                                                                                                                                                                                                                                                                | 1.778136 | 1.737806 | 1.814800 | 2.814206 |   |   |      |          |  |  |  |  |     |          |          |  |  |  |     |          |          |          |  |  |     |          |          |          |          |  |     |          |          |          |          |          |      |          |          |          |          |          |     |          |          |          |          |          |     |          |          |          |          |          |     |          |          |          |          |          |      |          |          |          |          |          |      |          |          |          |          |          |  |   |   |   |   |    |      |          |  |  |  |  |     |          |          |  |  |  |     |          |          |          |  |  |     |          |          |          |          |  |      |          |          |          |          |          |      |          |          |          |          |          |
| 11 B                                                                                                                                  | 1.694478                                                                                                                                                                                                                                                                                                                                                                                                                                                                                                                                                                                                                                                                                                                                                                                                                                                                                                                                                                                                                                                                                                                                                                                                                                                                                                                                                                                                                                                                                                                                                                                                                                                                                                                                                                                                                                                                                                                                                | 1.704902 | 3.103849 | 2.886076 | 1.704967 |   |   |      |          |  |  |  |  |     |          |          |  |  |  |     |          |          |          |  |  |     |          |          |          |          |  |     |          |          |          |          |          |      |          |          |          |          |          |     |          |          |          |          |          |     |          |          |          |          |          |     |          |          |          |          |          |      |          |          |          |          |          |      |          |          |          |          |          |  |   |   |   |   |    |      |          |  |  |  |  |     |          |          |  |  |  |     |          |          |          |  |  |     |          |          |          |          |  |      |          |          |          |          |          |      |          |          |          |          |          |
|                                                                                                                                       | 6                                                                                                                                                                                                                                                                                                                                                                                                                                                                                                                                                                                                                                                                                                                                                                                                                                                                                                                                                                                                                                                                                                                                                                                                                                                                                                                                                                                                                                                                                                                                                                                                                                                                                                                                                                                                                                                                                                                                                       | 7        | 8        | 9        | 10       |   |   |      |          |  |  |  |  |     |          |          |  |  |  |     |          |          |          |  |  |     |          |          |          |          |  |     |          |          |          |          |          |      |          |          |          |          |          |     |          |          |          |          |          |     |          |          |          |          |          |     |          |          |          |          |          |      |          |          |          |          |          |      |          |          |          |          |          |  |   |   |   |   |    |      |          |  |  |  |  |     |          |          |  |  |  |     |          |          |          |  |  |     |          |          |          |          |  |      |          |          |          |          |          |      |          |          |          |          |          |
| 6 Co                                                                                                                                  | 0.000000                                                                                                                                                                                                                                                                                                                                                                                                                                                                                                                                                                                                                                                                                                                                                                                                                                                                                                                                                                                                                                                                                                                                                                                                                                                                                                                                                                                                                                                                                                                                                                                                                                                                                                                                                                                                                                                                                                                                                |          |          |          |          |   |   |      |          |  |  |  |  |     |          |          |  |  |  |     |          |          |          |  |  |     |          |          |          |          |  |     |          |          |          |          |          |      |          |          |          |          |          |     |          |          |          |          |          |     |          |          |          |          |          |     |          |          |          |          |          |      |          |          |          |          |          |      |          |          |          |          |          |  |   |   |   |   |    |      |          |  |  |  |  |     |          |          |  |  |  |     |          |          |          |  |  |     |          |          |          |          |  |      |          |          |          |          |          |      |          |          |          |          |          |
| 7 N                                                                                                                                   | 1.945973                                                                                                                                                                                                                                                                                                                                                                                                                                                                                                                                                                                                                                                                                                                                                                                                                                                                                                                                                                                                                                                                                                                                                                                                                                                                                                                                                                                                                                                                                                                                                                                                                                                                                                                                                                                                                                                                                                                                                | 0.000000 |          |          |          |   |   |      |          |  |  |  |  |     |          |          |  |  |  |     |          |          |          |  |  |     |          |          |          |          |  |     |          |          |          |          |          |      |          |          |          |          |          |     |          |          |          |          |          |     |          |          |          |          |          |     |          |          |          |          |          |      |          |          |          |          |          |      |          |          |          |          |          |  |   |   |   |   |    |      |          |  |  |  |  |     |          |          |  |  |  |     |          |          |          |  |  |     |          |          |          |          |  |      |          |          |          |          |          |      |          |          |          |          |          |
| 8 B                                                                                                                                   | 2.305086                                                                                                                                                                                                                                                                                                                                                                                                                                                                                                                                                                                                                                                                                                                                                                                                                                                                                                                                                                                                                                                                                                                                                                                                                                                                                                                                                                                                                                                                                                                                                                                                                                                                                                                                                                                                                                                                                                                                                | 1.536241 | 0.000000 |          |          |   |   |      |          |  |  |  |  |     |          |          |  |  |  |     |          |          |          |  |  |     |          |          |          |          |  |     |          |          |          |          |          |      |          |          |          |          |          |     |          |          |          |          |          |     |          |          |          |          |          |     |          |          |          |          |          |      |          |          |          |          |          |      |          |          |          |          |          |  |   |   |   |   |    |      |          |  |  |  |  |     |          |          |  |  |  |     |          |          |          |  |  |     |          |          |          |          |  |      |          |          |          |          |          |      |          |          |          |          |          |
| 9 B                                                                                                                                   | 3.145527                                                                                                                                                                                                                                                                                                                                                                                                                                                                                                                                                                                                                                                                                                                                                                                                                                                                                                                                                                                                                                                                                                                                                                                                                                                                                                                                                                                                                                                                                                                                                                                                                                                                                                                                                                                                                                                                                                                                                | 1.644534 | 1.819774 | 0.000000 |          |   |   |      |          |  |  |  |  |     |          |          |  |  |  |     |          |          |          |  |  |     |          |          |          |          |  |     |          |          |          |          |          |      |          |          |          |          |          |     |          |          |          |          |          |     |          |          |          |          |          |     |          |          |          |          |          |      |          |          |          |          |          |      |          |          |          |          |          |  |   |   |   |   |    |      |          |  |  |  |  |     |          |          |  |  |  |     |          |          |          |  |  |     |          |          |          |          |  |      |          |          |          |          |          |      |          |          |          |          |          |
| 10 B                                                                                                                                  | 3.175579                                                                                                                                                                                                                                                                                                                                                                                                                                                                                                                                                                                                                                                                                                                                                                                                                                                                                                                                                                                                                                                                                                                                                                                                                                                                                                                                                                                                                                                                                                                                                                                                                                                                                                                                                                                                                                                                                                                                                | 2.617728 | 2.791985 | 1.725704 | 0.000000 |   |   |      |          |  |  |  |  |     |          |          |  |  |  |     |          |          |          |  |  |     |          |          |          |          |  |     |          |          |          |          |          |      |          |          |          |          |          |     |          |          |          |          |          |     |          |          |          |          |          |     |          |          |          |          |          |      |          |          |          |          |          |      |          |          |          |          |          |  |   |   |   |   |    |      |          |  |  |  |  |     |          |          |  |  |  |     |          |          |          |  |  |     |          |          |          |          |  |      |          |          |          |          |          |      |          |          |          |          |          |
| 11 B                                                                                                                                  | 2.030754                                                                                                                                                                                                                                                                                                                                                                                                                                                                                                                                                                                                                                                                                                                                                                                                                                                                                                                                                                                                                                                                                                                                                                                                                                                                                                                                                                                                                                                                                                                                                                                                                                                                                                                                                                                                                                                                                                                                                | 3.359079 | 3.103909 | 3.713531 | 2.886083 |   |   |      |          |  |  |  |  |     |          |          |  |  |  |     |          |          |          |  |  |     |          |          |          |          |  |     |          |          |          |          |          |      |          |          |          |          |          |     |          |          |          |          |          |     |          |          |          |          |          |     |          |          |          |          |          |      |          |          |          |          |          |      |          |          |          |          |          |  |   |   |   |   |    |      |          |  |  |  |  |     |          |          |  |  |  |     |          |          |          |  |  |     |          |          |          |          |  |      |          |          |          |          |          |      |          |          |          |          |          |
|  <p>2. -1860.715708 +5.8 H/L 2.78 C<sub>1</sub></p> | <table border="1"> <thead> <tr> <th></th> <th>1</th> <th>2</th> <th>3</th> <th>4</th> <th>5</th> </tr> </thead> <tbody> <tr><td>1 Co</td><td>0.000000</td><td></td><td></td><td></td><td></td></tr> <tr><td>2 B</td><td>2.166042</td><td>0.000000</td><td></td><td></td><td></td></tr> <tr><td>3 B</td><td>3.252153</td><td>2.722195</td><td>0.000000</td><td></td><td></td></tr> <tr><td>4 B</td><td>2.101193</td><td>2.633171</td><td>2.918521</td><td>0.000000</td><td></td></tr> <tr><td>5 B</td><td>2.985859</td><td>1.945378</td><td>2.910998</td><td>1.799268</td><td>0.000000</td></tr> <tr><td>6 B</td><td>3.195966</td><td>2.772656</td><td>1.746075</td><td>1.759451</td><td>1.768874</td></tr> <tr><td>7 B</td><td>3.525438</td><td>1.982715</td><td>1.800925</td><td>2.873433</td><td>1.756139</td></tr> <tr><td>8 B</td><td>1.918150</td><td>1.769480</td><td>3.665005</td><td>1.756117</td><td>1.671915</td></tr> <tr><td>9 B</td><td>2.085062</td><td>2.795918</td><td>1.759170</td><td>1.771178</td><td>2.828043</td></tr> <tr><td>10 B</td><td>2.010548</td><td>2.104489</td><td>1.796719</td><td>2.937048</td><td>3.264572</td></tr> <tr><td>11 N</td><td>2.974904</td><td>1.615259</td><td>1.637645</td><td>3.307199</td><td>2.743727</td></tr> <tr> <td></td> <td>6</td> <td>7</td> <td>8</td> <td>9</td> <td>10</td> </tr> <tr><td>6 B</td><td>0.000000</td><td></td><td></td><td></td><td></td></tr> <tr><td>7 B</td><td>1.743079</td><td>0.000000</td><td></td><td></td><td></td></tr> <tr><td>8 B</td><td>2.881647</td><td>2.981919</td><td>0.000000</td><td></td><td></td></tr> <tr><td>9 B</td><td>1.803875</td><td>2.799046</td><td>2.936478</td><td>0.000000</td><td></td></tr> <tr><td>10 B</td><td>2.822502</td><td>2.688934</td><td>3.139561</td><td>1.750990</td><td>0.000000</td></tr> <tr><td>11 N</td><td>2.629844</td><td>1.558270</td><td>3.190107</td><td>2.621586</td><td>1.555155</td></tr> </tbody> </table>  |          | 1        | 2        | 3        | 4 | 5 | 1 Co | 0.000000 |  |  |  |  | 2 B | 2.166042 | 0.000000 |  |  |  | 3 B | 3.252153 | 2.722195 | 0.000000 |  |  | 4 B | 2.101193 | 2.633171 | 2.918521 | 0.000000 |  | 5 B | 2.985859 | 1.945378 | 2.910998 | 1.799268 | 0.000000 | 6 B  | 3.195966 | 2.772656 | 1.746075 | 1.759451 | 1.768874 | 7 B | 3.525438 | 1.982715 | 1.800925 | 2.873433 | 1.756139 | 8 B | 1.918150 | 1.769480 | 3.665005 | 1.756117 | 1.671915 | 9 B | 2.085062 | 2.795918 | 1.759170 | 1.771178 | 2.828043 | 10 B | 2.010548 | 2.104489 | 1.796719 | 2.937048 | 3.264572 | 11 N | 2.974904 | 1.615259 | 1.637645 | 3.307199 | 2.743727 |  | 6 | 7 | 8 | 9 | 10 | 6 B  | 0.000000 |  |  |  |  | 7 B | 1.743079 | 0.000000 |  |  |  | 8 B | 2.881647 | 2.981919 | 0.000000 |  |  | 9 B | 1.803875 | 2.799046 | 2.936478 | 0.000000 |  | 10 B | 2.822502 | 2.688934 | 3.139561 | 1.750990 | 0.000000 | 11 N | 2.629844 | 1.558270 | 3.190107 | 2.621586 | 1.555155 |
|                                                                                                                                       | 1                                                                                                                                                                                                                                                                                                                                                                                                                                                                                                                                                                                                                                                                                                                                                                                                                                                                                                                                                                                                                                                                                                                                                                                                                                                                                                                                                                                                                                                                                                                                                                                                                                                                                                                                                                                                                                                                                                                                                       | 2        | 3        | 4        | 5        |   |   |      |          |  |  |  |  |     |          |          |  |  |  |     |          |          |          |  |  |     |          |          |          |          |  |     |          |          |          |          |          |      |          |          |          |          |          |     |          |          |          |          |          |     |          |          |          |          |          |     |          |          |          |          |          |      |          |          |          |          |          |      |          |          |          |          |          |  |   |   |   |   |    |      |          |  |  |  |  |     |          |          |  |  |  |     |          |          |          |  |  |     |          |          |          |          |  |      |          |          |          |          |          |      |          |          |          |          |          |
| 1 Co                                                                                                                                  | 0.000000                                                                                                                                                                                                                                                                                                                                                                                                                                                                                                                                                                                                                                                                                                                                                                                                                                                                                                                                                                                                                                                                                                                                                                                                                                                                                                                                                                                                                                                                                                                                                                                                                                                                                                                                                                                                                                                                                                                                                |          |          |          |          |   |   |      |          |  |  |  |  |     |          |          |  |  |  |     |          |          |          |  |  |     |          |          |          |          |  |     |          |          |          |          |          |      |          |          |          |          |          |     |          |          |          |          |          |     |          |          |          |          |          |     |          |          |          |          |          |      |          |          |          |          |          |      |          |          |          |          |          |  |   |   |   |   |    |      |          |  |  |  |  |     |          |          |  |  |  |     |          |          |          |  |  |     |          |          |          |          |  |      |          |          |          |          |          |      |          |          |          |          |          |
| 2 B                                                                                                                                   | 2.166042                                                                                                                                                                                                                                                                                                                                                                                                                                                                                                                                                                                                                                                                                                                                                                                                                                                                                                                                                                                                                                                                                                                                                                                                                                                                                                                                                                                                                                                                                                                                                                                                                                                                                                                                                                                                                                                                                                                                                | 0.000000 |          |          |          |   |   |      |          |  |  |  |  |     |          |          |  |  |  |     |          |          |          |  |  |     |          |          |          |          |  |     |          |          |          |          |          |      |          |          |          |          |          |     |          |          |          |          |          |     |          |          |          |          |          |     |          |          |          |          |          |      |          |          |          |          |          |      |          |          |          |          |          |  |   |   |   |   |    |      |          |  |  |  |  |     |          |          |  |  |  |     |          |          |          |  |  |     |          |          |          |          |  |      |          |          |          |          |          |      |          |          |          |          |          |
| 3 B                                                                                                                                   | 3.252153                                                                                                                                                                                                                                                                                                                                                                                                                                                                                                                                                                                                                                                                                                                                                                                                                                                                                                                                                                                                                                                                                                                                                                                                                                                                                                                                                                                                                                                                                                                                                                                                                                                                                                                                                                                                                                                                                                                                                | 2.722195 | 0.000000 |          |          |   |   |      |          |  |  |  |  |     |          |          |  |  |  |     |          |          |          |  |  |     |          |          |          |          |  |     |          |          |          |          |          |      |          |          |          |          |          |     |          |          |          |          |          |     |          |          |          |          |          |     |          |          |          |          |          |      |          |          |          |          |          |      |          |          |          |          |          |  |   |   |   |   |    |      |          |  |  |  |  |     |          |          |  |  |  |     |          |          |          |  |  |     |          |          |          |          |  |      |          |          |          |          |          |      |          |          |          |          |          |
| 4 B                                                                                                                                   | 2.101193                                                                                                                                                                                                                                                                                                                                                                                                                                                                                                                                                                                                                                                                                                                                                                                                                                                                                                                                                                                                                                                                                                                                                                                                                                                                                                                                                                                                                                                                                                                                                                                                                                                                                                                                                                                                                                                                                                                                                | 2.633171 | 2.918521 | 0.000000 |          |   |   |      |          |  |  |  |  |     |          |          |  |  |  |     |          |          |          |  |  |     |          |          |          |          |  |     |          |          |          |          |          |      |          |          |          |          |          |     |          |          |          |          |          |     |          |          |          |          |          |     |          |          |          |          |          |      |          |          |          |          |          |      |          |          |          |          |          |  |   |   |   |   |    |      |          |  |  |  |  |     |          |          |  |  |  |     |          |          |          |  |  |     |          |          |          |          |  |      |          |          |          |          |          |      |          |          |          |          |          |
| 5 B                                                                                                                                   | 2.985859                                                                                                                                                                                                                                                                                                                                                                                                                                                                                                                                                                                                                                                                                                                                                                                                                                                                                                                                                                                                                                                                                                                                                                                                                                                                                                                                                                                                                                                                                                                                                                                                                                                                                                                                                                                                                                                                                                                                                | 1.945378 | 2.910998 | 1.799268 | 0.000000 |   |   |      |          |  |  |  |  |     |          |          |  |  |  |     |          |          |          |  |  |     |          |          |          |          |  |     |          |          |          |          |          |      |          |          |          |          |          |     |          |          |          |          |          |     |          |          |          |          |          |     |          |          |          |          |          |      |          |          |          |          |          |      |          |          |          |          |          |  |   |   |   |   |    |      |          |  |  |  |  |     |          |          |  |  |  |     |          |          |          |  |  |     |          |          |          |          |  |      |          |          |          |          |          |      |          |          |          |          |          |
| 6 B                                                                                                                                   | 3.195966                                                                                                                                                                                                                                                                                                                                                                                                                                                                                                                                                                                                                                                                                                                                                                                                                                                                                                                                                                                                                                                                                                                                                                                                                                                                                                                                                                                                                                                                                                                                                                                                                                                                                                                                                                                                                                                                                                                                                | 2.772656 | 1.746075 | 1.759451 | 1.768874 |   |   |      |          |  |  |  |  |     |          |          |  |  |  |     |          |          |          |  |  |     |          |          |          |          |  |     |          |          |          |          |          |      |          |          |          |          |          |     |          |          |          |          |          |     |          |          |          |          |          |     |          |          |          |          |          |      |          |          |          |          |          |      |          |          |          |          |          |  |   |   |   |   |    |      |          |  |  |  |  |     |          |          |  |  |  |     |          |          |          |  |  |     |          |          |          |          |  |      |          |          |          |          |          |      |          |          |          |          |          |
| 7 B                                                                                                                                   | 3.525438                                                                                                                                                                                                                                                                                                                                                                                                                                                                                                                                                                                                                                                                                                                                                                                                                                                                                                                                                                                                                                                                                                                                                                                                                                                                                                                                                                                                                                                                                                                                                                                                                                                                                                                                                                                                                                                                                                                                                | 1.982715 | 1.800925 | 2.873433 | 1.756139 |   |   |      |          |  |  |  |  |     |          |          |  |  |  |     |          |          |          |  |  |     |          |          |          |          |  |     |          |          |          |          |          |      |          |          |          |          |          |     |          |          |          |          |          |     |          |          |          |          |          |     |          |          |          |          |          |      |          |          |          |          |          |      |          |          |          |          |          |  |   |   |   |   |    |      |          |  |  |  |  |     |          |          |  |  |  |     |          |          |          |  |  |     |          |          |          |          |  |      |          |          |          |          |          |      |          |          |          |          |          |
| 8 B                                                                                                                                   | 1.918150                                                                                                                                                                                                                                                                                                                                                                                                                                                                                                                                                                                                                                                                                                                                                                                                                                                                                                                                                                                                                                                                                                                                                                                                                                                                                                                                                                                                                                                                                                                                                                                                                                                                                                                                                                                                                                                                                                                                                | 1.769480 | 3.665005 | 1.756117 | 1.671915 |   |   |      |          |  |  |  |  |     |          |          |  |  |  |     |          |          |          |  |  |     |          |          |          |          |  |     |          |          |          |          |          |      |          |          |          |          |          |     |          |          |          |          |          |     |          |          |          |          |          |     |          |          |          |          |          |      |          |          |          |          |          |      |          |          |          |          |          |  |   |   |   |   |    |      |          |  |  |  |  |     |          |          |  |  |  |     |          |          |          |  |  |     |          |          |          |          |  |      |          |          |          |          |          |      |          |          |          |          |          |
| 9 B                                                                                                                                   | 2.085062                                                                                                                                                                                                                                                                                                                                                                                                                                                                                                                                                                                                                                                                                                                                                                                                                                                                                                                                                                                                                                                                                                                                                                                                                                                                                                                                                                                                                                                                                                                                                                                                                                                                                                                                                                                                                                                                                                                                                | 2.795918 | 1.759170 | 1.771178 | 2.828043 |   |   |      |          |  |  |  |  |     |          |          |  |  |  |     |          |          |          |  |  |     |          |          |          |          |  |     |          |          |          |          |          |      |          |          |          |          |          |     |          |          |          |          |          |     |          |          |          |          |          |     |          |          |          |          |          |      |          |          |          |          |          |      |          |          |          |          |          |  |   |   |   |   |    |      |          |  |  |  |  |     |          |          |  |  |  |     |          |          |          |  |  |     |          |          |          |          |  |      |          |          |          |          |          |      |          |          |          |          |          |
| 10 B                                                                                                                                  | 2.010548                                                                                                                                                                                                                                                                                                                                                                                                                                                                                                                                                                                                                                                                                                                                                                                                                                                                                                                                                                                                                                                                                                                                                                                                                                                                                                                                                                                                                                                                                                                                                                                                                                                                                                                                                                                                                                                                                                                                                | 2.104489 | 1.796719 | 2.937048 | 3.264572 |   |   |      |          |  |  |  |  |     |          |          |  |  |  |     |          |          |          |  |  |     |          |          |          |          |  |     |          |          |          |          |          |      |          |          |          |          |          |     |          |          |          |          |          |     |          |          |          |          |          |     |          |          |          |          |          |      |          |          |          |          |          |      |          |          |          |          |          |  |   |   |   |   |    |      |          |  |  |  |  |     |          |          |  |  |  |     |          |          |          |  |  |     |          |          |          |          |  |      |          |          |          |          |          |      |          |          |          |          |          |
| 11 N                                                                                                                                  | 2.974904                                                                                                                                                                                                                                                                                                                                                                                                                                                                                                                                                                                                                                                                                                                                                                                                                                                                                                                                                                                                                                                                                                                                                                                                                                                                                                                                                                                                                                                                                                                                                                                                                                                                                                                                                                                                                                                                                                                                                | 1.615259 | 1.637645 | 3.307199 | 2.743727 |   |   |      |          |  |  |  |  |     |          |          |  |  |  |     |          |          |          |  |  |     |          |          |          |          |  |     |          |          |          |          |          |      |          |          |          |          |          |     |          |          |          |          |          |     |          |          |          |          |          |     |          |          |          |          |          |      |          |          |          |          |          |      |          |          |          |          |          |  |   |   |   |   |    |      |          |  |  |  |  |     |          |          |  |  |  |     |          |          |          |  |  |     |          |          |          |          |  |      |          |          |          |          |          |      |          |          |          |          |          |
|                                                                                                                                       | 6                                                                                                                                                                                                                                                                                                                                                                                                                                                                                                                                                                                                                                                                                                                                                                                                                                                                                                                                                                                                                                                                                                                                                                                                                                                                                                                                                                                                                                                                                                                                                                                                                                                                                                                                                                                                                                                                                                                                                       | 7        | 8        | 9        | 10       |   |   |      |          |  |  |  |  |     |          |          |  |  |  |     |          |          |          |  |  |     |          |          |          |          |  |     |          |          |          |          |          |      |          |          |          |          |          |     |          |          |          |          |          |     |          |          |          |          |          |     |          |          |          |          |          |      |          |          |          |          |          |      |          |          |          |          |          |  |   |   |   |   |    |      |          |  |  |  |  |     |          |          |  |  |  |     |          |          |          |  |  |     |          |          |          |          |  |      |          |          |          |          |          |      |          |          |          |          |          |
| 6 B                                                                                                                                   | 0.000000                                                                                                                                                                                                                                                                                                                                                                                                                                                                                                                                                                                                                                                                                                                                                                                                                                                                                                                                                                                                                                                                                                                                                                                                                                                                                                                                                                                                                                                                                                                                                                                                                                                                                                                                                                                                                                                                                                                                                |          |          |          |          |   |   |      |          |  |  |  |  |     |          |          |  |  |  |     |          |          |          |  |  |     |          |          |          |          |  |     |          |          |          |          |          |      |          |          |          |          |          |     |          |          |          |          |          |     |          |          |          |          |          |     |          |          |          |          |          |      |          |          |          |          |          |      |          |          |          |          |          |  |   |   |   |   |    |      |          |  |  |  |  |     |          |          |  |  |  |     |          |          |          |  |  |     |          |          |          |          |  |      |          |          |          |          |          |      |          |          |          |          |          |
| 7 B                                                                                                                                   | 1.743079                                                                                                                                                                                                                                                                                                                                                                                                                                                                                                                                                                                                                                                                                                                                                                                                                                                                                                                                                                                                                                                                                                                                                                                                                                                                                                                                                                                                                                                                                                                                                                                                                                                                                                                                                                                                                                                                                                                                                | 0.000000 |          |          |          |   |   |      |          |  |  |  |  |     |          |          |  |  |  |     |          |          |          |  |  |     |          |          |          |          |  |     |          |          |          |          |          |      |          |          |          |          |          |     |          |          |          |          |          |     |          |          |          |          |          |     |          |          |          |          |          |      |          |          |          |          |          |      |          |          |          |          |          |  |   |   |   |   |    |      |          |  |  |  |  |     |          |          |  |  |  |     |          |          |          |  |  |     |          |          |          |          |  |      |          |          |          |          |          |      |          |          |          |          |          |
| 8 B                                                                                                                                   | 2.881647                                                                                                                                                                                                                                                                                                                                                                                                                                                                                                                                                                                                                                                                                                                                                                                                                                                                                                                                                                                                                                                                                                                                                                                                                                                                                                                                                                                                                                                                                                                                                                                                                                                                                                                                                                                                                                                                                                                                                | 2.981919 | 0.000000 |          |          |   |   |      |          |  |  |  |  |     |          |          |  |  |  |     |          |          |          |  |  |     |          |          |          |          |  |     |          |          |          |          |          |      |          |          |          |          |          |     |          |          |          |          |          |     |          |          |          |          |          |     |          |          |          |          |          |      |          |          |          |          |          |      |          |          |          |          |          |  |   |   |   |   |    |      |          |  |  |  |  |     |          |          |  |  |  |     |          |          |          |  |  |     |          |          |          |          |  |      |          |          |          |          |          |      |          |          |          |          |          |
| 9 B                                                                                                                                   | 1.803875                                                                                                                                                                                                                                                                                                                                                                                                                                                                                                                                                                                                                                                                                                                                                                                                                                                                                                                                                                                                                                                                                                                                                                                                                                                                                                                                                                                                                                                                                                                                                                                                                                                                                                                                                                                                                                                                                                                                                | 2.799046 | 2.936478 | 0.000000 |          |   |   |      |          |  |  |  |  |     |          |          |  |  |  |     |          |          |          |  |  |     |          |          |          |          |  |     |          |          |          |          |          |      |          |          |          |          |          |     |          |          |          |          |          |     |          |          |          |          |          |     |          |          |          |          |          |      |          |          |          |          |          |      |          |          |          |          |          |  |   |   |   |   |    |      |          |  |  |  |  |     |          |          |  |  |  |     |          |          |          |  |  |     |          |          |          |          |  |      |          |          |          |          |          |      |          |          |          |          |          |
| 10 B                                                                                                                                  | 2.822502                                                                                                                                                                                                                                                                                                                                                                                                                                                                                                                                                                                                                                                                                                                                                                                                                                                                                                                                                                                                                                                                                                                                                                                                                                                                                                                                                                                                                                                                                                                                                                                                                                                                                                                                                                                                                                                                                                                                                | 2.688934 | 3.139561 | 1.750990 | 0.000000 |   |   |      |          |  |  |  |  |     |          |          |  |  |  |     |          |          |          |  |  |     |          |          |          |          |  |     |          |          |          |          |          |      |          |          |          |          |          |     |          |          |          |          |          |     |          |          |          |          |          |     |          |          |          |          |          |      |          |          |          |          |          |      |          |          |          |          |          |  |   |   |   |   |    |      |          |  |  |  |  |     |          |          |  |  |  |     |          |          |          |  |  |     |          |          |          |          |  |      |          |          |          |          |          |      |          |          |          |          |          |
| 11 N                                                                                                                                  | 2.629844                                                                                                                                                                                                                                                                                                                                                                                                                                                                                                                                                                                                                                                                                                                                                                                                                                                                                                                                                                                                                                                                                                                                                                                                                                                                                                                                                                                                                                                                                                                                                                                                                                                                                                                                                                                                                                                                                                                                                | 1.558270 | 3.190107 | 2.621586 | 1.555155 |   |   |      |          |  |  |  |  |     |          |          |  |  |  |     |          |          |          |  |  |     |          |          |          |          |  |     |          |          |          |          |          |      |          |          |          |          |          |     |          |          |          |          |          |     |          |          |          |          |          |     |          |          |          |          |          |      |          |          |          |          |          |      |          |          |          |          |          |  |   |   |   |   |    |      |          |  |  |  |  |     |          |          |  |  |  |     |          |          |          |  |  |     |          |          |          |          |  |      |          |          |          |          |          |      |          |          |          |          |          |

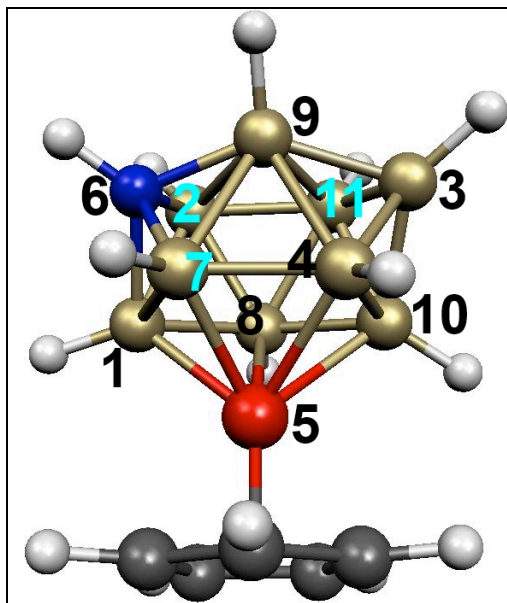

3. -1860.706413 +11.7 H/L 2.53 C<sub>1</sub>

|      | 1        | 2        | 3        | 4        | 5        |
|------|----------|----------|----------|----------|----------|
| 1 B  | 0.000000 |          |          |          |          |
| 2 B  | 1.783560 | 0.000000 |          |          |          |
| 3 B  | 3.642304 | 3.000211 | 0.000000 |          |          |
| 4 B  | 3.013705 | 3.251783 | 1.671601 | 0.000000 |          |
| 5 Co | 2.003427 | 3.176755 | 3.224218 | 2.066829 | 0.000000 |
| 6 N  | 1.653995 | 1.561734 | 3.137193 | 2.777509 | 2.956590 |
| 7 B  | 1.886874 | 2.683100 | 2.968263 | 1.807907 | 1.990577 |
| 8 B  | 1.747054 | 1.732589 | 2.865132 | 2.853140 | 2.099343 |
| 9 B  | 2.730152 | 2.003061 | 1.744858 | 2.004961 | 3.186658 |
| 10 B | 2.968241 | 2.910197 | 1.726216 | 1.806283 | 2.058688 |
| 11 B | 2.918812 | 1.774785 | 1.662778 | 2.655015 | 3.217087 |
|      | 6        | 7        | 8        | 9        | 10       |
| 6 N  | 0.000000 |          |          |          |          |
| 7 B  | 1.547115 | 0.000000 |          |          |          |
| 8 B  | 2.623413 | 2.821055 | 0.000000 |          |          |
| 9 B  | 1.590685 | 2.000968 | 2.764793 | 0.000000 |          |
| 10 B | 3.326825 | 2.910523 | 1.786555 | 2.650740 | 0.000000 |
| 11 B | 2.708484 | 3.175700 | 1.789990 | 1.902276 | 1.809807 |

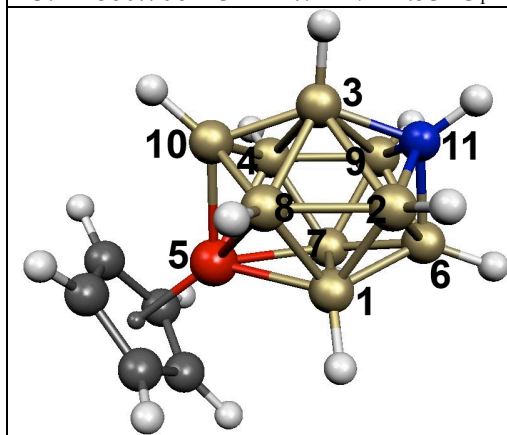

4. -1860.700713 +15.2 H/L 2.11 C<sub>s</sub>

|      | 1        | 2        | 3        | 4        | 5        |
|------|----------|----------|----------|----------|----------|
| 1 B  | 0.000000 |          |          |          |          |
| 2 B  | 1.732259 | 0.000000 |          |          |          |
| 3 B  | 2.794526 | 2.047392 | 0.000000 |          |          |
| 4 B  | 2.841493 | 3.208750 | 1.934693 | 0.000000 |          |
| 5 Co | 2.045546 | 3.273235 | 3.024188 | 2.090076 | 0.000000 |
| 6 B  | 1.762554 | 1.796157 | 2.734837 | 2.924635 | 3.283307 |
| 7 B  | 1.837900 | 2.814946 | 2.794616 | 1.788859 | 2.045589 |
| 8 B  | 1.788881 | 1.786755 | 1.934660 | 2.652100 | 2.090022 |
| 9 B  | 2.814968 | 2.678800 | 2.047765 | 1.786771 | 3.273325 |
| 10 B | 2.896367 | 3.011537 | 1.705694 | 1.688302 | 1.985117 |
| 11 N | 2.622780 | 1.551875 | 1.612217 | 2.710547 | 3.719104 |
|      | 6        | 7        | 8        | 9        | 10       |
| 6 B  | 0.000000 |          |          |          |          |
| 7 B  | 1.762553 | 0.000000 |          |          |          |
| 8 B  | 2.924737 | 2.841588 | 0.000000 |          |          |
| 9 B  | 1.796104 | 1.732198 | 3.209028 | 0.000000 |          |
| 10 B | 3.631198 | 2.896420 | 1.688253 | 3.011766 | 0.000000 |
| 11 N | 1.639231 | 2.622745 | 2.710738 | 1.551897 | 3.122841 |

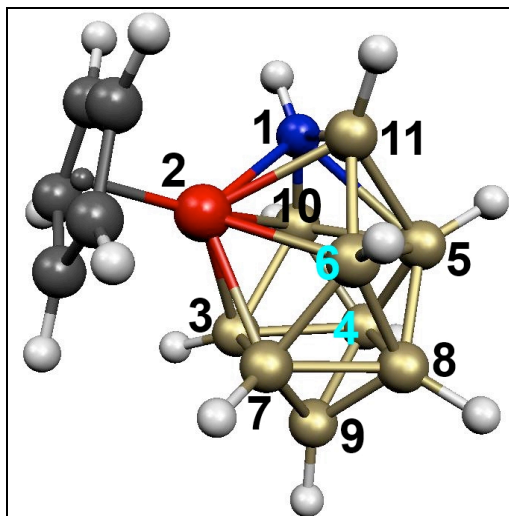

5. -1860.697318 +17.4 H/L 2.45 C<sub>1</sub>

|      | 1        | 2        | 3        | 4        | 5        |
|------|----------|----------|----------|----------|----------|
| 1 N  | 0.000000 |          |          |          |          |
| 2 Co | 1.993387 | 0.000000 |          |          |          |
| 3 B  | 2.914533 | 2.124200 | 0.000000 |          |          |
| 4 B  | 2.933040 | 3.204918 | 1.882330 | 0.000000 |          |
| 5 B  | 2.295795 | 2.972064 | 2.881533 | 1.748213 | 0.000000 |
| 6 B  | 2.674765 | 2.171784 | 2.813422 | 2.740472 | 1.749760 |
| 7 B  | 3.459164 | 2.179165 | 1.792548 | 2.562343 | 2.764258 |
| 8 B  | 3.577636 | 3.279653 | 2.588426 | 1.809103 | 1.731654 |
| 9 B  | 4.004481 | 3.342200 | 1.674303 | 1.704448 | 2.861946 |
| 10 B | 1.476144 | 2.264776 | 1.871357 | 1.771541 | 2.122618 |
| 11 B | 1.449613 | 2.153730 | 3.387273 | 3.204375 | 1.875564 |
|      | 6        | 7        | 8        | 9        | 10       |
| 6 B  | 0.000000 |          |          |          |          |
| 7 B  | 1.771047 | 0.000000 |          |          |          |
| 8 B  | 1.762706 | 1.804472 | 0.000000 |          |          |
| 9 B  | 2.881751 | 1.713973 | 1.688956 | 0.000000 |          |
| 10 B | 2.864213 | 2.998107 | 3.012749 | 2.948468 | 0.000000 |
| 11 B | 1.720838 | 3.143007 | 3.072264 | 4.030834 | 2.456600 |

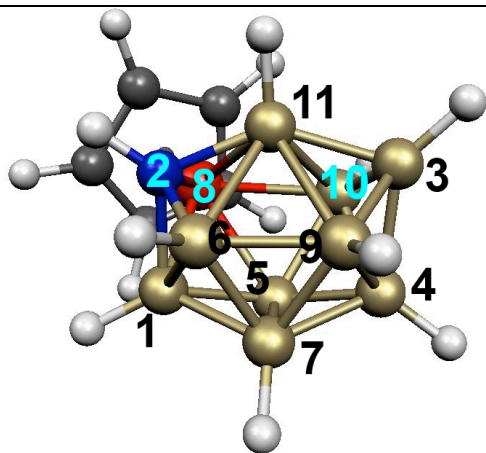

6. -1860.694856 +18.9 H/L 1.77 C<sub>1</sub>

|      | 1        | 2        | 3        | 4        | 5        |
|------|----------|----------|----------|----------|----------|
| 1 B  | 0.000000 |          |          |          |          |
| 2 N  | 1.626052 | 0.000000 |          |          |          |
| 3 B  | 3.579210 | 3.114997 | 0.000000 |          |          |
| 4 B  | 2.933030 | 3.343156 | 1.757434 | 0.000000 |          |
| 5 B  | 1.783619 | 2.691301 | 2.864049 | 1.766750 | 0.000000 |
| 6 B  | 1.824536 | 1.536509 | 2.923037 | 2.873529 | 2.826901 |
| 7 B  | 1.771393 | 2.627142 | 2.844628 | 1.755431 | 1.809818 |
| 8 Co | 2.072331 | 1.908443 | 3.390102 | 3.342713 | 2.077876 |
| 9 B  | 2.948669 | 2.776125 | 1.660149 | 1.769262 | 2.833245 |
| 10 B | 2.926145 | 2.800509 | 1.671653 | 1.797764 | 1.782873 |
| 11 B | 2.662473 | 1.575749 | 1.727883 | 2.665175 | 2.766968 |
|      | 6        | 7        | 8        | 9        | 10       |
| 6 B  | 0.000000 |          |          |          |          |
| 7 B  | 1.736284 | 0.000000 |          |          |          |
| 8 Co | 3.112779 | 3.246668 | 0.000000 |          |          |
| 9 B  | 1.788855 | 1.770937 | 3.733262 | 0.000000 |          |
| 10 B | 3.203399 | 2.813796 | 2.121600 | 2.661284 | 0.000000 |
| 11 B | 2.018394 | 2.785395 | 2.343388 | 2.055860 | 1.940647 |



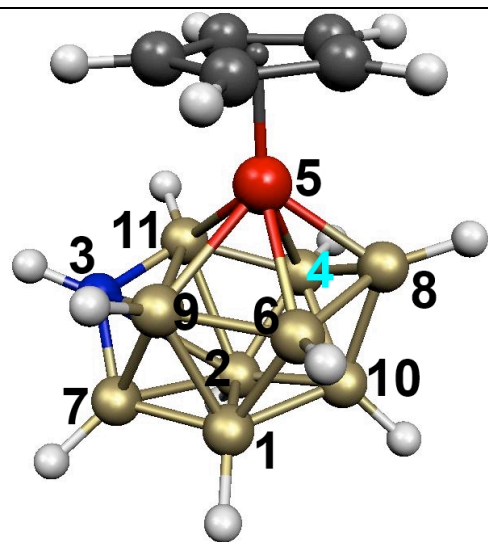

7. -1860.686559 +24.1 H/L 2.16 C<sub>1</sub>

|      | 1        | 2        | 3        | 4        | 5        |
|------|----------|----------|----------|----------|----------|
| 1 B  | 0.000000 |          |          |          |          |
| 2 B  | 1.747319 | 0.000000 |          |          |          |
| 3 N  | 2.611461 | 2.359893 | 0.000000 |          |          |
| 4 B  | 2.752879 | 1.732137 | 2.906003 | 0.000000 |          |
| 5 Co | 3.192750 | 3.208205 | 2.836054 | 2.170164 | 0.000000 |
| 6 B  | 1.763176 | 2.737068 | 3.176988 | 2.564855 | 2.054691 |
| 7 B  | 1.686765 | 1.915639 | 1.447774 | 3.192806 | 3.564108 |
| 8 B  | 2.920006 | 2.893910 | 3.880236 | 1.746079 | 1.924975 |
| 9 B  | 1.895095 | 2.660247 | 1.703292 | 2.914670 | 2.103614 |
| 10 B | 1.741252 | 1.752797 | 3.515726 | 1.821480 | 2.948479 |
| 11 B | 2.939356 | 2.064577 | 1.499350 | 1.720526 | 2.088295 |
|      | 6        | 7        | 8        | 9        | 10       |
| 6 B  | 0.000000 |          |          |          |          |
| 7 B  | 2.992521 | 0.000000 |          |          |          |
| 8 B  | 1.757798 | 4.004451 | 0.000000 |          |          |
| 9 B  | 1.782042 | 1.900990 | 3.036694 | 0.000000 |          |
| 10 B | 1.805896 | 3.056907 | 1.710599 | 2.891794 | 0.000000 |
| 11 B | 3.026132 | 2.467361 | 2.991067 | 2.261355 | 3.015826 |

Table S4C. Energy ranking for all of the CpCoNHB<sub>9</sub>H<sub>9</sub> optimized structures:

| No | Initial structure        | Final energy (a.u.) | $\Delta E$ ( kcal/mol) |
|----|--------------------------|---------------------|------------------------|
| 1  | TricapCubeA-Co3-h        | -1860.5406611       | 0.00                   |
| 2  | Icos-1vx-Co4-a           | -1860.5406607       | 0.00                   |
| 3  | TricapCubeB-Co5-d        | -1860.5406601       | 0.00                   |
| 4  | Icos-1vx-Co1-a_r-50      | -1860.5406600       | 0.00                   |
| 5  | Icos-1vx-Co2-a           | -1860.5406600       | 0.00                   |
| 6  | Icos-1vx-Co5-g           | -1860.5406600       | 0.00                   |
| 7  | TricapCubeA-Co3-b        | -1860.5406600       | 0.00                   |
| 8  | Icos-1vx-Co3-f           | -1860.5406597       | 0.00                   |
| 9  | TricapCubeB-Co5-a        | -1860.5406588       | 0.00                   |
| 10 | TricapCubeA-Co1-a        | -1860.5406575       | 0.00                   |
| 11 | TricapCubeB-Co3-a        | -1860.5406506       | 0.01                   |
| 12 | Icos-1vx-Co1-a_i-50      | -1860.5391627       | 0.94                   |
| 13 | TricapCubeB-Co1-b        | -1860.5310072       | 6.06                   |
| 14 | TricapCubeB-Co4-e        | -1860.5310024       | 6.06                   |
| 15 | TricapCubeB-Co5-f        | -1860.5310013       | 6.06                   |
| 16 | TricapCubeA-Co3-f        | -1860.5310006       | 6.06                   |
| 17 | Icos-1vx-Co1-c           | -1860.5310003       | 6.06                   |
| 18 | TricapCubeA-Co3-i        | -1860.5310000       | 6.06                   |
| 19 | TricapCubeB-Co3-d        | -1860.5309995       | 6.06                   |
| 20 | TricapCubeA-Co2-h        | -1860.5309989       | 6.06                   |
| 21 | TricapCubeA-Co3-j        | -1860.5309973       | 6.06                   |
| 22 | Icos-1vx-Co4-b_r-71      | -1860.5309970       | 6.06                   |
| 23 | TricapCubeA-Co2-g        | -1860.5309967       | 6.06                   |
| 24 | OhfusettoPentBipyr-Co4-h | -1860.5309965       | 6.06                   |
| 25 | TricapCubeA-Co3-a        | -1860.5309949       | 6.07                   |
| 26 | Icos-1vx-Co4-e           | -1860.5309948       | 6.07                   |
| 27 | TricapCubeB-Co5-g        | -1860.5309947       | 6.07                   |
| 28 | Icos-1vx-Co5-e           | -1860.5309942       | 6.07                   |
| 29 | Icos-1vx-Co2-f           | -1860.5309940       | 6.07                   |
| 30 | TricapCubeA-Co2-e        | -1860.5309935       | 6.07                   |
| 31 | Icos-1vx-Co2-b           | -1860.5309932       | 6.07                   |
| 32 | TricapCubeB-Co3-b        | -1860.5309919       | 6.07                   |
| 33 | PentaCapTrPr-Co2-b       | -1860.5309912       | 6.07                   |
| 34 | TricapCubeB-Co2-a        | -1860.5309657       | 6.08                   |
| 35 | TricapCubeB-Co4-a        | -1860.5309657       | 6.08                   |
| 36 | Icos-1vx-Co4-f           | -1860.5309649       | 6.08                   |
| 37 | Icos-1vx-Co5-f           | -1860.5309643       | 6.08                   |
| 38 | PentaCapTrPr-Co1-a       | -1860.5309639       | 6.09                   |
| 39 | TricapCubeB-Co1-d        | -1860.5309639       | 6.09                   |
| 40 | TricapCubeB-Co4-g        | -1860.5309639       | 6.09                   |
| 41 | Icos-1vx-Co5-a           | -1860.5309635       | 6.09                   |

|    |                                |               |       |
|----|--------------------------------|---------------|-------|
| 42 | TricapCubeA-Co3-c              | -1860.5309618 | 6.09  |
| 43 | TricapCubeB-Co2-g              | -1860.5309618 | 6.09  |
| 44 | TricapCubeA-Co2-a              | -1860.5309602 | 6.09  |
| 45 | TricapCubeB-Co1-a              | -1860.5309601 | 6.09  |
| 46 | Icos-1vx-Co2-g_r-45            | -1860.5285598 | 7.59  |
| 47 | Icos-1vx-Co2-g_i-45            | -1860.5280759 | 7.90  |
| 48 | Icos-1vx-Co3-d                 | -1860.5219858 | 11.72 |
| 49 | TricapCubeA-Co3-d              | -1860.5219838 | 11.72 |
| 50 | TricapCubeA-Co2-c              | -1860.5219833 | 11.72 |
| 51 | TricapCubeA-Co1-b              | -1860.5219832 | 11.72 |
| 52 | Icos-1vx-Co2-d                 | -1860.5219829 | 11.72 |
| 53 | TricapCubeA-Co1-c              | -1860.5219827 | 11.72 |
| 54 | TricapCubeA-Co3-e              | -1860.5219825 | 11.72 |
| 55 | Icos-1vx-Co5-b_r-257           | -1860.5219817 | 11.72 |
| 56 | Icos-1vx-Co5-d_r-42            | -1860.5219816 | 11.72 |
| 57 | OhfusettoPentBipyr-Co3-g       | -1860.5219815 | 11.72 |
| 58 | Icos-1vx-Co3-e                 | -1860.5219813 | 11.72 |
| 59 | TricapCubeB-Co5-b              | -1860.5219811 | 11.72 |
| 60 | OhfusettoPentBipyr-Co2-c_r-154 | -1860.5219803 | 11.72 |
| 61 | Icos-1vx-Co3-b_r-227           | -1860.5172348 | 14.70 |
| 62 | TricapCubeA-Co3-g              | -1860.5172340 | 14.70 |
| 63 | TricapCubeA-Co2-j              | -1860.5172334 | 14.70 |
| 64 | Icos-1vx-Co2-c                 | -1860.5172324 | 14.70 |
| 65 | Icos-1vx-Co5-c                 | -1860.5172320 | 14.70 |
| 66 | Icos-1vx-Co2-e                 | -1860.5138809 | 16.81 |
| 67 | Icos-1vx-Co3-c                 | -1860.5138715 | 16.81 |
| 68 | TricapCubeB-Co4-f              | -1860.5138698 | 16.81 |
| 69 | OhfusettoPentBipyr-Co3-a       | -1860.5138667 | 16.81 |
| 70 | OhfusettoPentBipyr-Co4-a       | -1860.5138659 | 16.81 |
| 71 | TricapCubeA-Co2-b              | -1860.5138657 | 16.81 |
| 72 | TricapCubeB-Co2-f              | -1860.5138645 | 16.82 |
| 73 | TricapCubeA-Co2-d              | -1860.5134735 | 17.06 |
| 74 | OhfusettoPentBipyr-Co1-e       | -1860.5134715 | 17.06 |
| 75 | OhfusettoPentBipyr-Co3-b       | -1860.5077135 | 20.68 |
| 76 | TricapCubeB-Co2-e              | -1860.5077135 | 20.68 |
| 77 | TricapCubeA-Co2-f              | -1860.5077124 | 20.68 |
| 78 | OhfusettoPentBipyr-Co2-g       | -1860.5075895 | 20.75 |
| 79 | PentaCapTrPr-Co1-c             | -1860.5068186 | 21.24 |
| 80 | OhfusettoPentBipyr-Co4-b       | -1860.5068166 | 21.24 |
| 81 | Icos-1vx-Co4-b_i-71            | -1860.5067825 | 21.26 |
| 82 | PentaCapTrPr-Co2-c             | -1860.5030906 | 23.58 |
| 83 | TricapCubeB-Co5-c              | -1860.5027503 | 23.79 |
| 84 | TricapCubeB-Co2-c              | -1860.5027492 | 23.79 |
| 85 | TricapCubeB-Co4-c              | -1860.5027417 | 23.80 |

|     |                               |               |       |
|-----|-------------------------------|---------------|-------|
| 86  | OhfusetopentBipyr-Co1-f       | -1860.4990624 | 26.10 |
| 87  | OhfusetopentBipyr-Co2-e       | -1860.4990582 | 26.11 |
| 88  | TricapCubeB-Co1-c             | -1860.4936402 | 29.51 |
| 89  | TricapCubeB-Co3-c             | -1860.4936272 | 29.51 |
| 90  | PentaCapTrPr-Co2-a            | -1860.4921287 | 30.46 |
| 91  | Icos-1vx-Co1-b_r-230          | -1860.4882015 | 32.92 |
| 92  | TricapCubeA-Co2-i             | -1860.4881999 | 32.92 |
| 93  | PentaCapTrPr-Co1-d            | -1860.4881994 | 32.92 |
| 94  | OhfusetopentBipyr-Co3-d_r-91  | -1860.4826198 | 36.42 |
| 95  | OhfusetopentBipyr-Co2-b_r-240 | -1860.4761814 | 40.46 |
| 96  | Icos-1vx-Co4-d                | -1860.4745088 | 41.51 |
| 97  | Icos-1vx-Co2-j                | -1860.4745073 | 41.51 |
| 98  | OhfusetopentBipyr-Co4-c_r-76  | -1860.4740844 | 41.78 |
| 99  | Icos-1vx-Co3-a                | -1860.4722010 | 42.96 |
| 100 | PentaCapTrPr-Co2-d            | -1860.4718086 | 43.21 |
| 101 | Icos-1vx-Co1-d                | -1860.4718076 | 43.21 |
| 102 | PentaCapTrPr-Co1-g            | -1860.4716112 | 43.33 |
| 103 | TricapCubeB-Co2-d             | -1860.4693993 | 44.72 |
| 104 | TricapCubeB-Co4-d             | -1860.4693991 | 44.72 |
| 105 | Icos-1vx-Co3-b_i-227          | -1860.4690599 | 44.93 |
| 106 | OhfusetopentBipyr-Co2-d       | -1860.4687048 | 45.15 |
| 107 | TricapCubeB-Co2-b             | -1860.4683952 | 45.35 |
| 108 | TricapCubeB-Co4-b             | -1860.4683950 | 45.35 |
| 109 | TricapCubeB-Co5-e             | -1860.4683925 | 45.35 |
| 110 | Icos-1vx-Co2-i                | -1860.4683912 | 45.35 |
| 111 | Icos-1vx-Co2-h                | -1860.4680749 | 45.55 |
| 112 | Icos-1vx-Co4-g                | -1860.4646284 | 47.71 |
| 113 | Icos-1vx-Co5-d_i-42           | -1860.4631972 | 48.61 |
| 114 | Icos-1vx-Co1-b_i-230          | -1860.4627761 | 48.87 |
| 115 | PentaCapTrPr-Co1-e            | -1860.4590089 | 51.24 |
| 116 | OhfusetopentBipyr-Co4-g       | -1860.4564120 | 52.87 |
| 117 | Icos-1vx-Co5-b_i-257          | -1860.4564027 | 52.87 |
| 118 | PentaCapTrPr-Co1-f            | -1860.4556611 | 53.34 |
| 119 | Icos-1vx-Co4-c                | -1860.4544672 | 54.09 |
| 120 | OhfusetopentBipyr-Co3-h       | -1860.4499662 | 56.91 |
| 121 | OhfusetopentBipyr-Co1-b_r-228 | -1860.4440236 | 60.64 |
| 122 | OhfusetopentBipyr-Co1-c       | -1860.4381062 | 64.36 |
| 123 | OhfusetopentBipyr-Co4-d       | -1860.4323636 | 67.96 |
| 124 | PentaCapTrPr-Co1-b            | -1860.4282043 | 70.57 |
| 125 | OhfusetopentBipyr-Co1-g       | -1860.4276778 | 70.90 |
| 126 | OhfusetopentBipyr-Co2-f       | -1860.4229047 | 73.89 |
| 127 | OhfusetopentBipyr-Co3-d_i-91  | -1860.4204911 | 75.41 |
| 128 | OhfusetopentBipyr-Co2-b_i-240 | -1860.4204338 | 75.45 |
| 129 | OhfusetopentBipyr-Co4-e       | -1860.4127011 | 80.30 |

|     |                                |               |        |
|-----|--------------------------------|---------------|--------|
| 130 | OhfusettoPentBipyr-Co3-e       | -1860.4121568 | 80.64  |
| 131 | OhfusettoPentBipyr-Co3-c       | -1860.4093826 | 82.38  |
| 132 | OhfusettoPentBipyr-Co4-f_r-71  | -1860.4051838 | 85.01  |
| 133 | OhfusettoPentBipyr-Co3-f       | -1860.4051798 | 85.02  |
| 134 | OhfusettoPentBipyr-Co4-f_i-71  | -1860.4045545 | 85.41  |
| 135 | OhfusettoPentBipyr-Co4-c_i-76  | -1860.3957089 | 90.96  |
| 136 | OhfusettoPentBipyr-Co1-b_i-228 | -1860.3945489 | 91.69  |
| 137 | OhfusettoPentBipyr-Co1-a       | -1860.3887076 | 95.35  |
| 138 | OhfusettoPentBipyr-Co2-a       | -1860.3829102 | 98.99  |
| 139 | OhfusettoPentBipyr-Co1-d       | -1860.3806208 | 100.43 |
| 140 | OhfusettoPentBipyr-Co2-c_i-154 | -1860.3545716 | 116.77 |

Table S5A. Initial CpCoNHB<sub>10</sub>H<sub>10</sub> structures, 35 in all.

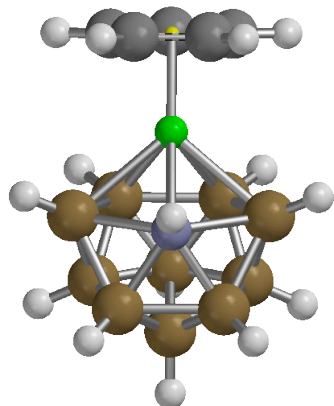

Icosahedron 3

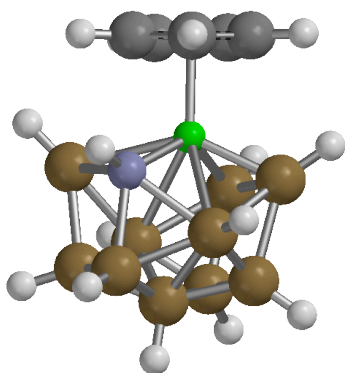

Cubeoctahedron 20

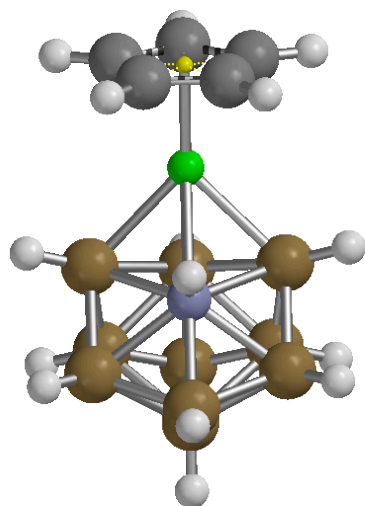

Anticubeoctahedron 12

Table S5B. Distance table for the lowest-lying CpCoNHB<sub>10</sub>H<sub>10</sub> structures after M06L/6-311G(d,p) optimization. Included are the ZPcorrected E (a.u.), relative energy (kcal/mol), HOMO/LUMO gaps (eV) and symmetry.

| 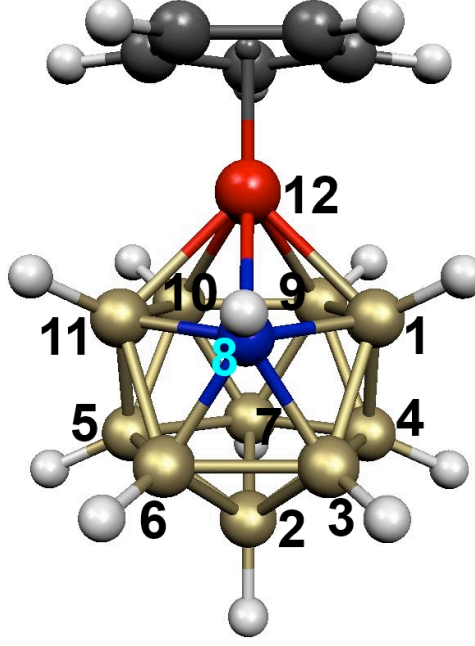 <p>1. -1886.206878 0.0 H/L 2.68 C<sub>s</sub></p>    | <table border="1"> <thead> <tr> <th></th> <th>1</th> <th>2</th> <th>3</th> <th>4</th> <th>5</th> </tr> </thead> <tbody> <tr><td>1 B</td><td>0.000000</td><td></td><td></td><td></td><td></td></tr> <tr><td>2 B</td><td>2.859943</td><td>0.000000</td><td></td><td></td><td></td></tr> <tr><td>3 B</td><td>1.798982</td><td>1.747438</td><td>0.000000</td><td></td><td></td></tr> <tr><td>4 B</td><td>1.742069</td><td>1.772849</td><td>1.746139</td><td>0.000000</td><td></td></tr> <tr><td>5 B</td><td>3.354216</td><td>1.772787</td><td>2.851775</td><td>2.867700</td><td>0.000000</td></tr> <tr><td>6 B</td><td>2.883472</td><td>1.747436</td><td>1.772600</td><td>2.851715</td><td>1.746234</td></tr> <tr><td>7 B</td><td>2.841228</td><td>1.759097</td><td>2.842484</td><td>1.773133</td><td>1.773037</td></tr> <tr><td>8 N</td><td>1.693648</td><td>2.680558</td><td>1.680066</td><td>2.677772</td><td>2.677811</td></tr> <tr><td>9 B</td><td>1.777896</td><td>2.877156</td><td>2.895905</td><td>1.780958</td><td>2.874040</td></tr> <tr><td>10 B</td><td>2.871372</td><td>2.877163</td><td>3.395885</td><td>2.874092</td><td>1.780956</td></tr> <tr><td>11 B</td><td>2.865000</td><td>2.859990</td><td>2.883659</td><td>3.354261</td><td>1.742153</td></tr> <tr><td>12 Co</td><td>2.059489</td><td>3.848910</td><td>3.304458</td><td>3.275017</td><td>3.275015</td></tr> <tr> <td></td> <td>6</td> <td>7</td> <td>8</td> <td>9</td> <td>10</td> </tr> <tr><td>6 B</td><td>0.000000</td><td></td><td></td><td></td><td></td></tr> <tr><td>7 B</td><td>2.842470</td><td>0.000000</td><td></td><td></td><td></td></tr> <tr><td>8 N</td><td>1.679951</td><td>3.157153</td><td>0.000000</td><td></td><td></td></tr> <tr><td>9 B</td><td>3.395772</td><td>1.765183</td><td>2.738788</td><td>0.000000</td><td></td></tr> <tr><td>10 B</td><td>2.895934</td><td>1.765145</td><td>2.738861</td><td>1.774400</td><td>0.000000</td></tr> <tr><td>11 B</td><td>1.799046</td><td>2.841220</td><td>1.693718</td><td>2.871309</td><td>1.777909</td></tr> <tr><td>12 Co</td><td>3.304358</td><td>3.282449</td><td>2.027482</td><td>2.088118</td><td>2.088159</td></tr> <tr> <td></td> <td>11</td> <td>12</td> <td></td> <td></td> <td></td> </tr> <tr><td>11 B</td><td>0.000000</td><td></td><td></td><td></td><td></td></tr> <tr><td>12 Co</td><td>2.059418</td><td>0.000000</td><td></td><td></td><td></td></tr> </tbody> </table> |          | 1        | 2        | 3        | 4 | 5 | 1 B | 0.000000 |  |  |  |  | 2 B | 2.859943 | 0.000000 |  |  |  | 3 B | 1.798982 | 1.747438 | 0.000000 |  |  | 4 B | 1.742069 | 1.772849 | 1.746139 | 0.000000 |  | 5 B | 3.354216 | 1.772787 | 2.851775 | 2.867700 | 0.000000 | 6 B | 2.883472 | 1.747436 | 1.772600 | 2.851715 | 1.746234 | 7 B | 2.841228 | 1.759097 | 2.842484 | 1.773133 | 1.773037 | 8 N | 1.693648 | 2.680558 | 1.680066 | 2.677772 | 2.677811 | 9 B | 1.777896 | 2.877156 | 2.895905 | 1.780958 | 2.874040 | 10 B | 2.871372 | 2.877163 | 3.395885 | 2.874092 | 1.780956 | 11 B  | 2.865000 | 2.859990 | 2.883659 | 3.354261 | 1.742153 | 12 Co | 2.059489 | 3.848910 | 3.304458 | 3.275017 | 3.275015 |  | 6 | 7 | 8 | 9 | 10 | 6 B | 0.000000 |  |  |  |  | 7 B | 2.842470 | 0.000000 |  |  |  | 8 N | 1.679951 | 3.157153 | 0.000000 |  |  | 9 B | 3.395772 | 1.765183 | 2.738788 | 0.000000 |  | 10 B | 2.895934 | 1.765145 | 2.738861 | 1.774400 | 0.000000 | 11 B  | 1.799046 | 2.841220 | 1.693718 | 2.871309 | 1.777909 | 12 Co | 3.304358 | 3.282449 | 2.027482 | 2.088118 | 2.088159 |  | 11 | 12 |  |  |  | 11 B  | 0.000000 |  |  |  |  | 12 Co | 2.059418 | 0.000000 |  |  |  |
|----------------------------------------------------------------------------------------------------------------------------------------|-----------------------------------------------------------------------------------------------------------------------------------------------------------------------------------------------------------------------------------------------------------------------------------------------------------------------------------------------------------------------------------------------------------------------------------------------------------------------------------------------------------------------------------------------------------------------------------------------------------------------------------------------------------------------------------------------------------------------------------------------------------------------------------------------------------------------------------------------------------------------------------------------------------------------------------------------------------------------------------------------------------------------------------------------------------------------------------------------------------------------------------------------------------------------------------------------------------------------------------------------------------------------------------------------------------------------------------------------------------------------------------------------------------------------------------------------------------------------------------------------------------------------------------------------------------------------------------------------------------------------------------------------------------------------------------------------------------------------------------------------------------------------------------------------------------------------------------------------------------------------------------------------------------------------------------------------------------------------------------------------------------------------------------------------------------------------------------------------------------------------------------------------------------------------------------------------------------------------------------------------------------------------------------------------------------------------------------------------------------------------------------------------------------------------------|----------|----------|----------|----------|---|---|-----|----------|--|--|--|--|-----|----------|----------|--|--|--|-----|----------|----------|----------|--|--|-----|----------|----------|----------|----------|--|-----|----------|----------|----------|----------|----------|-----|----------|----------|----------|----------|----------|-----|----------|----------|----------|----------|----------|-----|----------|----------|----------|----------|----------|-----|----------|----------|----------|----------|----------|------|----------|----------|----------|----------|----------|-------|----------|----------|----------|----------|----------|-------|----------|----------|----------|----------|----------|--|---|---|---|---|----|-----|----------|--|--|--|--|-----|----------|----------|--|--|--|-----|----------|----------|----------|--|--|-----|----------|----------|----------|----------|--|------|----------|----------|----------|----------|----------|-------|----------|----------|----------|----------|----------|-------|----------|----------|----------|----------|----------|--|----|----|--|--|--|-------|----------|--|--|--|--|-------|----------|----------|--|--|--|
|                                                                                                                                        | 1                                                                                                                                                                                                                                                                                                                                                                                                                                                                                                                                                                                                                                                                                                                                                                                                                                                                                                                                                                                                                                                                                                                                                                                                                                                                                                                                                                                                                                                                                                                                                                                                                                                                                                                                                                                                                                                                                                                                                                                                                                                                                                                                                                                                                                                                                                                                                                                                                           | 2        | 3        | 4        | 5        |   |   |     |          |  |  |  |  |     |          |          |  |  |  |     |          |          |          |  |  |     |          |          |          |          |  |     |          |          |          |          |          |     |          |          |          |          |          |     |          |          |          |          |          |     |          |          |          |          |          |     |          |          |          |          |          |      |          |          |          |          |          |       |          |          |          |          |          |       |          |          |          |          |          |  |   |   |   |   |    |     |          |  |  |  |  |     |          |          |  |  |  |     |          |          |          |  |  |     |          |          |          |          |  |      |          |          |          |          |          |       |          |          |          |          |          |       |          |          |          |          |          |  |    |    |  |  |  |       |          |  |  |  |  |       |          |          |  |  |  |
| 1 B                                                                                                                                    | 0.000000                                                                                                                                                                                                                                                                                                                                                                                                                                                                                                                                                                                                                                                                                                                                                                                                                                                                                                                                                                                                                                                                                                                                                                                                                                                                                                                                                                                                                                                                                                                                                                                                                                                                                                                                                                                                                                                                                                                                                                                                                                                                                                                                                                                                                                                                                                                                                                                                                    |          |          |          |          |   |   |     |          |  |  |  |  |     |          |          |  |  |  |     |          |          |          |  |  |     |          |          |          |          |  |     |          |          |          |          |          |     |          |          |          |          |          |     |          |          |          |          |          |     |          |          |          |          |          |     |          |          |          |          |          |      |          |          |          |          |          |       |          |          |          |          |          |       |          |          |          |          |          |  |   |   |   |   |    |     |          |  |  |  |  |     |          |          |  |  |  |     |          |          |          |  |  |     |          |          |          |          |  |      |          |          |          |          |          |       |          |          |          |          |          |       |          |          |          |          |          |  |    |    |  |  |  |       |          |  |  |  |  |       |          |          |  |  |  |
| 2 B                                                                                                                                    | 2.859943                                                                                                                                                                                                                                                                                                                                                                                                                                                                                                                                                                                                                                                                                                                                                                                                                                                                                                                                                                                                                                                                                                                                                                                                                                                                                                                                                                                                                                                                                                                                                                                                                                                                                                                                                                                                                                                                                                                                                                                                                                                                                                                                                                                                                                                                                                                                                                                                                    | 0.000000 |          |          |          |   |   |     |          |  |  |  |  |     |          |          |  |  |  |     |          |          |          |  |  |     |          |          |          |          |  |     |          |          |          |          |          |     |          |          |          |          |          |     |          |          |          |          |          |     |          |          |          |          |          |     |          |          |          |          |          |      |          |          |          |          |          |       |          |          |          |          |          |       |          |          |          |          |          |  |   |   |   |   |    |     |          |  |  |  |  |     |          |          |  |  |  |     |          |          |          |  |  |     |          |          |          |          |  |      |          |          |          |          |          |       |          |          |          |          |          |       |          |          |          |          |          |  |    |    |  |  |  |       |          |  |  |  |  |       |          |          |  |  |  |
| 3 B                                                                                                                                    | 1.798982                                                                                                                                                                                                                                                                                                                                                                                                                                                                                                                                                                                                                                                                                                                                                                                                                                                                                                                                                                                                                                                                                                                                                                                                                                                                                                                                                                                                                                                                                                                                                                                                                                                                                                                                                                                                                                                                                                                                                                                                                                                                                                                                                                                                                                                                                                                                                                                                                    | 1.747438 | 0.000000 |          |          |   |   |     |          |  |  |  |  |     |          |          |  |  |  |     |          |          |          |  |  |     |          |          |          |          |  |     |          |          |          |          |          |     |          |          |          |          |          |     |          |          |          |          |          |     |          |          |          |          |          |     |          |          |          |          |          |      |          |          |          |          |          |       |          |          |          |          |          |       |          |          |          |          |          |  |   |   |   |   |    |     |          |  |  |  |  |     |          |          |  |  |  |     |          |          |          |  |  |     |          |          |          |          |  |      |          |          |          |          |          |       |          |          |          |          |          |       |          |          |          |          |          |  |    |    |  |  |  |       |          |  |  |  |  |       |          |          |  |  |  |
| 4 B                                                                                                                                    | 1.742069                                                                                                                                                                                                                                                                                                                                                                                                                                                                                                                                                                                                                                                                                                                                                                                                                                                                                                                                                                                                                                                                                                                                                                                                                                                                                                                                                                                                                                                                                                                                                                                                                                                                                                                                                                                                                                                                                                                                                                                                                                                                                                                                                                                                                                                                                                                                                                                                                    | 1.772849 | 1.746139 | 0.000000 |          |   |   |     |          |  |  |  |  |     |          |          |  |  |  |     |          |          |          |  |  |     |          |          |          |          |  |     |          |          |          |          |          |     |          |          |          |          |          |     |          |          |          |          |          |     |          |          |          |          |          |     |          |          |          |          |          |      |          |          |          |          |          |       |          |          |          |          |          |       |          |          |          |          |          |  |   |   |   |   |    |     |          |  |  |  |  |     |          |          |  |  |  |     |          |          |          |  |  |     |          |          |          |          |  |      |          |          |          |          |          |       |          |          |          |          |          |       |          |          |          |          |          |  |    |    |  |  |  |       |          |  |  |  |  |       |          |          |  |  |  |
| 5 B                                                                                                                                    | 3.354216                                                                                                                                                                                                                                                                                                                                                                                                                                                                                                                                                                                                                                                                                                                                                                                                                                                                                                                                                                                                                                                                                                                                                                                                                                                                                                                                                                                                                                                                                                                                                                                                                                                                                                                                                                                                                                                                                                                                                                                                                                                                                                                                                                                                                                                                                                                                                                                                                    | 1.772787 | 2.851775 | 2.867700 | 0.000000 |   |   |     |          |  |  |  |  |     |          |          |  |  |  |     |          |          |          |  |  |     |          |          |          |          |  |     |          |          |          |          |          |     |          |          |          |          |          |     |          |          |          |          |          |     |          |          |          |          |          |     |          |          |          |          |          |      |          |          |          |          |          |       |          |          |          |          |          |       |          |          |          |          |          |  |   |   |   |   |    |     |          |  |  |  |  |     |          |          |  |  |  |     |          |          |          |  |  |     |          |          |          |          |  |      |          |          |          |          |          |       |          |          |          |          |          |       |          |          |          |          |          |  |    |    |  |  |  |       |          |  |  |  |  |       |          |          |  |  |  |
| 6 B                                                                                                                                    | 2.883472                                                                                                                                                                                                                                                                                                                                                                                                                                                                                                                                                                                                                                                                                                                                                                                                                                                                                                                                                                                                                                                                                                                                                                                                                                                                                                                                                                                                                                                                                                                                                                                                                                                                                                                                                                                                                                                                                                                                                                                                                                                                                                                                                                                                                                                                                                                                                                                                                    | 1.747436 | 1.772600 | 2.851715 | 1.746234 |   |   |     |          |  |  |  |  |     |          |          |  |  |  |     |          |          |          |  |  |     |          |          |          |          |  |     |          |          |          |          |          |     |          |          |          |          |          |     |          |          |          |          |          |     |          |          |          |          |          |     |          |          |          |          |          |      |          |          |          |          |          |       |          |          |          |          |          |       |          |          |          |          |          |  |   |   |   |   |    |     |          |  |  |  |  |     |          |          |  |  |  |     |          |          |          |  |  |     |          |          |          |          |  |      |          |          |          |          |          |       |          |          |          |          |          |       |          |          |          |          |          |  |    |    |  |  |  |       |          |  |  |  |  |       |          |          |  |  |  |
| 7 B                                                                                                                                    | 2.841228                                                                                                                                                                                                                                                                                                                                                                                                                                                                                                                                                                                                                                                                                                                                                                                                                                                                                                                                                                                                                                                                                                                                                                                                                                                                                                                                                                                                                                                                                                                                                                                                                                                                                                                                                                                                                                                                                                                                                                                                                                                                                                                                                                                                                                                                                                                                                                                                                    | 1.759097 | 2.842484 | 1.773133 | 1.773037 |   |   |     |          |  |  |  |  |     |          |          |  |  |  |     |          |          |          |  |  |     |          |          |          |          |  |     |          |          |          |          |          |     |          |          |          |          |          |     |          |          |          |          |          |     |          |          |          |          |          |     |          |          |          |          |          |      |          |          |          |          |          |       |          |          |          |          |          |       |          |          |          |          |          |  |   |   |   |   |    |     |          |  |  |  |  |     |          |          |  |  |  |     |          |          |          |  |  |     |          |          |          |          |  |      |          |          |          |          |          |       |          |          |          |          |          |       |          |          |          |          |          |  |    |    |  |  |  |       |          |  |  |  |  |       |          |          |  |  |  |
| 8 N                                                                                                                                    | 1.693648                                                                                                                                                                                                                                                                                                                                                                                                                                                                                                                                                                                                                                                                                                                                                                                                                                                                                                                                                                                                                                                                                                                                                                                                                                                                                                                                                                                                                                                                                                                                                                                                                                                                                                                                                                                                                                                                                                                                                                                                                                                                                                                                                                                                                                                                                                                                                                                                                    | 2.680558 | 1.680066 | 2.677772 | 2.677811 |   |   |     |          |  |  |  |  |     |          |          |  |  |  |     |          |          |          |  |  |     |          |          |          |          |  |     |          |          |          |          |          |     |          |          |          |          |          |     |          |          |          |          |          |     |          |          |          |          |          |     |          |          |          |          |          |      |          |          |          |          |          |       |          |          |          |          |          |       |          |          |          |          |          |  |   |   |   |   |    |     |          |  |  |  |  |     |          |          |  |  |  |     |          |          |          |  |  |     |          |          |          |          |  |      |          |          |          |          |          |       |          |          |          |          |          |       |          |          |          |          |          |  |    |    |  |  |  |       |          |  |  |  |  |       |          |          |  |  |  |
| 9 B                                                                                                                                    | 1.777896                                                                                                                                                                                                                                                                                                                                                                                                                                                                                                                                                                                                                                                                                                                                                                                                                                                                                                                                                                                                                                                                                                                                                                                                                                                                                                                                                                                                                                                                                                                                                                                                                                                                                                                                                                                                                                                                                                                                                                                                                                                                                                                                                                                                                                                                                                                                                                                                                    | 2.877156 | 2.895905 | 1.780958 | 2.874040 |   |   |     |          |  |  |  |  |     |          |          |  |  |  |     |          |          |          |  |  |     |          |          |          |          |  |     |          |          |          |          |          |     |          |          |          |          |          |     |          |          |          |          |          |     |          |          |          |          |          |     |          |          |          |          |          |      |          |          |          |          |          |       |          |          |          |          |          |       |          |          |          |          |          |  |   |   |   |   |    |     |          |  |  |  |  |     |          |          |  |  |  |     |          |          |          |  |  |     |          |          |          |          |  |      |          |          |          |          |          |       |          |          |          |          |          |       |          |          |          |          |          |  |    |    |  |  |  |       |          |  |  |  |  |       |          |          |  |  |  |
| 10 B                                                                                                                                   | 2.871372                                                                                                                                                                                                                                                                                                                                                                                                                                                                                                                                                                                                                                                                                                                                                                                                                                                                                                                                                                                                                                                                                                                                                                                                                                                                                                                                                                                                                                                                                                                                                                                                                                                                                                                                                                                                                                                                                                                                                                                                                                                                                                                                                                                                                                                                                                                                                                                                                    | 2.877163 | 3.395885 | 2.874092 | 1.780956 |   |   |     |          |  |  |  |  |     |          |          |  |  |  |     |          |          |          |  |  |     |          |          |          |          |  |     |          |          |          |          |          |     |          |          |          |          |          |     |          |          |          |          |          |     |          |          |          |          |          |     |          |          |          |          |          |      |          |          |          |          |          |       |          |          |          |          |          |       |          |          |          |          |          |  |   |   |   |   |    |     |          |  |  |  |  |     |          |          |  |  |  |     |          |          |          |  |  |     |          |          |          |          |  |      |          |          |          |          |          |       |          |          |          |          |          |       |          |          |          |          |          |  |    |    |  |  |  |       |          |  |  |  |  |       |          |          |  |  |  |
| 11 B                                                                                                                                   | 2.865000                                                                                                                                                                                                                                                                                                                                                                                                                                                                                                                                                                                                                                                                                                                                                                                                                                                                                                                                                                                                                                                                                                                                                                                                                                                                                                                                                                                                                                                                                                                                                                                                                                                                                                                                                                                                                                                                                                                                                                                                                                                                                                                                                                                                                                                                                                                                                                                                                    | 2.859990 | 2.883659 | 3.354261 | 1.742153 |   |   |     |          |  |  |  |  |     |          |          |  |  |  |     |          |          |          |  |  |     |          |          |          |          |  |     |          |          |          |          |          |     |          |          |          |          |          |     |          |          |          |          |          |     |          |          |          |          |          |     |          |          |          |          |          |      |          |          |          |          |          |       |          |          |          |          |          |       |          |          |          |          |          |  |   |   |   |   |    |     |          |  |  |  |  |     |          |          |  |  |  |     |          |          |          |  |  |     |          |          |          |          |  |      |          |          |          |          |          |       |          |          |          |          |          |       |          |          |          |          |          |  |    |    |  |  |  |       |          |  |  |  |  |       |          |          |  |  |  |
| 12 Co                                                                                                                                  | 2.059489                                                                                                                                                                                                                                                                                                                                                                                                                                                                                                                                                                                                                                                                                                                                                                                                                                                                                                                                                                                                                                                                                                                                                                                                                                                                                                                                                                                                                                                                                                                                                                                                                                                                                                                                                                                                                                                                                                                                                                                                                                                                                                                                                                                                                                                                                                                                                                                                                    | 3.848910 | 3.304458 | 3.275017 | 3.275015 |   |   |     |          |  |  |  |  |     |          |          |  |  |  |     |          |          |          |  |  |     |          |          |          |          |  |     |          |          |          |          |          |     |          |          |          |          |          |     |          |          |          |          |          |     |          |          |          |          |          |     |          |          |          |          |          |      |          |          |          |          |          |       |          |          |          |          |          |       |          |          |          |          |          |  |   |   |   |   |    |     |          |  |  |  |  |     |          |          |  |  |  |     |          |          |          |  |  |     |          |          |          |          |  |      |          |          |          |          |          |       |          |          |          |          |          |       |          |          |          |          |          |  |    |    |  |  |  |       |          |  |  |  |  |       |          |          |  |  |  |
|                                                                                                                                        | 6                                                                                                                                                                                                                                                                                                                                                                                                                                                                                                                                                                                                                                                                                                                                                                                                                                                                                                                                                                                                                                                                                                                                                                                                                                                                                                                                                                                                                                                                                                                                                                                                                                                                                                                                                                                                                                                                                                                                                                                                                                                                                                                                                                                                                                                                                                                                                                                                                           | 7        | 8        | 9        | 10       |   |   |     |          |  |  |  |  |     |          |          |  |  |  |     |          |          |          |  |  |     |          |          |          |          |  |     |          |          |          |          |          |     |          |          |          |          |          |     |          |          |          |          |          |     |          |          |          |          |          |     |          |          |          |          |          |      |          |          |          |          |          |       |          |          |          |          |          |       |          |          |          |          |          |  |   |   |   |   |    |     |          |  |  |  |  |     |          |          |  |  |  |     |          |          |          |  |  |     |          |          |          |          |  |      |          |          |          |          |          |       |          |          |          |          |          |       |          |          |          |          |          |  |    |    |  |  |  |       |          |  |  |  |  |       |          |          |  |  |  |
| 6 B                                                                                                                                    | 0.000000                                                                                                                                                                                                                                                                                                                                                                                                                                                                                                                                                                                                                                                                                                                                                                                                                                                                                                                                                                                                                                                                                                                                                                                                                                                                                                                                                                                                                                                                                                                                                                                                                                                                                                                                                                                                                                                                                                                                                                                                                                                                                                                                                                                                                                                                                                                                                                                                                    |          |          |          |          |   |   |     |          |  |  |  |  |     |          |          |  |  |  |     |          |          |          |  |  |     |          |          |          |          |  |     |          |          |          |          |          |     |          |          |          |          |          |     |          |          |          |          |          |     |          |          |          |          |          |     |          |          |          |          |          |      |          |          |          |          |          |       |          |          |          |          |          |       |          |          |          |          |          |  |   |   |   |   |    |     |          |  |  |  |  |     |          |          |  |  |  |     |          |          |          |  |  |     |          |          |          |          |  |      |          |          |          |          |          |       |          |          |          |          |          |       |          |          |          |          |          |  |    |    |  |  |  |       |          |  |  |  |  |       |          |          |  |  |  |
| 7 B                                                                                                                                    | 2.842470                                                                                                                                                                                                                                                                                                                                                                                                                                                                                                                                                                                                                                                                                                                                                                                                                                                                                                                                                                                                                                                                                                                                                                                                                                                                                                                                                                                                                                                                                                                                                                                                                                                                                                                                                                                                                                                                                                                                                                                                                                                                                                                                                                                                                                                                                                                                                                                                                    | 0.000000 |          |          |          |   |   |     |          |  |  |  |  |     |          |          |  |  |  |     |          |          |          |  |  |     |          |          |          |          |  |     |          |          |          |          |          |     |          |          |          |          |          |     |          |          |          |          |          |     |          |          |          |          |          |     |          |          |          |          |          |      |          |          |          |          |          |       |          |          |          |          |          |       |          |          |          |          |          |  |   |   |   |   |    |     |          |  |  |  |  |     |          |          |  |  |  |     |          |          |          |  |  |     |          |          |          |          |  |      |          |          |          |          |          |       |          |          |          |          |          |       |          |          |          |          |          |  |    |    |  |  |  |       |          |  |  |  |  |       |          |          |  |  |  |
| 8 N                                                                                                                                    | 1.679951                                                                                                                                                                                                                                                                                                                                                                                                                                                                                                                                                                                                                                                                                                                                                                                                                                                                                                                                                                                                                                                                                                                                                                                                                                                                                                                                                                                                                                                                                                                                                                                                                                                                                                                                                                                                                                                                                                                                                                                                                                                                                                                                                                                                                                                                                                                                                                                                                    | 3.157153 | 0.000000 |          |          |   |   |     |          |  |  |  |  |     |          |          |  |  |  |     |          |          |          |  |  |     |          |          |          |          |  |     |          |          |          |          |          |     |          |          |          |          |          |     |          |          |          |          |          |     |          |          |          |          |          |     |          |          |          |          |          |      |          |          |          |          |          |       |          |          |          |          |          |       |          |          |          |          |          |  |   |   |   |   |    |     |          |  |  |  |  |     |          |          |  |  |  |     |          |          |          |  |  |     |          |          |          |          |  |      |          |          |          |          |          |       |          |          |          |          |          |       |          |          |          |          |          |  |    |    |  |  |  |       |          |  |  |  |  |       |          |          |  |  |  |
| 9 B                                                                                                                                    | 3.395772                                                                                                                                                                                                                                                                                                                                                                                                                                                                                                                                                                                                                                                                                                                                                                                                                                                                                                                                                                                                                                                                                                                                                                                                                                                                                                                                                                                                                                                                                                                                                                                                                                                                                                                                                                                                                                                                                                                                                                                                                                                                                                                                                                                                                                                                                                                                                                                                                    | 1.765183 | 2.738788 | 0.000000 |          |   |   |     |          |  |  |  |  |     |          |          |  |  |  |     |          |          |          |  |  |     |          |          |          |          |  |     |          |          |          |          |          |     |          |          |          |          |          |     |          |          |          |          |          |     |          |          |          |          |          |     |          |          |          |          |          |      |          |          |          |          |          |       |          |          |          |          |          |       |          |          |          |          |          |  |   |   |   |   |    |     |          |  |  |  |  |     |          |          |  |  |  |     |          |          |          |  |  |     |          |          |          |          |  |      |          |          |          |          |          |       |          |          |          |          |          |       |          |          |          |          |          |  |    |    |  |  |  |       |          |  |  |  |  |       |          |          |  |  |  |
| 10 B                                                                                                                                   | 2.895934                                                                                                                                                                                                                                                                                                                                                                                                                                                                                                                                                                                                                                                                                                                                                                                                                                                                                                                                                                                                                                                                                                                                                                                                                                                                                                                                                                                                                                                                                                                                                                                                                                                                                                                                                                                                                                                                                                                                                                                                                                                                                                                                                                                                                                                                                                                                                                                                                    | 1.765145 | 2.738861 | 1.774400 | 0.000000 |   |   |     |          |  |  |  |  |     |          |          |  |  |  |     |          |          |          |  |  |     |          |          |          |          |  |     |          |          |          |          |          |     |          |          |          |          |          |     |          |          |          |          |          |     |          |          |          |          |          |     |          |          |          |          |          |      |          |          |          |          |          |       |          |          |          |          |          |       |          |          |          |          |          |  |   |   |   |   |    |     |          |  |  |  |  |     |          |          |  |  |  |     |          |          |          |  |  |     |          |          |          |          |  |      |          |          |          |          |          |       |          |          |          |          |          |       |          |          |          |          |          |  |    |    |  |  |  |       |          |  |  |  |  |       |          |          |  |  |  |
| 11 B                                                                                                                                   | 1.799046                                                                                                                                                                                                                                                                                                                                                                                                                                                                                                                                                                                                                                                                                                                                                                                                                                                                                                                                                                                                                                                                                                                                                                                                                                                                                                                                                                                                                                                                                                                                                                                                                                                                                                                                                                                                                                                                                                                                                                                                                                                                                                                                                                                                                                                                                                                                                                                                                    | 2.841220 | 1.693718 | 2.871309 | 1.777909 |   |   |     |          |  |  |  |  |     |          |          |  |  |  |     |          |          |          |  |  |     |          |          |          |          |  |     |          |          |          |          |          |     |          |          |          |          |          |     |          |          |          |          |          |     |          |          |          |          |          |     |          |          |          |          |          |      |          |          |          |          |          |       |          |          |          |          |          |       |          |          |          |          |          |  |   |   |   |   |    |     |          |  |  |  |  |     |          |          |  |  |  |     |          |          |          |  |  |     |          |          |          |          |  |      |          |          |          |          |          |       |          |          |          |          |          |       |          |          |          |          |          |  |    |    |  |  |  |       |          |  |  |  |  |       |          |          |  |  |  |
| 12 Co                                                                                                                                  | 3.304358                                                                                                                                                                                                                                                                                                                                                                                                                                                                                                                                                                                                                                                                                                                                                                                                                                                                                                                                                                                                                                                                                                                                                                                                                                                                                                                                                                                                                                                                                                                                                                                                                                                                                                                                                                                                                                                                                                                                                                                                                                                                                                                                                                                                                                                                                                                                                                                                                    | 3.282449 | 2.027482 | 2.088118 | 2.088159 |   |   |     |          |  |  |  |  |     |          |          |  |  |  |     |          |          |          |  |  |     |          |          |          |          |  |     |          |          |          |          |          |     |          |          |          |          |          |     |          |          |          |          |          |     |          |          |          |          |          |     |          |          |          |          |          |      |          |          |          |          |          |       |          |          |          |          |          |       |          |          |          |          |          |  |   |   |   |   |    |     |          |  |  |  |  |     |          |          |  |  |  |     |          |          |          |  |  |     |          |          |          |          |  |      |          |          |          |          |          |       |          |          |          |          |          |       |          |          |          |          |          |  |    |    |  |  |  |       |          |  |  |  |  |       |          |          |  |  |  |
|                                                                                                                                        | 11                                                                                                                                                                                                                                                                                                                                                                                                                                                                                                                                                                                                                                                                                                                                                                                                                                                                                                                                                                                                                                                                                                                                                                                                                                                                                                                                                                                                                                                                                                                                                                                                                                                                                                                                                                                                                                                                                                                                                                                                                                                                                                                                                                                                                                                                                                                                                                                                                          | 12       |          |          |          |   |   |     |          |  |  |  |  |     |          |          |  |  |  |     |          |          |          |  |  |     |          |          |          |          |  |     |          |          |          |          |          |     |          |          |          |          |          |     |          |          |          |          |          |     |          |          |          |          |          |     |          |          |          |          |          |      |          |          |          |          |          |       |          |          |          |          |          |       |          |          |          |          |          |  |   |   |   |   |    |     |          |  |  |  |  |     |          |          |  |  |  |     |          |          |          |  |  |     |          |          |          |          |  |      |          |          |          |          |          |       |          |          |          |          |          |       |          |          |          |          |          |  |    |    |  |  |  |       |          |  |  |  |  |       |          |          |  |  |  |
| 11 B                                                                                                                                   | 0.000000                                                                                                                                                                                                                                                                                                                                                                                                                                                                                                                                                                                                                                                                                                                                                                                                                                                                                                                                                                                                                                                                                                                                                                                                                                                                                                                                                                                                                                                                                                                                                                                                                                                                                                                                                                                                                                                                                                                                                                                                                                                                                                                                                                                                                                                                                                                                                                                                                    |          |          |          |          |   |   |     |          |  |  |  |  |     |          |          |  |  |  |     |          |          |          |  |  |     |          |          |          |          |  |     |          |          |          |          |          |     |          |          |          |          |          |     |          |          |          |          |          |     |          |          |          |          |          |     |          |          |          |          |          |      |          |          |          |          |          |       |          |          |          |          |          |       |          |          |          |          |          |  |   |   |   |   |    |     |          |  |  |  |  |     |          |          |  |  |  |     |          |          |          |  |  |     |          |          |          |          |  |      |          |          |          |          |          |       |          |          |          |          |          |       |          |          |          |          |          |  |    |    |  |  |  |       |          |  |  |  |  |       |          |          |  |  |  |
| 12 Co                                                                                                                                  | 2.059418                                                                                                                                                                                                                                                                                                                                                                                                                                                                                                                                                                                                                                                                                                                                                                                                                                                                                                                                                                                                                                                                                                                                                                                                                                                                                                                                                                                                                                                                                                                                                                                                                                                                                                                                                                                                                                                                                                                                                                                                                                                                                                                                                                                                                                                                                                                                                                                                                    | 0.000000 |          |          |          |   |   |     |          |  |  |  |  |     |          |          |  |  |  |     |          |          |          |  |  |     |          |          |          |          |  |     |          |          |          |          |          |     |          |          |          |          |          |     |          |          |          |          |          |     |          |          |          |          |          |     |          |          |          |          |          |      |          |          |          |          |          |       |          |          |          |          |          |       |          |          |          |          |          |  |   |   |   |   |    |     |          |  |  |  |  |     |          |          |  |  |  |     |          |          |          |  |  |     |          |          |          |          |  |      |          |          |          |          |          |       |          |          |          |          |          |       |          |          |          |          |          |  |    |    |  |  |  |       |          |  |  |  |  |       |          |          |  |  |  |
|  <p>2. -1886.205739 +0.7 H/L 3.22 C<sub>s</sub></p> | <table border="1"> <thead> <tr> <th></th> <th>1</th> <th>2</th> <th>3</th> <th>4</th> <th>5</th> </tr> </thead> <tbody> <tr><td>1 B</td><td>0.000000</td><td></td><td></td><td></td><td></td></tr> <tr><td>2 N</td><td>1.683010</td><td>0.000000</td><td></td><td></td><td></td></tr> <tr><td>3 B</td><td>2.892100</td><td>1.683065</td><td>0.000000</td><td></td><td></td></tr> <tr><td>4 B</td><td>3.387557</td><td>2.683217</td><td>1.747790</td><td>0.000000</td><td></td></tr> <tr><td>5 B</td><td>2.847344</td><td>3.134390</td><td>2.847365</td><td>1.789419</td><td>0.000000</td></tr> <tr><td>6 B</td><td>1.747736</td><td>2.683090</td><td>3.387490</td><td>2.911600</td><td>1.789407</td></tr> <tr><td>7 B</td><td>1.795134</td><td>1.699388</td><td>1.795162</td><td>2.868268</td><td>2.835071</td></tr> <tr><td>8 B</td><td>1.751300</td><td>2.670150</td><td>2.863737</td><td>2.885970</td><td>1.769960</td></tr> <tr><td>9 B</td><td>1.784552</td><td>1.707604</td><td>2.919836</td><td>2.909516</td><td>2.867844</td></tr> <tr><td>10 B</td><td>2.863715</td><td>2.670194</td><td>1.751362</td><td>1.777730</td><td>1.769944</td></tr> <tr><td>11 Co</td><td>3.233019</td><td>3.042614</td><td>3.233025</td><td>2.064937</td><td>2.075118</td></tr> <tr><td>12 B</td><td>2.919829</td><td>1.707647</td><td>1.784526</td><td>1.757321</td><td>2.867808</td></tr> <tr> <td></td> <td>6</td> <td>7</td> <td>8</td> <td>9</td> <td>10</td> </tr> <tr><td>6 B</td><td>0.000000</td><td></td><td></td><td></td><td></td></tr> <tr><td>7 B</td><td>2.868211</td><td>0.000000</td><td></td><td></td><td></td></tr> <tr><td>8 B</td><td>1.777720</td><td>1.735763</td><td>0.000000</td><td></td><td></td></tr> <tr><td>9 B</td><td>1.757265</td><td>2.919761</td><td>2.873116</td><td>0.000000</td><td></td></tr> <tr><td>10 B</td><td>2.885923</td><td>1.735781</td><td>1.775100</td><td>3.396023</td><td>0.000000</td></tr> <tr><td>11 Co</td><td>2.064869</td><td>3.808696</td><td>3.267467</td><td>1.998843</td><td>3.267472</td></tr> <tr><td>12 B</td><td>2.909395</td><td>2.919751</td><td>3.395988</td><td>1.846700</td><td>2.873109</td></tr> <tr> <td></td> <td>11</td> <td>12</td> <td></td> <td></td> <td></td> </tr> <tr><td>11 Co</td><td>0.000000</td><td></td><td></td><td></td><td></td></tr> <tr><td>12 B</td><td>1.998821</td><td>0.000000</td><td></td><td></td><td></td></tr> </tbody> </table> |          | 1        | 2        | 3        | 4 | 5 | 1 B | 0.000000 |  |  |  |  | 2 N | 1.683010 | 0.000000 |  |  |  | 3 B | 2.892100 | 1.683065 | 0.000000 |  |  | 4 B | 3.387557 | 2.683217 | 1.747790 | 0.000000 |  | 5 B | 2.847344 | 3.134390 | 2.847365 | 1.789419 | 0.000000 | 6 B | 1.747736 | 2.683090 | 3.387490 | 2.911600 | 1.789407 | 7 B | 1.795134 | 1.699388 | 1.795162 | 2.868268 | 2.835071 | 8 B | 1.751300 | 2.670150 | 2.863737 | 2.885970 | 1.769960 | 9 B | 1.784552 | 1.707604 | 2.919836 | 2.909516 | 2.867844 | 10 B | 2.863715 | 2.670194 | 1.751362 | 1.777730 | 1.769944 | 11 Co | 3.233019 | 3.042614 | 3.233025 | 2.064937 | 2.075118 | 12 B  | 2.919829 | 1.707647 | 1.784526 | 1.757321 | 2.867808 |  | 6 | 7 | 8 | 9 | 10 | 6 B | 0.000000 |  |  |  |  | 7 B | 2.868211 | 0.000000 |  |  |  | 8 B | 1.777720 | 1.735763 | 0.000000 |  |  | 9 B | 1.757265 | 2.919761 | 2.873116 | 0.000000 |  | 10 B | 2.885923 | 1.735781 | 1.775100 | 3.396023 | 0.000000 | 11 Co | 2.064869 | 3.808696 | 3.267467 | 1.998843 | 3.267472 | 12 B  | 2.909395 | 2.919751 | 3.395988 | 1.846700 | 2.873109 |  | 11 | 12 |  |  |  | 11 Co | 0.000000 |  |  |  |  | 12 B  | 1.998821 | 0.000000 |  |  |  |
|                                                                                                                                        | 1                                                                                                                                                                                                                                                                                                                                                                                                                                                                                                                                                                                                                                                                                                                                                                                                                                                                                                                                                                                                                                                                                                                                                                                                                                                                                                                                                                                                                                                                                                                                                                                                                                                                                                                                                                                                                                                                                                                                                                                                                                                                                                                                                                                                                                                                                                                                                                                                                           | 2        | 3        | 4        | 5        |   |   |     |          |  |  |  |  |     |          |          |  |  |  |     |          |          |          |  |  |     |          |          |          |          |  |     |          |          |          |          |          |     |          |          |          |          |          |     |          |          |          |          |          |     |          |          |          |          |          |     |          |          |          |          |          |      |          |          |          |          |          |       |          |          |          |          |          |       |          |          |          |          |          |  |   |   |   |   |    |     |          |  |  |  |  |     |          |          |  |  |  |     |          |          |          |  |  |     |          |          |          |          |  |      |          |          |          |          |          |       |          |          |          |          |          |       |          |          |          |          |          |  |    |    |  |  |  |       |          |  |  |  |  |       |          |          |  |  |  |
| 1 B                                                                                                                                    | 0.000000                                                                                                                                                                                                                                                                                                                                                                                                                                                                                                                                                                                                                                                                                                                                                                                                                                                                                                                                                                                                                                                                                                                                                                                                                                                                                                                                                                                                                                                                                                                                                                                                                                                                                                                                                                                                                                                                                                                                                                                                                                                                                                                                                                                                                                                                                                                                                                                                                    |          |          |          |          |   |   |     |          |  |  |  |  |     |          |          |  |  |  |     |          |          |          |  |  |     |          |          |          |          |  |     |          |          |          |          |          |     |          |          |          |          |          |     |          |          |          |          |          |     |          |          |          |          |          |     |          |          |          |          |          |      |          |          |          |          |          |       |          |          |          |          |          |       |          |          |          |          |          |  |   |   |   |   |    |     |          |  |  |  |  |     |          |          |  |  |  |     |          |          |          |  |  |     |          |          |          |          |  |      |          |          |          |          |          |       |          |          |          |          |          |       |          |          |          |          |          |  |    |    |  |  |  |       |          |  |  |  |  |       |          |          |  |  |  |
| 2 N                                                                                                                                    | 1.683010                                                                                                                                                                                                                                                                                                                                                                                                                                                                                                                                                                                                                                                                                                                                                                                                                                                                                                                                                                                                                                                                                                                                                                                                                                                                                                                                                                                                                                                                                                                                                                                                                                                                                                                                                                                                                                                                                                                                                                                                                                                                                                                                                                                                                                                                                                                                                                                                                    | 0.000000 |          |          |          |   |   |     |          |  |  |  |  |     |          |          |  |  |  |     |          |          |          |  |  |     |          |          |          |          |  |     |          |          |          |          |          |     |          |          |          |          |          |     |          |          |          |          |          |     |          |          |          |          |          |     |          |          |          |          |          |      |          |          |          |          |          |       |          |          |          |          |          |       |          |          |          |          |          |  |   |   |   |   |    |     |          |  |  |  |  |     |          |          |  |  |  |     |          |          |          |  |  |     |          |          |          |          |  |      |          |          |          |          |          |       |          |          |          |          |          |       |          |          |          |          |          |  |    |    |  |  |  |       |          |  |  |  |  |       |          |          |  |  |  |
| 3 B                                                                                                                                    | 2.892100                                                                                                                                                                                                                                                                                                                                                                                                                                                                                                                                                                                                                                                                                                                                                                                                                                                                                                                                                                                                                                                                                                                                                                                                                                                                                                                                                                                                                                                                                                                                                                                                                                                                                                                                                                                                                                                                                                                                                                                                                                                                                                                                                                                                                                                                                                                                                                                                                    | 1.683065 | 0.000000 |          |          |   |   |     |          |  |  |  |  |     |          |          |  |  |  |     |          |          |          |  |  |     |          |          |          |          |  |     |          |          |          |          |          |     |          |          |          |          |          |     |          |          |          |          |          |     |          |          |          |          |          |     |          |          |          |          |          |      |          |          |          |          |          |       |          |          |          |          |          |       |          |          |          |          |          |  |   |   |   |   |    |     |          |  |  |  |  |     |          |          |  |  |  |     |          |          |          |  |  |     |          |          |          |          |  |      |          |          |          |          |          |       |          |          |          |          |          |       |          |          |          |          |          |  |    |    |  |  |  |       |          |  |  |  |  |       |          |          |  |  |  |
| 4 B                                                                                                                                    | 3.387557                                                                                                                                                                                                                                                                                                                                                                                                                                                                                                                                                                                                                                                                                                                                                                                                                                                                                                                                                                                                                                                                                                                                                                                                                                                                                                                                                                                                                                                                                                                                                                                                                                                                                                                                                                                                                                                                                                                                                                                                                                                                                                                                                                                                                                                                                                                                                                                                                    | 2.683217 | 1.747790 | 0.000000 |          |   |   |     |          |  |  |  |  |     |          |          |  |  |  |     |          |          |          |  |  |     |          |          |          |          |  |     |          |          |          |          |          |     |          |          |          |          |          |     |          |          |          |          |          |     |          |          |          |          |          |     |          |          |          |          |          |      |          |          |          |          |          |       |          |          |          |          |          |       |          |          |          |          |          |  |   |   |   |   |    |     |          |  |  |  |  |     |          |          |  |  |  |     |          |          |          |  |  |     |          |          |          |          |  |      |          |          |          |          |          |       |          |          |          |          |          |       |          |          |          |          |          |  |    |    |  |  |  |       |          |  |  |  |  |       |          |          |  |  |  |
| 5 B                                                                                                                                    | 2.847344                                                                                                                                                                                                                                                                                                                                                                                                                                                                                                                                                                                                                                                                                                                                                                                                                                                                                                                                                                                                                                                                                                                                                                                                                                                                                                                                                                                                                                                                                                                                                                                                                                                                                                                                                                                                                                                                                                                                                                                                                                                                                                                                                                                                                                                                                                                                                                                                                    | 3.134390 | 2.847365 | 1.789419 | 0.000000 |   |   |     |          |  |  |  |  |     |          |          |  |  |  |     |          |          |          |  |  |     |          |          |          |          |  |     |          |          |          |          |          |     |          |          |          |          |          |     |          |          |          |          |          |     |          |          |          |          |          |     |          |          |          |          |          |      |          |          |          |          |          |       |          |          |          |          |          |       |          |          |          |          |          |  |   |   |   |   |    |     |          |  |  |  |  |     |          |          |  |  |  |     |          |          |          |  |  |     |          |          |          |          |  |      |          |          |          |          |          |       |          |          |          |          |          |       |          |          |          |          |          |  |    |    |  |  |  |       |          |  |  |  |  |       |          |          |  |  |  |
| 6 B                                                                                                                                    | 1.747736                                                                                                                                                                                                                                                                                                                                                                                                                                                                                                                                                                                                                                                                                                                                                                                                                                                                                                                                                                                                                                                                                                                                                                                                                                                                                                                                                                                                                                                                                                                                                                                                                                                                                                                                                                                                                                                                                                                                                                                                                                                                                                                                                                                                                                                                                                                                                                                                                    | 2.683090 | 3.387490 | 2.911600 | 1.789407 |   |   |     |          |  |  |  |  |     |          |          |  |  |  |     |          |          |          |  |  |     |          |          |          |          |  |     |          |          |          |          |          |     |          |          |          |          |          |     |          |          |          |          |          |     |          |          |          |          |          |     |          |          |          |          |          |      |          |          |          |          |          |       |          |          |          |          |          |       |          |          |          |          |          |  |   |   |   |   |    |     |          |  |  |  |  |     |          |          |  |  |  |     |          |          |          |  |  |     |          |          |          |          |  |      |          |          |          |          |          |       |          |          |          |          |          |       |          |          |          |          |          |  |    |    |  |  |  |       |          |  |  |  |  |       |          |          |  |  |  |
| 7 B                                                                                                                                    | 1.795134                                                                                                                                                                                                                                                                                                                                                                                                                                                                                                                                                                                                                                                                                                                                                                                                                                                                                                                                                                                                                                                                                                                                                                                                                                                                                                                                                                                                                                                                                                                                                                                                                                                                                                                                                                                                                                                                                                                                                                                                                                                                                                                                                                                                                                                                                                                                                                                                                    | 1.699388 | 1.795162 | 2.868268 | 2.835071 |   |   |     |          |  |  |  |  |     |          |          |  |  |  |     |          |          |          |  |  |     |          |          |          |          |  |     |          |          |          |          |          |     |          |          |          |          |          |     |          |          |          |          |          |     |          |          |          |          |          |     |          |          |          |          |          |      |          |          |          |          |          |       |          |          |          |          |          |       |          |          |          |          |          |  |   |   |   |   |    |     |          |  |  |  |  |     |          |          |  |  |  |     |          |          |          |  |  |     |          |          |          |          |  |      |          |          |          |          |          |       |          |          |          |          |          |       |          |          |          |          |          |  |    |    |  |  |  |       |          |  |  |  |  |       |          |          |  |  |  |
| 8 B                                                                                                                                    | 1.751300                                                                                                                                                                                                                                                                                                                                                                                                                                                                                                                                                                                                                                                                                                                                                                                                                                                                                                                                                                                                                                                                                                                                                                                                                                                                                                                                                                                                                                                                                                                                                                                                                                                                                                                                                                                                                                                                                                                                                                                                                                                                                                                                                                                                                                                                                                                                                                                                                    | 2.670150 | 2.863737 | 2.885970 | 1.769960 |   |   |     |          |  |  |  |  |     |          |          |  |  |  |     |          |          |          |  |  |     |          |          |          |          |  |     |          |          |          |          |          |     |          |          |          |          |          |     |          |          |          |          |          |     |          |          |          |          |          |     |          |          |          |          |          |      |          |          |          |          |          |       |          |          |          |          |          |       |          |          |          |          |          |  |   |   |   |   |    |     |          |  |  |  |  |     |          |          |  |  |  |     |          |          |          |  |  |     |          |          |          |          |  |      |          |          |          |          |          |       |          |          |          |          |          |       |          |          |          |          |          |  |    |    |  |  |  |       |          |  |  |  |  |       |          |          |  |  |  |
| 9 B                                                                                                                                    | 1.784552                                                                                                                                                                                                                                                                                                                                                                                                                                                                                                                                                                                                                                                                                                                                                                                                                                                                                                                                                                                                                                                                                                                                                                                                                                                                                                                                                                                                                                                                                                                                                                                                                                                                                                                                                                                                                                                                                                                                                                                                                                                                                                                                                                                                                                                                                                                                                                                                                    | 1.707604 | 2.919836 | 2.909516 | 2.867844 |   |   |     |          |  |  |  |  |     |          |          |  |  |  |     |          |          |          |  |  |     |          |          |          |          |  |     |          |          |          |          |          |     |          |          |          |          |          |     |          |          |          |          |          |     |          |          |          |          |          |     |          |          |          |          |          |      |          |          |          |          |          |       |          |          |          |          |          |       |          |          |          |          |          |  |   |   |   |   |    |     |          |  |  |  |  |     |          |          |  |  |  |     |          |          |          |  |  |     |          |          |          |          |  |      |          |          |          |          |          |       |          |          |          |          |          |       |          |          |          |          |          |  |    |    |  |  |  |       |          |  |  |  |  |       |          |          |  |  |  |
| 10 B                                                                                                                                   | 2.863715                                                                                                                                                                                                                                                                                                                                                                                                                                                                                                                                                                                                                                                                                                                                                                                                                                                                                                                                                                                                                                                                                                                                                                                                                                                                                                                                                                                                                                                                                                                                                                                                                                                                                                                                                                                                                                                                                                                                                                                                                                                                                                                                                                                                                                                                                                                                                                                                                    | 2.670194 | 1.751362 | 1.777730 | 1.769944 |   |   |     |          |  |  |  |  |     |          |          |  |  |  |     |          |          |          |  |  |     |          |          |          |          |  |     |          |          |          |          |          |     |          |          |          |          |          |     |          |          |          |          |          |     |          |          |          |          |          |     |          |          |          |          |          |      |          |          |          |          |          |       |          |          |          |          |          |       |          |          |          |          |          |  |   |   |   |   |    |     |          |  |  |  |  |     |          |          |  |  |  |     |          |          |          |  |  |     |          |          |          |          |  |      |          |          |          |          |          |       |          |          |          |          |          |       |          |          |          |          |          |  |    |    |  |  |  |       |          |  |  |  |  |       |          |          |  |  |  |
| 11 Co                                                                                                                                  | 3.233019                                                                                                                                                                                                                                                                                                                                                                                                                                                                                                                                                                                                                                                                                                                                                                                                                                                                                                                                                                                                                                                                                                                                                                                                                                                                                                                                                                                                                                                                                                                                                                                                                                                                                                                                                                                                                                                                                                                                                                                                                                                                                                                                                                                                                                                                                                                                                                                                                    | 3.042614 | 3.233025 | 2.064937 | 2.075118 |   |   |     |          |  |  |  |  |     |          |          |  |  |  |     |          |          |          |  |  |     |          |          |          |          |  |     |          |          |          |          |          |     |          |          |          |          |          |     |          |          |          |          |          |     |          |          |          |          |          |     |          |          |          |          |          |      |          |          |          |          |          |       |          |          |          |          |          |       |          |          |          |          |          |  |   |   |   |   |    |     |          |  |  |  |  |     |          |          |  |  |  |     |          |          |          |  |  |     |          |          |          |          |  |      |          |          |          |          |          |       |          |          |          |          |          |       |          |          |          |          |          |  |    |    |  |  |  |       |          |  |  |  |  |       |          |          |  |  |  |
| 12 B                                                                                                                                   | 2.919829                                                                                                                                                                                                                                                                                                                                                                                                                                                                                                                                                                                                                                                                                                                                                                                                                                                                                                                                                                                                                                                                                                                                                                                                                                                                                                                                                                                                                                                                                                                                                                                                                                                                                                                                                                                                                                                                                                                                                                                                                                                                                                                                                                                                                                                                                                                                                                                                                    | 1.707647 | 1.784526 | 1.757321 | 2.867808 |   |   |     |          |  |  |  |  |     |          |          |  |  |  |     |          |          |          |  |  |     |          |          |          |          |  |     |          |          |          |          |          |     |          |          |          |          |          |     |          |          |          |          |          |     |          |          |          |          |          |     |          |          |          |          |          |      |          |          |          |          |          |       |          |          |          |          |          |       |          |          |          |          |          |  |   |   |   |   |    |     |          |  |  |  |  |     |          |          |  |  |  |     |          |          |          |  |  |     |          |          |          |          |  |      |          |          |          |          |          |       |          |          |          |          |          |       |          |          |          |          |          |  |    |    |  |  |  |       |          |  |  |  |  |       |          |          |  |  |  |
|                                                                                                                                        | 6                                                                                                                                                                                                                                                                                                                                                                                                                                                                                                                                                                                                                                                                                                                                                                                                                                                                                                                                                                                                                                                                                                                                                                                                                                                                                                                                                                                                                                                                                                                                                                                                                                                                                                                                                                                                                                                                                                                                                                                                                                                                                                                                                                                                                                                                                                                                                                                                                           | 7        | 8        | 9        | 10       |   |   |     |          |  |  |  |  |     |          |          |  |  |  |     |          |          |          |  |  |     |          |          |          |          |  |     |          |          |          |          |          |     |          |          |          |          |          |     |          |          |          |          |          |     |          |          |          |          |          |     |          |          |          |          |          |      |          |          |          |          |          |       |          |          |          |          |          |       |          |          |          |          |          |  |   |   |   |   |    |     |          |  |  |  |  |     |          |          |  |  |  |     |          |          |          |  |  |     |          |          |          |          |  |      |          |          |          |          |          |       |          |          |          |          |          |       |          |          |          |          |          |  |    |    |  |  |  |       |          |  |  |  |  |       |          |          |  |  |  |
| 6 B                                                                                                                                    | 0.000000                                                                                                                                                                                                                                                                                                                                                                                                                                                                                                                                                                                                                                                                                                                                                                                                                                                                                                                                                                                                                                                                                                                                                                                                                                                                                                                                                                                                                                                                                                                                                                                                                                                                                                                                                                                                                                                                                                                                                                                                                                                                                                                                                                                                                                                                                                                                                                                                                    |          |          |          |          |   |   |     |          |  |  |  |  |     |          |          |  |  |  |     |          |          |          |  |  |     |          |          |          |          |  |     |          |          |          |          |          |     |          |          |          |          |          |     |          |          |          |          |          |     |          |          |          |          |          |     |          |          |          |          |          |      |          |          |          |          |          |       |          |          |          |          |          |       |          |          |          |          |          |  |   |   |   |   |    |     |          |  |  |  |  |     |          |          |  |  |  |     |          |          |          |  |  |     |          |          |          |          |  |      |          |          |          |          |          |       |          |          |          |          |          |       |          |          |          |          |          |  |    |    |  |  |  |       |          |  |  |  |  |       |          |          |  |  |  |
| 7 B                                                                                                                                    | 2.868211                                                                                                                                                                                                                                                                                                                                                                                                                                                                                                                                                                                                                                                                                                                                                                                                                                                                                                                                                                                                                                                                                                                                                                                                                                                                                                                                                                                                                                                                                                                                                                                                                                                                                                                                                                                                                                                                                                                                                                                                                                                                                                                                                                                                                                                                                                                                                                                                                    | 0.000000 |          |          |          |   |   |     |          |  |  |  |  |     |          |          |  |  |  |     |          |          |          |  |  |     |          |          |          |          |  |     |          |          |          |          |          |     |          |          |          |          |          |     |          |          |          |          |          |     |          |          |          |          |          |     |          |          |          |          |          |      |          |          |          |          |          |       |          |          |          |          |          |       |          |          |          |          |          |  |   |   |   |   |    |     |          |  |  |  |  |     |          |          |  |  |  |     |          |          |          |  |  |     |          |          |          |          |  |      |          |          |          |          |          |       |          |          |          |          |          |       |          |          |          |          |          |  |    |    |  |  |  |       |          |  |  |  |  |       |          |          |  |  |  |
| 8 B                                                                                                                                    | 1.777720                                                                                                                                                                                                                                                                                                                                                                                                                                                                                                                                                                                                                                                                                                                                                                                                                                                                                                                                                                                                                                                                                                                                                                                                                                                                                                                                                                                                                                                                                                                                                                                                                                                                                                                                                                                                                                                                                                                                                                                                                                                                                                                                                                                                                                                                                                                                                                                                                    | 1.735763 | 0.000000 |          |          |   |   |     |          |  |  |  |  |     |          |          |  |  |  |     |          |          |          |  |  |     |          |          |          |          |  |     |          |          |          |          |          |     |          |          |          |          |          |     |          |          |          |          |          |     |          |          |          |          |          |     |          |          |          |          |          |      |          |          |          |          |          |       |          |          |          |          |          |       |          |          |          |          |          |  |   |   |   |   |    |     |          |  |  |  |  |     |          |          |  |  |  |     |          |          |          |  |  |     |          |          |          |          |  |      |          |          |          |          |          |       |          |          |          |          |          |       |          |          |          |          |          |  |    |    |  |  |  |       |          |  |  |  |  |       |          |          |  |  |  |
| 9 B                                                                                                                                    | 1.757265                                                                                                                                                                                                                                                                                                                                                                                                                                                                                                                                                                                                                                                                                                                                                                                                                                                                                                                                                                                                                                                                                                                                                                                                                                                                                                                                                                                                                                                                                                                                                                                                                                                                                                                                                                                                                                                                                                                                                                                                                                                                                                                                                                                                                                                                                                                                                                                                                    | 2.919761 | 2.873116 | 0.000000 |          |   |   |     |          |  |  |  |  |     |          |          |  |  |  |     |          |          |          |  |  |     |          |          |          |          |  |     |          |          |          |          |          |     |          |          |          |          |          |     |          |          |          |          |          |     |          |          |          |          |          |     |          |          |          |          |          |      |          |          |          |          |          |       |          |          |          |          |          |       |          |          |          |          |          |  |   |   |   |   |    |     |          |  |  |  |  |     |          |          |  |  |  |     |          |          |          |  |  |     |          |          |          |          |  |      |          |          |          |          |          |       |          |          |          |          |          |       |          |          |          |          |          |  |    |    |  |  |  |       |          |  |  |  |  |       |          |          |  |  |  |
| 10 B                                                                                                                                   | 2.885923                                                                                                                                                                                                                                                                                                                                                                                                                                                                                                                                                                                                                                                                                                                                                                                                                                                                                                                                                                                                                                                                                                                                                                                                                                                                                                                                                                                                                                                                                                                                                                                                                                                                                                                                                                                                                                                                                                                                                                                                                                                                                                                                                                                                                                                                                                                                                                                                                    | 1.735781 | 1.775100 | 3.396023 | 0.000000 |   |   |     |          |  |  |  |  |     |          |          |  |  |  |     |          |          |          |  |  |     |          |          |          |          |  |     |          |          |          |          |          |     |          |          |          |          |          |     |          |          |          |          |          |     |          |          |          |          |          |     |          |          |          |          |          |      |          |          |          |          |          |       |          |          |          |          |          |       |          |          |          |          |          |  |   |   |   |   |    |     |          |  |  |  |  |     |          |          |  |  |  |     |          |          |          |  |  |     |          |          |          |          |  |      |          |          |          |          |          |       |          |          |          |          |          |       |          |          |          |          |          |  |    |    |  |  |  |       |          |  |  |  |  |       |          |          |  |  |  |
| 11 Co                                                                                                                                  | 2.064869                                                                                                                                                                                                                                                                                                                                                                                                                                                                                                                                                                                                                                                                                                                                                                                                                                                                                                                                                                                                                                                                                                                                                                                                                                                                                                                                                                                                                                                                                                                                                                                                                                                                                                                                                                                                                                                                                                                                                                                                                                                                                                                                                                                                                                                                                                                                                                                                                    | 3.808696 | 3.267467 | 1.998843 | 3.267472 |   |   |     |          |  |  |  |  |     |          |          |  |  |  |     |          |          |          |  |  |     |          |          |          |          |  |     |          |          |          |          |          |     |          |          |          |          |          |     |          |          |          |          |          |     |          |          |          |          |          |     |          |          |          |          |          |      |          |          |          |          |          |       |          |          |          |          |          |       |          |          |          |          |          |  |   |   |   |   |    |     |          |  |  |  |  |     |          |          |  |  |  |     |          |          |          |  |  |     |          |          |          |          |  |      |          |          |          |          |          |       |          |          |          |          |          |       |          |          |          |          |          |  |    |    |  |  |  |       |          |  |  |  |  |       |          |          |  |  |  |
| 12 B                                                                                                                                   | 2.909395                                                                                                                                                                                                                                                                                                                                                                                                                                                                                                                                                                                                                                                                                                                                                                                                                                                                                                                                                                                                                                                                                                                                                                                                                                                                                                                                                                                                                                                                                                                                                                                                                                                                                                                                                                                                                                                                                                                                                                                                                                                                                                                                                                                                                                                                                                                                                                                                                    | 2.919751 | 3.395988 | 1.846700 | 2.873109 |   |   |     |          |  |  |  |  |     |          |          |  |  |  |     |          |          |          |  |  |     |          |          |          |          |  |     |          |          |          |          |          |     |          |          |          |          |          |     |          |          |          |          |          |     |          |          |          |          |          |     |          |          |          |          |          |      |          |          |          |          |          |       |          |          |          |          |          |       |          |          |          |          |          |  |   |   |   |   |    |     |          |  |  |  |  |     |          |          |  |  |  |     |          |          |          |  |  |     |          |          |          |          |  |      |          |          |          |          |          |       |          |          |          |          |          |       |          |          |          |          |          |  |    |    |  |  |  |       |          |  |  |  |  |       |          |          |  |  |  |
|                                                                                                                                        | 11                                                                                                                                                                                                                                                                                                                                                                                                                                                                                                                                                                                                                                                                                                                                                                                                                                                                                                                                                                                                                                                                                                                                                                                                                                                                                                                                                                                                                                                                                                                                                                                                                                                                                                                                                                                                                                                                                                                                                                                                                                                                                                                                                                                                                                                                                                                                                                                                                          | 12       |          |          |          |   |   |     |          |  |  |  |  |     |          |          |  |  |  |     |          |          |          |  |  |     |          |          |          |          |  |     |          |          |          |          |          |     |          |          |          |          |          |     |          |          |          |          |          |     |          |          |          |          |          |     |          |          |          |          |          |      |          |          |          |          |          |       |          |          |          |          |          |       |          |          |          |          |          |  |   |   |   |   |    |     |          |  |  |  |  |     |          |          |  |  |  |     |          |          |          |  |  |     |          |          |          |          |  |      |          |          |          |          |          |       |          |          |          |          |          |       |          |          |          |          |          |  |    |    |  |  |  |       |          |  |  |  |  |       |          |          |  |  |  |
| 11 Co                                                                                                                                  | 0.000000                                                                                                                                                                                                                                                                                                                                                                                                                                                                                                                                                                                                                                                                                                                                                                                                                                                                                                                                                                                                                                                                                                                                                                                                                                                                                                                                                                                                                                                                                                                                                                                                                                                                                                                                                                                                                                                                                                                                                                                                                                                                                                                                                                                                                                                                                                                                                                                                                    |          |          |          |          |   |   |     |          |  |  |  |  |     |          |          |  |  |  |     |          |          |          |  |  |     |          |          |          |          |  |     |          |          |          |          |          |     |          |          |          |          |          |     |          |          |          |          |          |     |          |          |          |          |          |     |          |          |          |          |          |      |          |          |          |          |          |       |          |          |          |          |          |       |          |          |          |          |          |  |   |   |   |   |    |     |          |  |  |  |  |     |          |          |  |  |  |     |          |          |          |  |  |     |          |          |          |          |  |      |          |          |          |          |          |       |          |          |          |          |          |       |          |          |          |          |          |  |    |    |  |  |  |       |          |  |  |  |  |       |          |          |  |  |  |
| 12 B                                                                                                                                   | 1.998821                                                                                                                                                                                                                                                                                                                                                                                                                                                                                                                                                                                                                                                                                                                                                                                                                                                                                                                                                                                                                                                                                                                                                                                                                                                                                                                                                                                                                                                                                                                                                                                                                                                                                                                                                                                                                                                                                                                                                                                                                                                                                                                                                                                                                                                                                                                                                                                                                    | 0.000000 |          |          |          |   |   |     |          |  |  |  |  |     |          |          |  |  |  |     |          |          |          |  |  |     |          |          |          |          |  |     |          |          |          |          |          |     |          |          |          |          |          |     |          |          |          |          |          |     |          |          |          |          |          |     |          |          |          |          |          |      |          |          |          |          |          |       |          |          |          |          |          |       |          |          |          |          |          |  |   |   |   |   |    |     |          |  |  |  |  |     |          |          |  |  |  |     |          |          |          |  |  |     |          |          |          |          |  |      |          |          |          |          |          |       |          |          |          |          |          |       |          |          |          |          |          |  |    |    |  |  |  |       |          |  |  |  |  |       |          |          |  |  |  |

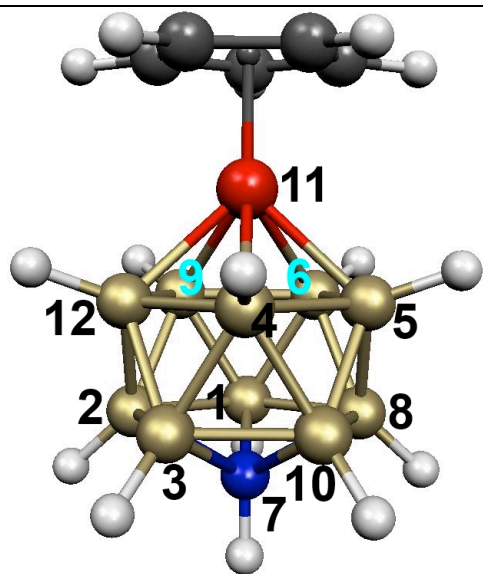

3. -1886.201259 +3.5 H/L 3.20  $C_{5v}$

|       | 1        | 2        | 3        | 4        | 5        |
|-------|----------|----------|----------|----------|----------|
| 1 B   | 0.000000 |          |          |          |          |
| 2 B   | 1.791796 | 0.000000 |          |          |          |
| 3 B   | 2.898829 | 1.791939 | 0.000000 |          |          |
| 4 B   | 3.390039 | 2.875785 | 1.747009 | 0.000000 |          |
| 5 B   | 2.875641 | 3.391027 | 2.876233 | 1.800421 | 0.000000 |
| 6 B   | 1.746890 | 2.875824 | 3.389972 | 2.911626 | 1.799138 |
| 7 N   | 1.686321 | 1.686887 | 1.686241 | 2.673289 | 2.673559 |
| 8 B   | 1.791594 | 2.899381 | 2.898979 | 2.875837 | 1.747096 |
| 9 B   | 1.747192 | 1.747142 | 2.876290 | 2.912665 | 2.913180 |
| 10 B  | 2.899645 | 2.900143 | 1.792074 | 1.746175 | 1.746455 |
| 11 Co | 3.220235 | 3.220271 | 3.220243 | 2.052174 | 2.052935 |
| 12 B  | 2.875518 | 1.746532 | 1.746473 | 1.799693 | 2.912976 |
|       | 6        | 7        | 8        | 9        | 10       |
| 6 B   | 0.000000 |          |          |          |          |
| 7 N   | 2.673025 | 0.000000 |          |          |          |
| 8 B   | 1.746683 | 1.686128 | 0.000000 |          |          |
| 9 B   | 1.800582 | 2.674051 | 2.876488 | 0.000000 |          |
| 10 B  | 2.875090 | 1.687405 | 1.792221 | 3.391286 | 0.000000 |
| 11 Co | 2.052618 | 3.558500 | 3.220733 | 2.052829 | 3.219691 |
| 12 B  | 2.912431 | 2.673088 | 3.390474 | 1.800520 | 2.875429 |
|       | 11       | 12       |          |          |          |
| 11 Co | 0.000000 |          |          |          |          |
| 12 B  | 2.052879 | 0.000000 |          |          |          |

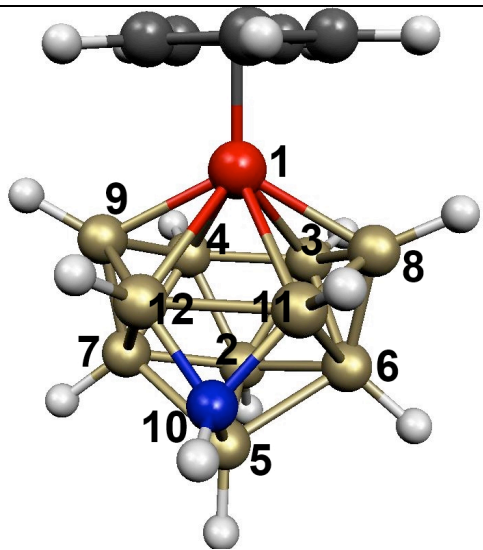

4. -1886.137805 +43.3 H/L 2.61  $C_s$

|      | 1        | 2        | 3        | 4        | 5        |
|------|----------|----------|----------|----------|----------|
| 1 Co | 0.000000 |          |          |          |          |
| 2 B  | 3.071312 | 0.000000 |          |          |          |
| 3 B  | 2.135321 | 1.786123 | 0.000000 |          |          |
| 4 B  | 2.130642 | 1.783603 | 1.755181 | 0.000000 |          |
| 5 B  | 3.573012 | 1.707165 | 3.020987 | 3.016630 | 0.000000 |
| 6 B  | 3.006868 | 1.753789 | 1.807784 | 2.925487 | 1.930712 |
| 7 B  | 3.007389 | 1.754653 | 2.931188 | 1.806861 | 1.929850 |
| 8 B  | 2.052670 | 2.825805 | 1.710951 | 3.038869 | 3.168033 |
| 9 B  | 2.050158 | 2.824151 | 3.043884 | 1.713036 | 3.160707 |
| 10 N | 3.178464 | 2.801403 | 3.492482 | 3.491236 | 1.495232 |
| 11 B | 2.266559 | 2.946768 | 2.762902 | 3.318012 | 2.390057 |
| 12 B | 2.266566 | 2.944538 | 3.320807 | 2.762931 | 2.382417 |
|      | 6        | 7        | 8        | 9        | 10       |
| 6 B  | 0.000000 |          |          |          |          |
| 7 B  | 3.024629 | 0.000000 |          |          |          |
| 8 B  | 1.648440 | 3.690963 | 0.000000 |          |          |
| 9 B  | 3.685333 | 1.645860 | 3.600233 | 0.000000 |          |
| 10 N | 2.466973 | 2.476366 | 3.008536 | 3.008190 | 0.000000 |
| 11 B | 1.988239 | 3.134813 | 1.689561 | 3.130725 | 1.536633 |
| 12 B | 3.124999 | 1.993472 | 3.130223 | 1.690966 | 1.533766 |
|      | 11       | 12       |          |          |          |
| 11 B | 0.000000 |          |          |          |          |
| 12 B | 1.928453 | 0.000000 |          |          |          |



Table S5C. Energy ranking for all of the CpCoNHB<sub>10</sub>H<sub>10</sub> optimized structures:

| No | Initial structure     | Final energy (a.u.) | $\Delta E$ ( kcal/mol) |
|----|-----------------------|---------------------|------------------------|
| 1  | Anticuboh-Co3-f       | -1886.0120089       | 0.00                   |
| 2  | Anticuboh-Co3-a_r-267 | -1886.0120083       | 0.00                   |
| 3  | Cuboctaedru-Co2-a     | -1886.0120055       | 0.00                   |
| 4  | Anticuboh-Co1-d       | -1886.0120052       | 0.00                   |
| 5  | Anticuboh-Co1-a       | -1886.0120049       | 0.00                   |
| 6  | Anticuboh-Co3-e       | -1886.0120047       | 0.00                   |
| 7  | Cuboctaedru-Co1-b     | -1886.0120045       | 0.00                   |
| 8  | Cuboctaedru-Co2-e     | -1886.0120036       | 0.00                   |
| 9  | Cuboctaedru-Co2-f     | -1886.0120009       | 0.01                   |
| 10 | Icos-Co-a             | -1886.0120005       | 0.01                   |
| 11 | Cuboctaedru-Co1-a     | -1886.0119999       | 0.01                   |
| 12 | Anticuboh-Co3-d       | -1886.0106949       | 0.82                   |
| 13 | Icos-Co-b             | -1886.0106930       | 0.83                   |
| 14 | Cuboctaedru-Co2-d     | -1886.0106913       | 0.83                   |
| 15 | Cuboctaedru-Co2-h     | -1886.0106911       | 0.83                   |
| 16 | Cuboctaedru-Co2-g     | -1886.0106903       | 0.83                   |
| 17 | Anticuboh-Co2-b_r-330 | -1886.0106893       | 0.83                   |
| 18 | Cuboctaedru-Co2-b     | -1886.0106882       | 0.83                   |
| 19 | Cuboctaedru-Co1-c     | -1886.0106869       | 0.83                   |
| 20 | Icos-Co-c             | -1886.0050772       | 4.35                   |
| 21 | Cuboctaedru-Co1-d     | -1886.0050162       | 4.39                   |
| 22 | Cuboctaedru-Co2-c     | -1886.0049887       | 4.41                   |
| 23 | Anticuboh-Co1-e       | -1886.0049765       | 4.41                   |
| 24 | Anticuboh-Co2-e       | -1885.9510681       | 38.24                  |
| 25 | Anticuboh-Co2-d       | -1885.9457810       | 41.56                  |
| 26 | Anticuboh-Co2-c       | -1885.9393122       | 45.62                  |
| 27 | Anticuboh-Co3-b       | -1885.9342017       | 48.83                  |
| 28 | Anticuboh-Co3-g       | -1885.9306984       | 51.02                  |
| 29 | Anticuboh-Co2-a       | -1885.9305291       | 51.13                  |
| 30 | Anticuboh-Co3-c_r-332 | -1885.9303060       | 51.27                  |
| 31 | Anticuboh-Co3-c_i-332 | -1885.9295732       | 51.73                  |
| 32 | Anticuboh-Co1-b       | -1885.9135172       | 61.81                  |
| 33 | Anticuboh-Co3-a_i-267 | -1885.9062007       | 66.40                  |
| 34 | Anticuboh-Co1-c       | -1885.9020220       | 69.02                  |
| 35 | Anticuboh-Co2-b_i-330 | -1885.8500313       | 101.64                 |
